# Supplementary material for: Evolutionary Plasticity and Innovations in Complex Metabolic Reaction Networks
Source: PLoS Comput Biol. 2009 Dec 18;5(12):e1000613. doi: 10.1371/journal.pcbi.1000613 (PMC2785887; doi:10.1371/journal.pcbi.1000613)
Supplement: Table S1 — List of reactions that appear frequently as essential in random metabolic networks (0.43 MB XLS) [file pcbi.1000613.s008.xls]

## Sheet: final-info-essapp-min-rich3
Average (min+rich)	Appearance Minimal	Appearance Rich	Reaction ID	Name	Formula	Pathway	EC number
1	1	1	EC905	anthranilate phosphoribosyltransferase	[c]anth + prpp --> ppi + pran	Tyrosine, Tryptophan, and Phenylalanine Metabolism	EC-2.4.2.18
1	1	1	EC903	indole-3-glycerol-phosphate synthase	[c]2cpr5p + h --> 3ig3p + co2 + h2o	Tyrosine, Tryptophan, and Phenylalanine Metabolism	EC-4.1.1.48
1	1	1	EC902	phosphoribosylanthranilate isomerase (irreversible)	[c]pran --> 2cpr5p	Tyrosine, Tryptophan, and Phenylalanine Metabolism	EC-5.3.1.24
1	1	1	EC895	shikimate kinase	[c]atp + skm --> adp + h + skm5p	Tyrosine, Tryptophan, and Phenylalanine Metabolism	EC-2.7.1.71
1	1	1	EC891	chorismate synthase	[c]3psme --> chor + pi	Tyrosine, Tryptophan, and Phenylalanine Metabolism	EC-4.2.3.5
1	1	1	EC889	3-phosphoshikimate 1-carboxyvinyltransferase	[c]pep + skm5p <==> 3psme + pi	Tyrosine, Tryptophan, and Phenylalanine Metabolism	EC-2.5.1.19
1	1	1	EC582	dTMP kinase	[c]atp + dtmp <==> adp + dtdp	Nucleotide Salvage Pathways	EC-2.7.4.9
1	1	1	EC569	nucleoside-diphosphate kinase (ATP:dTDP)	[c]atp + dtdp <==> adp + dttp	Nucleotide Salvage Pathways	EC-2.7.4.6
1	1	1	EC547	guanylate kinase (GMP:ATP)	[c]atp + gmp <==> adp + gdp	Nucleotide Salvage Pathways	EC-2.7.4.8
1	1	1	EC504	Phosphatidylserine syntase (Ecoli)	[c](0.02) cdpdag1 + ser-L <==> cmp + h + (0.02) ps_EC	Membrane Lipid Metabolism	EC-2.7.8.8
1	1	1	EC502	Phosphatidic acid synthase (Ecoli)	[c]glyc3p + (0.14) hdeACP + (0.04) myrsACP + octeACP + (0.72) palmACP + (0.1) tdeACP --> (2) ACP + (0.02) pa_EC	Membrane Lipid Metabolism
1	1	1	EC501	Phosphatidylglycerol synthase (Ecoli)	[c](0.02) cdpdag1 + glyc3p <==> cmp + h + (0.02) pgp_EC	Membrane Lipid Metabolism	EC-2.7.8.5
1	1	1	EC500	Phosphatidylglycerol phosphate phosphatase (Ecoli)	[c]h2o + (0.02) pgp_EC --> (0.02) pg_EC + pi	Membrane Lipid Metabolism	EC-3.1.3.27
1	1	1	EC496	Fatty acid biosynthesis (n-C16:1)	[c]actACP + (19) h + (6) malACP + (13) nadph --> (6) ACP + (6) co2 + (7) h2o + hdeACP + (13) nadp	Membrane Lipid Metabolism
1	1	1	EC493	Fatty acid biosynthesis (n-C14:1)	[c]actACP + (16) h + (5) malACP + (11) nadph --> (5) ACP + (5) co2 + (6) h2o + (11) nadp + tdeACP	Membrane Lipid Metabolism
1	1	1	EC492	Fatty acid biosynthesis (n-C18:1)	[c]actACP + (22) h + (7) malACP + (15) nadph --> (7) ACP + (7) co2 + (8) h2o + (15) nadp + octeACP	Membrane Lipid Metabolism
1	1	1	EC489	Malonyl-CoA-ACP transacylase	[c]ACP + malcoa <==> coa + malACP	Membrane Lipid Metabolism	EC-2.3.1.39
1	1	1	EC486	Fatty acid biosynthesis (n-C12:0)	[c]actACP + (14) h + (4) malACP + (10) nadph --> (4) ACP + (4) co2 + ddcaACP + (5) h2o + (10) nadp	Membrane Lipid Metabolism
1	1	1	EC485	Fatty acid biosynthesis (n-C14:0)	[c]actACP + (17) h + (5) malACP + (12) nadph --> (5) ACP + (5) co2 + (6) h2o + myrsACP + (12) nadp	Membrane Lipid Metabolism
1	1	1	EC484	Cardiolipin Synthase (E.coli)	[c](0.04) pg_EC <==> (0.02) clpn_EC + glyc	Membrane Lipid Metabolism
1	1	1	EC483	CDP-Diacylglycerol synthetase (Ecoli)	[c]ctp + h + (0.02) pa_EC <==> (0.02) cdpdag1 + ppi	Membrane Lipid Metabolism	EC-2.7.7.41
1	1	1	EC455	glucose-1-phosphate adenylyltransferase	[c]atp + g1p + h --> adpglc + ppi	Glycolysis/Gluconeogenesis	EC-2.7.7.27
1	1	1	EC454	glycogen synthase (ADPGlc)	[c]adpglc --> adp + glycogen + h	Glycolysis/Gluconeogenesis	EC-2.4.1.21
1	1	1	EC419	NAD kinase	[c]atp + nad --> adp + h + nadp	Cofactor and Prosthetic Group Biosynthesis	EC-2.7.1.23
1	1	1	EC398	riboflavin synthase	[c](2) dmlz --> 4r5au + ribflv	Cofactor and Prosthetic Group Biosynthesis	EC-2.5.1.9
1	1	1	EC397	FMN adenylyltransferase	[c]atp + fmn + h --> fad + ppi	Cofactor and Prosthetic Group Biosynthesis	EC-2.7.7.2
1	1	1	EC395	riboflavin synthase	[c]4r5au + db4p --> dmlz + (2) h2o + pi	Cofactor and Prosthetic Group Biosynthesis	EC-2.5.1.9
1	1	1	EC394	diaminohydroxyphosphoribosylaminopryrimidine deaminase (25drapp)	[c]25drapp + h + h2o --> 5apru + nh4	Cofactor and Prosthetic Group Biosynthesis	EC-3.5.4.26
1	1	1	EC393	5-amino-6-(5-phosphoribosylamino)uracil reductase	[c]5apru + h + nadph --> 5aprbu + nadp	Cofactor and Prosthetic Group Biosynthesis	EC-1.1.1.193
1	1	1	EC392	3,4-Dihydroxy-2-butanone-4-phosphate	[c]ru5p-D --> db4p + for + h	Cofactor and Prosthetic Group Biosynthesis
1	1	1	EC391	GTP cyclohydrolase II (25drapp)	[c]gtp + (3) h2o --> 25drapp + for + (2) h + ppi	Cofactor and Prosthetic Group Biosynthesis
1	1	1	EC326	dihydrofolate synthase	[c]atp + dhpt + glu-L --> adp + dhf + pi	Cofactor and Prosthetic Group Biosynthesis	EC-6.3.2.12
1	1	1	EC325	dihydroneopterin aldolase	[c]dhnpt --> 6hmhpt + gcald	Cofactor and Prosthetic Group Biosynthesis
1	1	1	EC307	pantothenate kinase	[c]atp + pnto-R --> 4ppan + adp + h	Cofactor and Prosthetic Group Biosynthesis	EC-2.7.1.33
1	1	1	EC291	dephospho-CoA kinase	[c]atp + dpcoa --> adp + coa + h	Cofactor and Prosthetic Group Biosynthesis	EC-2.7.1.24
1	1	1	EC290	phosphopantothenoylcysteine decarboxylase	[c]4ppcys + h --> co2 + pan4p	Cofactor and Prosthetic Group Biosynthesis	EC-4.1.1.36
1	1	1	EC285	pyrimidine phosphatase	[c]5aprbu + h2o --> 4r5au + pi	Cofactor and Prosthetic Group Biosynthesis
1	1	1	EC264	UDP-sugar hydrolase	[c]h2o + u23ga --> (2) h + lipidX + ump	Cell Envelope Biosynthesis
1	1	1	EC257	Lipopolysaccharide synthesis (Ecoli)	[c](3) adphep-L,D + (2) cdpea + (3) ckdo + lipa + (2) udpg --> (3) adp + (2) cdp + (3) cmp + (10) h + lps_EC + (2) udp	Cell Envelope Biosynthesis
1	1	1	EC256	D-glycero-D-manno-heptose 7-phosphate kinase	[c]atp + gmhep7p --> adp + gmhep17bp + h	Cell Envelope Biosynthesis
1	1	1	EC255	D-glycero-D-manno-hepose 1-phosphate adenyltransferase	[c]atp + gmhep1p + h --> adphep-D,D + ppi	Cell Envelope Biosynthesis
1	1	1	EC254	ADP-D-glycero-D-manno-heptose epimerase	[c]adphep-D,D --> adphep-L,D	Cell Envelope Biosynthesis	EC-5.1.3.20
1	1	1	EC243	UDP-N-acetylglucosamine-N-acetylmuramyl-(pentapeptide)pyrophosphoryl-undecaprenol N-acetylglucosamine transferase	[c]uacgam + uagmda --> h + uaagmda + udp	Cell Envelope Biosynthesis
1	1	1	EC242	UDP-N-acetylmuramoyl-L-alanyl-D-glutamyl-meso-2,6-diaminopimeloyl-D-alanyl-D-alanine synthetase	[c]alaala + atp + ugmd --> adp + h + pi + ugmda	Cell Envelope Biosynthesis	EC-6.3.2.15
1	1	1	EC241	UDP-N-acetylmuramoyl-L-alanyl-D-glutamyl-meso-2,6-diaminopimelate synthetase	[c]26dap-M + atp + uamag --> adp + h + pi + ugmd	Cell Envelope Biosynthesis	EC-6.3.2.13
1	1	1	EC240	UDP-N-acetylmuramoyl-L-alanyl-D-glutamate synthetase	[c]atp + glu-D + uama --> adp + h + pi + uamag	Cell Envelope Biosynthesis	EC-6.3.2.9
1	1	1	EC239	UDP-N-acetylmuramoyl-L-alanine synthetase	[c]ala-L + atp + uamr --> adp + h + pi + uama	Cell Envelope Biosynthesis	EC-6.3.2.8
1	1	1	EC237	UDP-N-acetylglucosamine 1-carboxyvinyltransferase	[c]pep + uacgam --> pi + uaccg	Cell Envelope Biosynthesis	EC-2.5.1.7
1	1	1	EC236	Endotoxin Synthesis (myristoyl transferase)	[c]kdo2lipid4L + myrsACP --> ACP + lipa	Cell Envelope Biosynthesis
1	1	1	EC233	phospho-N-acetylmuramoyl-pentapeptide-transferase (meso-2,6-diaminopimelate)	[c]udcpp + ugmda --> uagmda + ump	Cell Envelope Biosynthesis	EC-2.7.8.13
1	1	1	EC230	Endotoxin Synthesis (lauroyl transferase)	[c]ddcaACP + kdo2lipid4 --> ACP + kdo2lipid4L	Cell Envelope Biosynthesis
1	1	1	EC229	Tetraacyldisaccharide 4'kinase	[c]atp + lipidAds --> adp + h + lipidA	Cell Envelope Biosynthesis	EC-2.7.1.130
1	1	1	EC228	UDP-3-O-(3-hydroxymyristoyl)glucosamine acyltransferase	[c]3hmrsACP + u3hga --> ACP + h + u23ga	Cell Envelope Biosynthesis
1	1	1	EC227	UDP-3-O-acetylglucosamine deacetylase	[c]h2o + u3aga --> ac + u3hga	Cell Envelope Biosynthesis
1	1	1	EC226	Lipid A disaccaride synthase	[c]lipidX + u23ga --> h + lipidAds + udp	Cell Envelope Biosynthesis	EC-2.4.1.182
1	1	1	EC225	UDP-N-acetylglucosamine acyltransferase	[c]3hmrsACP + uacgam <==> ACP + u3aga	Cell Envelope Biosynthesis	EC-2.3.1.129
1	1	1	EC224	3-deoxy-D-manno-octulosonic acid transferase	[c]ckdo + kdolipid4 --> cmp + h + kdo2lipid4	Cell Envelope Biosynthesis
1	1	1	EC223	3-deoxy-D-manno-octulosonic acid transferase	[c]ckdo + lipidA --> cmp + h + kdolipid4	Cell Envelope Biosynthesis
1	1	1	EC222	3-deoxy-manno-octulosonate cytidylyltransferase	[c]ctp + kdo --> ckdo + ppi	Cell Envelope Biosynthesis	EC-2.7.7.38
1	1	1	EC220	D-glycero-D-manno-heptose 1,7-bisphosphate phosphatase	[c]gmhep17bp + h2o --> gmhep1p + pi	Cell Envelope Biosynthesis
1	1	1	EC219	sedoheptulose 7-phosphate isomerase	[c]s7p --> gmhep7p	Cell Envelope Biosynthesis
1	1	1	EC210	glutamine-fructose-6-phosphate transaminase	[c]f6p + gln-L --> gam6p + glu-L	Cell Envelope Biosynthesis	EC-2.6.1.16
1	1	1	EC203	D-alanine-D-alanine ligase (reversible)	[c](2) ala-D + atp <==> adp + alaala + h + pi	Cell Envelope Biosynthesis	EC-6.3.2.4
1	1	1	EC193	undecaprenyl-diphosphatase	[c]h2o + udcpdp --> h + pi + udcpp	Cell Envelope Biosynthesis	EC-3.6.1.27
1	1	1	EC192	Peptidoglycan subunit synthesis	[c]uaagmda --> h + peptido_EC + udcpdp	Cell Envelope Biosynthesis
1	1	1	EC188	spermidine synthase	[c]ametam + ptrc --> 5mta + h + spmd	Arginine and Proline Metabolism	EC-2.5.1.16
1	1	1	EC187	Adenosylmethionine decarboxylase	[c]amet + h <==> ametam + co2	Arginine and Proline Metabolism	EC-4.1.1.50
0.9965	1	0.993	EC327	GTP cyclohydrolase I	[c]gtp + h2o --> ahdt + for	Cofactor and Prosthetic Group Biosynthesis	EC-3.5.4.16
0.9965	0.998	0.995	EC490	Fatty acid biosynthesis (n-C16:0)	[c]actACP + (20) h + (6) malACP + (14) nadph --> (6) ACP + (6) co2 + (7) h2o + (14) nadp + palmACP	Membrane Lipid Metabolism
0.9865	0.983	0.99	EC503	Phosphatidylserine decarboxylase (Ecoli)	[c]h + (0.02) ps_EC --> co2 + (0.02) pe_EC	Membrane Lipid Metabolism	EC-4.1.1.65
0.9795	1	0.959	EC894	3-deoxy-D-arabino-heptulosonate 7-phosphate synthetase	[c]e4p + h2o + pep --> 2dda7p + pi	Tyrosine, Tryptophan, and Phenylalanine Metabolism	EC-4.1.2.15
0.9795	1	0.959	EC892	3-dehydroquinate dehydratase	[c]3dhq <==> 3dhsk + h2o	Tyrosine, Tryptophan, and Phenylalanine Metabolism	EC-4.2.1.10
0.9795	1	0.959	EC890	3-dehydroquinate synthase	[c]2dda7p --> 3dhq + pi	Tyrosine, Tryptophan, and Phenylalanine Metabolism
0.969	0.98	0.958	EC211	UDP-N-acetylglucosamine diphosphorylase	[c]acgam1p + h + utp --> ppi + uacgam	Cell Envelope Biosynthesis	EC-2.7.7.23
0.919	0.942	0.896	EC013	arabinose-5-phosphate isomerase	[c]ru5p-D <==> ara5p	Alternate Carbon Metabolism	EC-5.3.1.13
0.8915	0.937	0.846	EC538	UMP kinase	[c]atp + ump <==> adp + udp	Nucleotide Salvage Pathways
0.8855	0.87	0.901	EC428	Glycolaldehyde dehydrogenase	[c]gcald + h2o + nad --> glyclt + (2) h + nadh	Folate Metabolism	EC-1.2.1.21
0.86	0.868	0.852	EC376	4-aminobenzoate synthase	[c]4adcho --> 4abz + h + pyr	Cofactor and Prosthetic Group Biosynthesis
0.8505	0.89	0.811	EC479	phosphoribosylpyrophosphate synthetase	[c]atp + r5p <==> amp + h + prpp	Histidine Metabolism	EC-2.7.6.1
0.8475	0.849	0.846	EC195	ethanolamine phosphotransferase	[c]cmp + h + (0.02) pe_EC <==> (0.02) 12dgr_EC + cdpea	Cell Envelope Biosynthesis	EC-2.7.8.1
0.834	0.834	0.834	EC204	Diacylglycerol kinase	[c](0.02) 12dgr_EC + atp --> adp + h + (0.02) pa_EC	Cell Envelope Biosynthesis	EC-2.7.1.107
0.8	0.839	0.761	EC212	glucosamine-1-phosphate N-acetyltransferase	[c]accoa + gam1p --> acgam1p + coa + h	Cell Envelope Biosynthesis	EC-2.3.1.157
0.7835	0.817	0.75	EC221	3-deoxy -D-manno-octulosonic -acid 8-phosphate	[c]ara5p + h2o + pep --> kdo8p + pi	Cell Envelope Biosynthesis	EC-4.1.2.16
0.7835	0.817	0.75	EC194	3-deoxy-manno-octulosonate-8-phosphatase	[c]h2o + kdo8p --> kdo + pi	Cell Envelope Biosynthesis	EC-3.1.3.45
0.7135	0.75	0.677	EC396	riboflavin kinase	[c]atp + ribflv --> adp + fmn + h	Cofactor and Prosthetic Group Biosynthesis	EC-2.7.1.26
0.697	0.458	0.936	EC155	5-methylthioribose-1-phosphate isomerase	[c]5mdr1p <==> 5mdru1p	Arginine and Proline Metabolism	EC-5.3.1.23
0.697	0.458	0.936	EC149	5-Methylthio-5-deoxy-D-ribulose 1-phosphate dehydratase	[c]5mdru1p --> dkmpp + h2o	Arginine and Proline Metabolism
0.6965	0.458	0.935	EC512	methionine adenosyltransferase	[c]atp + h2o + met-L --> amet + pi + ppi	Methionine Metabolism	EC-2.5.1.6
0.6755	0.826	0.525	EC652	ribose-5-phosphate isomerase	[c]r5p <==> ru5p-D	Pentose Phosphate Cycle	EC-5.3.1.6
0.6755	0.73	0.621	EC575	ribonucleoside-triphosphate reductase (GTP)	[c]gtp + trdrd --> dgtp + h2o + trdox	Nucleotide Salvage Pathways	EC-1.17.4.2
0.647	0.434	0.86	EC158	2-keto-4-methylthiobutyrate transamination	[c]2kmb + glu-L --> akg + met-L	Arginine and Proline Metabolism
0.6435	0.687	0.6	EC494	b-ketoacyl synthase	[c]accoa + h + malACP --> actACP + co2 + coa	Membrane Lipid Metabolism
0.642	1	0.284	EC371	nicotinate-nucleotide adenylyltransferase	[c]atp + h + nicrnt --> dnad + ppi	Cofactor and Prosthetic Group Biosynthesis	EC-2.7.7.18
0.637	0.706	0.568	EC901	tryptophan synthase (indoleglycerol phosphate)	[c]3ig3p + ser-L --> g3p + h2o + trp-L	Tyrosine, Tryptophan, and Phenylalanine Metabolism	EC-4.2.1.20
0.6295	0.717	0.542	EC651	ribulose 5-phosphate 3-epimerase	[c]ru5p-D <==> xu5p-D	Pentose Phosphate Cycle	EC-5.1.3.1
0.6115	0.652	0.571	EC576	ribonucleoside-triphosphate reductase (CTP)	[c]ctp + trdrd --> dctp + h2o + trdox	Nucleotide Salvage Pathways	EC-1.17.4.2
0.608	1	0.216	EC662	adenylsuccinate lyase	[c]dcamp <==> amp + fum	Purine and Pyrimidine Biosynthesis	EC-4.3.2.2
0.608	1	0.216	EC660	adenylosuccinate synthase	[c]asp-L + gtp + imp --> dcamp + gdp + (2) h + pi	Purine and Pyrimidine Biosynthesis	EC-6.3.4.4
0.604	0.584	0.624	R04620	2-Amino-4-hydroxy-6-(erythro-1,2,3-trihydroxypropyl) dihydropteridine triphosphate phosphohydrolase (alkaline optimum)	2-Amino-4-hydroxy-6-(erythro-1,2,3-trihydroxypropyl)dihydropteridine triphosphate + 3 H2O <=> 2-Amino-4-hydroxy-6-(D-erythro-1,2,3-trihydroxypropyl)-7,8- dihydropteridine + 3 Orthophosphate	Folate biosynthesis	3.1.3.1
0.599	0.604	0.594	EC574	ribonucleoside-triphosphate reductase (ATP)	[c]atp + trdrd --> datp + h2o + trdox	Nucleotide Salvage Pathways	EC-1.17.4.2
0.5965	0.561	0.632	R03066	2-Amino-4-hydroxy-6-hydroxymethyl-7,8-dihydropteridine:4- aminobenzoate 2-amino-4-hydroxydihydropteridine-6-methenyltransferase	2-Amino-4-hydroxy-6-hydroxymethyl-7,8-dihydropteridine + 4-Aminobenzoate <=> Dihydropteroate + H2O	Folate biosynthesis	2.5.1.15
0.583	0.974	0.192	EC657	GMP synthase	[c]atp + gln-L + h2o + xmp --> amp + glu-L + gmp + (2) h + ppi	Purine and Pyrimidine Biosynthesis	EC-6.3.5.2
0.564	0.6	0.528	EC581	thymidylate synthase	[c]dump + mlthf --> dhf + dtmp	Nucleotide Salvage Pathways	EC-2.1.1.45
0.5565	0.492	0.621	R07307	dCTP aminohydrolase (dUMP-forming)	dCTP + 2 H2O <=> dUMP + Pyrophosphate + NH3		3.5.4.30
0.555	0.533	0.577	EC654	transketolase	[c]r5p + xu5p-D <==> g3p + s7p	Pentose Phosphate Cycle	EC-2.2.1.1
0.55	0.537	0.563	EC653	transaldolase	[c]g3p + s7p <==> e4p + f6p	Pentose Phosphate Cycle	EC-2.2.1.2
0.531	0.996	0.066	EC365	quinolinate synthase	[c]dhap + iasp --> h + (2) h2o + pi + quln	Cofactor and Prosthetic Group Biosynthesis
0.5305	0.564	0.497	EC904	anthranilate synthase	[c]chor + gln-L --> anth + glu-L + h + pyr	Tyrosine, Tryptophan, and Phenylalanine Metabolism	EC-4.1.3.27
0.522	1	0.044	EC897	chorismate mutase	[c]chor --> pphn	Tyrosine, Tryptophan, and Phenylalanine Metabolism	EC-5.4.99.5
0.5175	0.967	0.068	EC658	IMP dehydrogenase	[c]h2o + imp + nad --> h + nadh + xmp	Purine and Pyrimidine Biosynthesis	EC-1.1.1.205
0.511	1	0.022	EC679	orotidine-5'-phosphate decarboxylase	[c]h + orot5p --> co2 + ump	Purine and Pyrimidine Biosynthesis	EC-4.1.1.23
0.511	1	0.022	EC678	orotate phosphoribosyltransferase	[c]orot5p + ppi <==> orot + prpp	Purine and Pyrimidine Biosynthesis	EC-2.4.2.10
0.511	1	0.022	EC675	dihydroorotase	[c]dhor-S + h2o <==> cbasp + h	Purine and Pyrimidine Biosynthesis	EC-3.5.2.3
0.511	1	0.022	EC674	aspartate carbamoyltransferase	[c]asp-L + cbp --> cbasp + h + pi	Purine and Pyrimidine Biosynthesis	EC-2.1.3.2
0.5085	0.587	0.43	EC308	pantetheine-phosphate adenylyltransferase	[c]atp + h + pan4p --> dpcoa + ppi	Cofactor and Prosthetic Group Biosynthesis	EC-2.7.7.3
0.5005	1	0.001	EC671	phosphoribosylaminoimidazole synthase	[c]atp + fpram --> adp + air + (2) h + pi	Purine and Pyrimidine Biosynthesis	EC-6.3.3.1
0.5005	1	0.001	EC670	phosphoribosylformylglycinamidine synthase	[c]atp + fgam + gln-L + h2o --> adp + fpram + glu-L + h + pi	Purine and Pyrimidine Biosynthesis	EC-6.3.5.3
0.5005	1	0.001	EC668	IMP cyclohydrolase	[c]h2o + imp <==> fprica	Purine and Pyrimidine Biosynthesis	EC-3.5.4.10
0.5005	1	0.001	EC664	phosphoribosylglycinamide synthase	[c]atp + gly + pram <==> adp + gar + h + pi	Purine and Pyrimidine Biosynthesis	EC-6.3.4.13
0.5005	1	0.001	EC663	phosphoribosylaminoimidazolesuccinocarboxamide synthase	[c]5aizc + asp-L + atp <==> 25aics + adp + h + pi	Purine and Pyrimidine Biosynthesis	EC-6.3.2.6
0.5005	1	0.001	EC661	adenylosuccinate lyase	[c]25aics <==> aicar + fum	Purine and Pyrimidine Biosynthesis	EC-4.3.2.2
0.5	1	0	EC932	2-isopropylmalate hydratase	[c]2ippm + h2o <==> 3c3hmp	Valine, leucine, and isoleucine metabolism	EC-4.2.1.33
0.5	1	0	EC931	3-isopropylmalate dehydratase	[c]3c2hmp <==> 2ippm + h2o	Valine, leucine, and isoleucine metabolism	EC-4.2.1.33
0.5	1	0	EC930	2-Oxo-4-methyl-3-carboxypentanoate decarboxylation	[c]3c4mop + h --> 4mop + co2	Valine, leucine, and isoleucine metabolism
0.5	1	0	EC929	3-isopropylmalate dehydrogenase	[c]3c2hmp + nad --> 3c4mop + h + nadh	Valine, leucine, and isoleucine metabolism	EC-1.1.1.85
0.5	1	0	EC928	2-isopropylmalate synthase	[c]3mob + accoa + h2o --> 3c3hmp + coa + h	Valine, leucine, and isoleucine metabolism	EC-4.1.3.12
0.5	1	0	EC923	Dihydroxy-acid dehydratase (2,3-dihydroxy-3-methylpentanoate)	[c]23dhmp --> 3mop + h2o	Valine, leucine, and isoleucine metabolism
0.5	1	0	EC720	diaminopimelate decarboxylase	[c]26dap-M + h --> co2 + lys-L	Threonine and Lysine Metabolism	EC-4.1.1.20
0.5	1	0	EC713	dihydrodipicolinate synthase	[c]aspsa + pyr --> 23dhdp + h + (2) h2o	Threonine and Lysine Metabolism	EC-4.2.1.52
0.5	1	0	EC478	phosphoribosyl-AMP cyclohydrolase	[c]h2o + prbamp --> prfp	Histidine Metabolism	EC-3.5.4.19
0.5	1	0	EC477	phosphoribosyl-ATP pyrophosphatase	[c]h2o + prbatp --> h + ppi + prbamp	Histidine Metabolism	EC-3.6.1.31
0.5	1	0	EC476	ATP phosphoribosyltransferase	[c]atp + prpp --> ppi + prbatp	Histidine Metabolism	EC-2.4.2.17
0.5	1	0	EC475	Imidazole-glycerol-3-phosphate synthase	[c]gln-L + prlp --> aicar + eig3p + glu-L + h	Histidine Metabolism
0.5	1	0	EC473	histidinol-phosphate transaminase	[c]glu-L + imacp --> akg + hisp	Histidine Metabolism	EC-2.6.1.9
0.5	1	0	EC472	histidinol-phosphatase	[c]h2o + hisp --> histd + pi	Histidine Metabolism	EC-3.1.3.15
0.5	1	0	EC471	imidazoleglycerol-phosphate dehydratase	[c]eig3p --> h2o + imacp	Histidine Metabolism	EC-4.2.1.19
0.5	1	0	EC470	1-(5-phosphoribosyl)-5-[(5-phosphoribosylamino)methylideneamino)imidazole-4-carboxamide isomerase (irreversible)	[c]prfp --> prlp	Histidine Metabolism	EC-5.3.1.16
0.5	1	0	EC436	glutamine synthetase	[c]atp + glu-L + nh4 --> adp + gln-L + h + pi	Glutamate metabolism	EC-6.3.1.2
0.5	1	0	EC378	pantothenate synthase	[c]ala-B + atp + pant-R --> amp + h + pnto-R + ppi	Cofactor and Prosthetic Group Biosynthesis	EC-6.3.2.1
0.4985	0.997	0	EC166	argininosuccinate lyase	[c]argsuc <==> arg-L + fum	Arginine and Proline Metabolism	EC-4.3.2.1
0.4985	0.997	0	EC165	argininosuccinate synthase	[c]asp-L + atp + citr-L --> amp + argsuc + h + ppi	Arginine and Proline Metabolism	EC-6.3.4.5
0.4965	0.553	0.44	EC238	UDP-N-acetylenolpyruvoylglucosamine reductase	[c]h + nadph + uaccg --> nadp + uamr	Cell Envelope Biosynthesis	EC-1.1.1.158
0.4965	0.442	0.551	R00550	D-Glucose-1-phosphate:riboflavin 5\'-phosphotransferase	D-Glucose 1-phosphate + Riboflavin <=> D-Glucose + FMN		2.7.1.42
0.494	0.426	0.562	R00353	Malonyl-CoA:pyruvate carboxyltransferase	Malonyl-CoA + Pyruvate <=> Acetyl-CoA + Oxaloacetate	Propanoate metabolism	2.1.3.1
0.491	0.974	0.008	EC443	phosphoserine phosphatase (L-serine)	[c]h2o + pser-L --> pi + ser-L	Glycine and Serine Metabolism	EC-3.1.3.3
0.488	0.976	0	EC380	2-dehydropantoate 2-reductase	[c]2dhp + h + nadph --> nadp + pant-R	Cofactor and Prosthetic Group Biosynthesis	EC-1.1.1.169
0.4875	0.975	0	EC924	dihydroxy-acid dehydratase (2,3-dihydroxy-3-methylbutanoate)	[c]23dhmb --> 3mob + h2o	Valine, leucine, and isoleucine metabolism	EC-4.2.1.9
0.4855	0.545	0.426	EC491	3-hydroxy-myristoyl-ACP synthesis	[c]ddcaACP + (2) h + malACP + nadph --> 3hmrsACP + ACP + co2 + nadp	Membrane Lipid Metabolism
0.4725	0.945	0	EC511	methionine synthase	[c]5mthf + hcys-L --> met-L + thf	Methionine Metabolism	EC-2.1.1.13
0.4655	0.531	0.4	EC098	phosphoglucomutase	[c]g1p <==> g6p	Alternate Carbon Metabolism	EC-5.4.2.2
0.4645	0.869	0.06	EC722	aspartate kinase	[c]asp-L + atp <==> 4pasp + adp	Threonine and Lysine Metabolism	EC-2.7.2.4
0.461	0.501	0.421	EC375	4-amino-4-deoxychorismate synthase	[c]chor + gln-L --> 4adcho + glu-L	Cofactor and Prosthetic Group Biosynthesis
0.4585	0.917	0	EC474	histidinol dehydrogenase	[c]h2o + histd + (2) nad --> (3) h + his-L + (2) nadh	Histidine Metabolism	EC-1.1.1.23
0.453	0.906	0	EC921	ketol-acid reductoisomerase (2-Aceto-2-hydroxybutanoate)	[c]2ahbut + h + nadph --> 23dhmp + nadp	Valine, leucine, and isoleucine metabolism	EC-1.1.1.86
0.451	0.899	0.003	EC272	aconitase	[c]cit <==> icit	Citrate Cycle (TCA)	EC-4.2.1.3
0.449	0.369	0.529	R04726	Dodecanoyl-[acyl-carrier-protein]:malonyl-[acyl-carrier-protein] C-acyltransferase (decarboxylating)	Dodecanoyl-[acyl-carrier protein] + Malonyl-[acyl-carrier protein] <=> 3-Oxotetradecanoyl-[acp] + CO2 + Acyl-carrier protein	Fatty acid biosynthesis	2.3.1.41 2.3.1.85 2.3.1.86
0.446	0.585	0.307	EC460	glucose-6-phosphate isomerase	[c]g6p <==> f6p	Glycolysis/Gluconeogenesis	EC-5.3.1.9
0.4455	0.891	0	EC919	2-aceto-2-hydroxybutanoate synthase	[c]2obut + h + pyr --> 2ahbut + co2	Valine, leucine, and isoleucine metabolism
0.4415	0.373	0.51	R03191	UDP-N-acetylmuramate:NADP+ oxidoreductase	UDP-N-acetylmuramate + NAD+ <=> UDP-N-acetyl-3-(1-carboxyvinyl)-D-glucosamine + NADH	Aminosugars metabolism	1.1.1.158
0.4405	0.496	0.385	EC893	shikimate dehydrogenase	[c]3dhsk + h + nadph <==> nadp + skm	Tyrosine, Tryptophan, and Phenylalanine Metabolism	EC-1.1.1.25
0.4355	0.459	0.412	EC186	Ornithine Decarboxylase	[c]h + orn --> co2 + ptrc	Arginine and Proline Metabolism	EC-4.1.1.17
0.433	0.866	0	EC922	acetohydroxy acid isomeroreductase	[c]alac-S + h + nadph --> 23dhmb + nadp	Valine, leucine, and isoleucine metabolism	EC-1.1.1.86
0.431	0.509	0.353	R00671	L-Ornithine ammonia-lyase(cyclizing)	L-Ornithine <=> L-Proline + NH3	Arginine and proline metabolism	4.3.1.12
0.43	0.808	0.052	EC370	nicotinate-nucleotide diphosphorylase (carboxylating)	[c](2) h + prpp + quln --> co2 + nicrnt + ppi	Cofactor and Prosthetic Group Biosynthesis	EC-2.4.2.19
0.4265	0.273	0.58	R01402	5\'-Methylthioadenosine:orthophosphate methylthio-D-ribosyltransferase	5\'-Methylthioadenosine + Orthophosphate <=> Adenine + S-Methyl-5-thio-D-ribose 1-phosphate	Methionine metabolism	2.4.2.28
0.4235	0.832	0.015	EC379	aspartate 1-decarboxylase	[c]asp-L + h --> ala-B + co2	Cofactor and Prosthetic Group Biosynthesis	EC-4.1.1.11
0.423	0.839	0.007	EC444	phosphoserine transaminase	[c]3php + glu-L --> akg + pser-L	Glycine and Serine Metabolism	EC-2.6.1.52
0.423	0.839	0.007	EC442	phosphoglycerate dehydrogenase	[c]3pg + nad --> 3php + h + nadh	Glycine and Serine Metabolism	EC-1.1.1.95
0.423	0.338	0.508	R03036	Dephospho-CoA nucleotidohydrolase	Dephospho-CoA + H2O <=> Pantetheine 4\'-phosphate + AMP	Pantothenate and CoA biosynthesis	3.6.1.9
0.42	0.84	0	EC920	acetolactate synthase	[c]h + (2) pyr --> alac-S + co2	Valine, leucine, and isoleucine metabolism	EC-4.1.3.18
0.42	0.414	0.426	EC045	UTP-glucose-1-phosphate uridylyltransferase	[c]g1p + h + utp <==> ppi + udpg	Alternate Carbon Metabolism	EC-2.7.7.9
0.4095	0.469	0.35	EC234	phosphoglucosamine mutase	[c]gam1p <==> gam6p	Cell Envelope Biosynthesis	EC-5.4.2.10
0.409	0.818	0	EC377	3-methyl-2-oxobutanoate hydroxymethyltransferase	[c]3mob + h2o + mlthf --> 2dhp + thf	Cofactor and Prosthetic Group Biosynthesis	EC-2.1.2.11
0.404	0.382	0.426	R00708	L-1-Pyrroline-5-carboxylate:NAD+ oxidoreductase	(S)-1-Pyrroline-5-carboxylate + NADP+ + 2 H2O <=> L-Glutamate + NADPH + H+	Glutamate metabolism,Arginine and proline metabolism	1.5.1.12
0.4015	0.41	0.393	EC537	cytidylate kinase (CMP)	[c]atp + cmp <==> adp + cdp	Nucleotide Salvage Pathways	EC-2.7.4.14
0.399	0.798	0	EC717	diaminopimelate epimerase	[c]26dap-LL <==> 26dap-M	Threonine and Lysine Metabolism	EC-5.1.1.7
0.3965	0.378	0.415	EC646	thioredoxin reductase (NADPH)	[c]h + nadph + trdox --> nadp + trdrd	Oxidative phosphorylation	EC-1.6.4.5
0.3935	0.235	0.552	R00845	sn-glycerol-3-phosphate:NADP+ 1-oxidoreductase	sn-Glycerol 3-phosphate + NADP+ <=> (2R)-2-Hydroxy-3-(phosphonooxy)-propanal + NADPH + H+		1.1.1.177
0.388	0.377	0.399	EC208	UTP-glucose-1-phosphate uridylyltransferase (irreversible)	[c]g1p + h + utp --> ppi + udpg	Cell Envelope Biosynthesis	EC-2.7.7.9
0.385	0.58	0.19	EC680	CTP synthase (glutamine)	[c]atp + gln-L + h2o + utp --> adp + ctp + glu-L + (2) h + pi	Purine and Pyrimidine Biosynthesis	EC-6.3.4.2
0.383	0.766	0	EC716	succinyl-diaminopimelate desuccinylase	[c]h2o + sl26da --> 26dap-LL + succ	Threonine and Lysine Metabolism	EC-3.5.1.18
0.383	0.766	0	EC715	tetrahydropicolinate succinylase	[c]h2o + succoa + thdp --> coa + sl2a6o	Threonine and Lysine Metabolism	EC-2.3.1.117
0.383	0.766	0	EC711	succinyldiaminopimelate transaminase	[c]akg + sl26da <==> glu-L + sl2a6o	Threonine and Lysine Metabolism	EC-2.6.1.17
0.379	0.318	0.44	R06847	shikimate:NAD+ 3-oxidoreductase	Shikimate + NAD+ <=> 3-Dehydroshikimate + NADH + H+		1.1.1.282
0.3765	0.326	0.427	R06613	5,10-methylenetetrahydrofolate,FADH2:dUMP C-methyltransferase	5,10-Methylenetetrahydrofolate + dUMP + FADH2 <=> Tetrahydrofolate + dTMP + FAD	Pyrimidine metabolism,One carbon pool by folate	2.1.1.148
0.375	0.41	0.34	EC329	dihydropteroate synthase	[c]4abz + 6hmhptpp --> dhpt + h + ppi	Cofactor and Prosthetic Group Biosynthesis
0.375	0.41	0.34	EC328	6-hydroxymethyl-dihydropterin pyrophosphokinase	[c]6hmhpt + atp --> 6hmhptpp + amp + h	Cofactor and Prosthetic Group Biosynthesis
0.3745	0.685	0.064	R00175	S-Adenosyl-L-methionine hydrolase	S-Adenosyl-L-methionine + H2O <=> 5\'-Methylthioadenosine + L-Homoserine		3.3.1.2
0.371	0.533	0.209	EC440	glycine hydroxymethyltransferase	[c]ser-L + thf --> gly + h2o + mlthf	Glycine and Serine Metabolism	EC-2.1.2.1
0.3705	0.443	0.298	EC480	acetyl-CoA carboxylate, reversible reaction	[c]accoa + atp + hco3 <==> adp + h + malcoa + pi	Membrane Lipid Metabolism	EC-6.4.1.2
0.369	0.728	0.01	EC896	prephenate dehydratase	[c]h + pphn --> co2 + h2o + phpyr	Tyrosine, Tryptophan, and Phenylalanine Metabolism	EC-4.2.1.51
0.369	0.328	0.41	R00985	Chorismate pyruvate-lyase (amino-accepting)	Chorismate + NH3 <=> Anthranilate + Pyruvate + H2O	Phenylalanine, tyrosine and tryptophan biosynthesis	4.1.3.27
0.3685	0.316	0.421	R05552		Chorismate + NH3 <=> 4-Amino-4-deoxychorismate + H2O	Folate biosynthesis
0.3645	0.332	0.397	EC570	ribonucleoside-diphosphate reductase (ADP)	[c]adp + trdrd --> dadp + h2o + trdox	Nucleotide Salvage Pathways	EC-1.17.4.1
0.3635	0.319	0.408	R00936	5,6,7,8-Tetrahydrofolate:NAD+ oxidoreductase	Tetrahydrofolate + NAD+ <=> Dihydrofolate + NADH + H+	One carbon pool by folate	1.5.1.3
0.363	0.38	0.346	EC374	Dihydroneopterin triphosphate pyrophosphatase	[c]ahdt + h2o --> dhpmp + h + ppi	Cofactor and Prosthetic Group Biosynthesis
0.363	0.38	0.346	EC286	Dihydroneopterin monophosphate dephosphorylase	[c]dhpmp + h2o --> dhnpt + pi	Cofactor and Prosthetic Group Biosynthesis
0.3525	0.273	0.432	EC900	tryptophan synthase (indoleglycerol phosphate)	[c]3ig3p --> g3p + indole	Tyrosine, Tryptophan, and Phenylalanine Metabolism	EC-4.2.1.20
0.3425	0.339	0.346	R01148	D-Alanine:2-oxoglutarate aminotransferase	D-Alanine + 2-Oxoglutarate <=> Pyruvate + D-Glutamate	D-Alanine metabolism	2.6.1.21
0.3415	0.429	0.254	EC324	dihydrofolate reductase	[c]dhf + h + nadph <==> nadp + thf	Cofactor and Prosthetic Group Biosynthesis	EC-1.5.1.3
0.3415	0.283	0.4	EC488	b-ketoacyl synthase	[c]acACP + h + malACP --> ACP + actACP + co2	Membrane Lipid Metabolism
0.3405	0.39	0.291	EC244	glutamate racemase	[c]glu-D <==> glu-L	Cell Envelope Biosynthesis	EC-5.1.1.3
0.34	0.675	0.005	EC719	Threonine Aldolase	[c]thr-L <==> acald + gly	Threonine and Lysine Metabolism	EC-4.1.2.5
0.34	0.307	0.373	R02060	D-Glucosamine 1-phosphate 1,6-phosphomutase; D-glucosamine 1,6-phosphomutase	alpha-D-Glucosamine 1-phosphate <=> D-Glucosamine 6-phosphate	Aminosugars metabolism	5.4.2.10
0.3385	0.148	0.529	R01221	glycine synthase	Glycine + Tetrahydrofolate + NAD+ <=> 5,10-Methylenetetrahydrofolate + NH3 + CO2 + NADH + H+	Nitrogen metabolism	2.1.2.10
0.338	0	0.676	EC372	nicotinamide-nucleotide adenylyltransferase	[c]atp + h + nmn --> nad + ppi	Cofactor and Prosthetic Group Biosynthesis	EC-2.7.7.1
0.333	0.326	0.34	R07226	acetyl-phosphate ammonia:thioredoxin disulfide oxidoreductase(glycine-forming)	Acetyl phosphate + NH3 + Oxidized thioredoxin <=> Glycine + Orthophosphate + Thioredoxin		1.21.4.2
0.331	0.534	0.128	EC373	NAD synthase (nh3)	[c]atp + dnad + nh4 --> amp + h + nad + ppi	Cofactor and Prosthetic Group Biosynthesis	EC-6.3.1.5
0.329	0.657	0.001	EC167	ornithine carbamoyltransferase	[c]cbp + orn <==> citr-L + h + pi	Arginine and Proline Metabolism	EC-2.1.3.3
0.3275	0.309	0.346	R00670	L-Ornithine carboxy-lyase	L-Ornithine <=> Putrescine + CO2	Urea cycle and metabolism of amino groups,Arginine and proline metabolism	4.1.1.17
0.3245	0.2	0.449	EC150	2,3-diketo-5-methylthio-1-phosphopentane degradation reaction	[c]dkmpp + (3) h2o --> 2kmb + for + (6) h + pi	Arginine and Proline Metabolism
0.324	0.647	0.001	EC510	cystathionine b-lyase	[c]cyst-L + h2o --> hcys-L + nh4 + pyr	Methionine Metabolism	EC-4.4.1.8
0.319	0.361	0.277	EC181	pyrroline-5-carboxylate reductase	[c]1pyr5c + (2) h + nadph --> nadp + pro-L	Arginine and Proline Metabolism	EC-1.5.1.2
0.3085	0.206	0.411	EC156	2,3-diketo-5-methylthio-1-phosphopentane degradation reaction	[c]dkmpp + h2o + o2 --> 2kmb + for + (2) h + pi	Arginine and Proline Metabolism
0.3025	0.232	0.373	EC571	ribonucleoside-diphosphate reductase (GDP)	[c]gdp + trdrd --> dgdp + h2o + trdox	Nucleotide Salvage Pathways	EC-1.17.4.1
0.301	0.59	0.012	EC907	tyrosine transaminase	[c]akg + tyr-L <==> 34hpp + glu-L	Tyrosine, Tryptophan, and Phenylalanine Metabolism	EC-2.6.1.5
0.2955	0.396	0.195	EC592	5'-nucleotidase (CMP)	[c]cmp + h2o --> cytd + pi	Nucleotide Salvage Pathways	EC-3.1.3.5
0.2955	0.265	0.326	R01248	L-Proline:NAD+ 5-oxidoreductase	L-Proline + NAD+ <=> (S)-1-Pyrroline-5-carboxylate + NADH + H+	Urea cycle and metabolism of amino groups,Arginine and proline metabolism	1.5.1.2
0.2955	0.25	0.341	R01067	D-Fructose 6-phosphate:D-glyceraldehyde-3-phosphate glycolaldehyde transferase	D-Fructose 6-phosphate + (2R)-2-Hydroxy-3-(phosphonooxy)-propanal <=> D-Erythrose 4-phosphate + D-Xylulose 5-phosphate	Carbon fixation	2.2.1.1
0.2925	0.584	0.001	R04209	1-(5-Phospho-D-ribosyl)-5-amino-4-imidazolecarboxylate carboxy-lyase	1-(5-Phospho-D-ribosyl)-5-amino-4-imidazolecarboxylate <=> Aminoimidazole ribotide + CO2	Purine metabolism	4.1.1.21
0.292	0.584	0	EC164	acetylornithine deacetylase	[c]acorn + h2o --> ac + orn	Arginine and Proline Metabolism	EC-3.5.1.16
0.291	0.383	0.199	EC655	transketolase	[c]e4p + xu5p-D <==> f6p + g3p	Pentose Phosphate Cycle	EC-2.2.1.1
0.289	0.576	0.002	EC667	phosphoribosylaminoimidazolecarboxamide formyltransferase	[c]10fthf + aicar <==> fprica + thf	Purine and Pyrimidine Biosynthesis	EC-2.1.2.3
0.2885	0.577	0	EC422	Sulfate adenyltransferase	[c]atp + gtp + h2o + so4 --> aps + gdp + pi + ppi	Cysteine Metabolism
0.2885	0.25	0.327	R04230	(R)-4\'-Phosphopantothenate:L-cysteine ligase	ATP + D-4\'-Phosphopantothenate + L-Cysteine <=> ADP + Orthophosphate + (R)-4\'-Phosphopantothenoyl-L-cysteine	Pantothenate and CoA biosynthesis	6.3.2.5
0.2835	0.333	0.234	EC297	phosphopantothenate-cysteine ligase	[c]4ppan + ctp + cys-L --> 4ppcys + cmp + h + ppi	Cofactor and Prosthetic Group Biosynthesis	EC-6.3.2.5
0.2825	0.443	0.122	R07176	AMP,sulfite:thioredoxin-disulfide oxidoreductase(adenosine-5\'-phosphosulfate-forming)	AMP + Sulfite + Oxidized thioredoxin <=> Adenylylsulfate + Thioredoxin		1.8.4.10
0.282	0.561	0.003	EC927	leucine transaminase (irreversible)	[c]4mop + glu-L --> akg + leu-L	Valine, leucine, and isoleucine metabolism	EC-2.6.1.42
0.281	0.562	0	EC714	dihydrodipicolinate reductase (NADPH)	[c]23dhdp + h + nadph --> nadp + thdp	Threonine and Lysine Metabolism	EC-1.3.1.26
0.281	0.558	0.004	EC161	N-acetyl-g-glutamyl-phosphate reductase	[c]acg5sa + nadp + pi <==> acg5p + h + nadph	Arginine and Proline Metabolism	EC-1.2.1.38
0.281	0.558	0.004	EC160	acetylglutamate kinase	[c]acglu + atp --> acg5p + adp	Arginine and Proline Metabolism	EC-2.7.2.8
0.2795	0.247	0.312	R04233	(R)-4\'-Phosphopantothenate:L-cysteine ligase	CTP + D-4\'-Phosphopantothenate + L-Cysteine <=> CDP + Orthophosphate + (R)-4\'-Phosphopantothenoyl-L-cysteine	Pantothenate and CoA biosynthesis	6.3.2.5
0.276	0.552	0	EC666	glutamine phosphoribosyldiphosphate amidotransferase	[c]gln-L + h2o + prpp --> glu-L + ppi + pram	Purine and Pyrimidine Biosynthesis	EC-2.4.2.14
0.2715	0.347	0.196	R00571	UTP:ammonia ligase(ADP-forming)	ATP + UTP + NH3 <=> ADP + Orthophosphate + CTP	Pyrimidine metabolism	6.3.4.2
0.2715	0.046	0.497	EC533	adenine phosphoribosyltransferase	[c]ade + prpp --> amp + ppi	Nucleotide Salvage Pathways	EC-2.4.2.7
0.2675	0.511	0.024	EC712	aspartate-semialdehyde dehydrogenase	[c]aspsa + nadp + pi <==> 4pasp + h + nadph	Threonine and Lysine Metabolism	EC-1.2.1.11
0.262	0.381	0.143	R00257	Deamido-NAD+:L-glutamine amido-ligase (AMP-forming)	ATP + Deamino-NAD+ + L-Glutamine + H2O <=> AMP + Pyrophosphate + NAD+ + L-Glutamate	Glutamate metabolism,Nicotinate and nicotinamide metabolism	6.3.5.1
0.2605	0.52	0.001	EC278	isocitrate dehydrogenase (NADP)	[c]icit + nadp <==> akg + co2 + nadph	Citrate Cycle (TCA)	EC-1.1.1.42
0.2565	0.51	0.003	EC918	L-threonine deaminase	[c]thr-L --> 2obut + nh4	Valine, leucine, and isoleucine metabolism
0.2505	0.212	0.289	R01224	5-Methyltetrahyfrofolate:(acceptor) oxidoreductase; 5-Methyltetrahydrofolate:NADP+ oxidoreductase	5-Methyltetrahydrofolate + NADP+ <=> 5,10-Methylenetetrahydrofolate + NADPH + H+	One carbon pool by folate,Methane metabolism	1.5.1.20
0.249	0.173	0.325	EC178	methylthioadenosine nucleosidase	[c]5mta + h2o --> 5mtr + ade	Arginine and Proline Metabolism	EC-3.2.2.16
0.249	0.173	0.325	EC154	5-methylthioribose kinase	[c]5mtr + atp --> 5mdr1p + adp + h	Arginine and Proline Metabolism	EC-2.7.1.100
0.247	0.464	0.03	EC721	homoserine dehydrogenase (NADPH)	[c]hom-L + nadp <==> aspsa + h + nadph	Threonine and Lysine Metabolism	EC-1.1.1.3
0.246	0.491	0.001	EC277	citrate synthase	[c]accoa + h2o + oaa --> cit + coa + h	Citrate Cycle (TCA)	EC-4.1.3.7
0.2455	0.211	0.28	R00572	CTP:pyruvate O2-phosphotransferase	CTP + Pyruvate <=> CDP + Phosphoenolpyruvate		2.7.1.40
0.244	0.488	0	EC162	acetylornithine transaminase	[c]acorn + akg <==> acg5sa + glu-L	Arginine and Proline Metabolism	EC-2.6.1.11
0.244	0.484	0.004	EC159	N-acetylglutamate synthase	[c]accoa + glu-L --> acglu + coa + h	Arginine and Proline Metabolism	EC-2.3.1.1
0.2405	0.229	0.252	EC464	triose-phosphate isomerase	[c]dhap <==> g3p	Glycolysis/Gluconeogenesis	EC-5.3.1.1
0.24	0.197	0.283	R00432	Succinate:CoA ligase (GDP-forming)	GTP + Succinate + CoA <=> GDP + Orthophosphate + Succinyl-CoA	Citrate cycle (TCA cycle),Propanoate metabolism	6.2.1.4
0.24	0.184	0.296	R01829	Sedoheptulose 1,7-bisphosphate D-glyceraldehyde-3-phosphate-lyase	Sedoheptulose 1,7-bisphosphate <=> Glycerone phosphate + D-Erythrose 4-phosphate	Carbon fixation	4.1.2.13
0.239	0.207	0.271	EC573	ribonucleoside-diphosphate reductase (CDP)	[c]cdp + trdrd --> dcdp + h2o + trdox	Nucleotide Salvage Pathways	EC-1.17.4.1
0.2385	0.2	0.277	R00761	D-Fructose-6-phosphate D-erythrose-4-phosphate-lyase	D-Fructose 6-phosphate + Orthophosphate <=> Acetyl phosphate + D-Erythrose 4-phosphate + H2O	Pentose phosphate pathway,Carbon fixation	4.1.2.9 4.1.2.22
0.2355	0.36	0.111	EC452	fructose 6-phosphate aldolase	[c]f6p <==> dha + g3p	Glycolysis/Gluconeogenesis
0.2355	0.333	0.138	EC450	fructose-bisphosphate aldolase	[c]fdp <==> dhap + g3p	Glycolysis/Gluconeogenesis	EC-4.1.2.13
0.2345	0.188	0.281	R01222	5-Methyltetrahyfrofolate:(acceptor) oxidoreductase	5,10-Methylenetetrahydrofolate + FADH2 <=> 5-Methyltetrahydrofolate + FAD	One carbon pool by folate,Methane metabolism	1.5.1.20
0.2325	0.099	0.366	R00265	2-Oxoglutarate:NADP+ 2-oxidoreductase (CoA-succinylating)	2-Oxoglutarate + CoA + NADP+ <=> Succinyl-CoA + CO2 + NADPH		1.2.1.52
0.232	0.221	0.243	R01621	D-Xylulose 5-phosphate D-glyceraldehyde-3-phosphate-lyase	D-Xylulose 5-phosphate + Orthophosphate <=> Acetyl phosphate + (2R)-2-Hydroxy-3-(phosphonooxy)-propanal + H2O	Pentose phosphate pathway,Methane metabolism,Carbon fixation	4.1.2.9
0.2285	0.253	0.204	EC157	L-glutamate 5-semialdehyde dehydratase (spontaneous)	[c]glu5sa --> 1pyr5c + h + h2o	Arginine and Proline Metabolism
0.2255	0.366	0.085	R00860	AMP,sulfite:(acceptor) oxidoreductase	Sulfite + Acceptor + AMP <=> Adenylylsulfate + Reduced acceptor	Sulfur metabolism	1.8.99.2
0.225	0.288	0.162	EC432	5,10-methylenetetrahydrofolate reductase (NADH)	[c]h + mlthf + nadh --> 5mthf + nad	Folate Metabolism
0.2245	0.448	0.001	R06975	5-formaminoimidazole-4-carboxamide-1-beta-D-ribofuranosyl 5\'-monophosphate synthetase	Formate + ATP + 1-(5\'-Phosphoribosyl)-5-amino-4-imidazolecarboxamide <=> ADP + Orthophosphate + 1-(5\'-Phosphoribosyl)-5-formamido-4-imidazolecarboxamide		6.3.4.-
0.22	0.438	0.002	R07274	O-phospho-L-serine:hydrogen-sulfide 2-amino-2-carboxyethyltransferase	O-Phospho-L-serine + Hydrogen sulfide <=> L-Cysteine + Orthophosphate		2.5.1.65
0.22	0.02	0.42	EC553	guanosine kinase	[c]atp + gsn --> adp + gmp + h	Nucleotide Salvage Pathways
0.217	0.43	0.004	EC672	phosphoribosylglycinamide formyltransferase	[c]10fthf + gar <==> fgam + h + thf	Purine and Pyrimidine Biosynthesis	EC-2.1.2.2
0.215	0.427	0.003	EC673	GAR transformylase-T	[c]atp + for + gar --> adp + fgam + h + pi	Purine and Pyrimidine Biosynthesis
0.214	0.29	0.138	R00726	ITP:oxaloacetate carboxy-lyase (transphosphorylating)	ITP + Oxaloacetate <=> IDP + Phosphoenolpyruvate + CO2	Citrate cycle (TCA cycle),Pyruvate metabolism	4.1.1.32
0.2125	0.425	0	R01398	Carbamoyl-phosphate:L-ornithine carbamoyltransferase	Carbamoyl phosphate + L-Ornithine <=> Orthophosphate + L-Citrulline	Urea cycle and metabolism of amino groups,Arginine and proline metabolism	2.1.3.3
0.2115	0.233	0.19	EC650	phosphogluconate dehydrogenase	[c]6pgc + nadp --> co2 + nadph + ru5p-D	Pentose Phosphate Cycle	EC-1.1.1.44
0.2085	0.184	0.233	EC567	nucleoside-diphosphate kinase (ATP:dCDP)	[c]atp + dcdp <==> adp + dctp	Nucleotide Salvage Pathways	EC-2.7.4.6
0.204	0.407	0.001	EC147	phosphoenolpyruvate carboxylase	[c]co2 + h2o + pep --> h + oaa + pi	Anaplerotic reactions	EC-4.1.1.31
0.2015	0.281	0.122	EC912	HCO3 equilibration reaction	[c]co2 + h2o <==> h + hco3	Unassigned
0.2015	0.169	0.234	R01576	3-Deoxy-D-manno-octulosonate D-arabinose-lyase	3-Deoxy-D-manno-octulosonate <=> Pyruvate + D-Arabinose		4.1.2.23
0.198	0.393	0.003	R01001	L-Cystathionine Lysteine-lyase (deaminating)	L-Cystathionine + H2O <=> L-Cysteine + NH3 + 2-Oxobutanoate	Glycine, serine and threonine metabolism,Methionine metabolism,Nitrogen metabolism	4.4.1.1
0.1975	0.007	0.388	EC551	guanine phosphoribosyltransferase	[c]gua + prpp --> gmp + ppi	Nucleotide Salvage Pathways
0.1965	0.224	0.169	R00245	L-Glutamate 5-semialdehyde:NAD+ oxidoreductase	L-Glutamate 5-semialdehyde + NAD+ + H2O <=> L-Glutamate + NADH + H+	Arginine and proline metabolism	1.5.1.12
0.195	0.228	0.162	EC546	dUTP diphosphatase	[c]dutp + h2o --> dump + h + ppi	Nucleotide Salvage Pathways	EC-3.6.1.23
0.194	0.388	0	EC724	threonine synthase	[c]h2o + phom --> pi + thr-L	Threonine and Lysine Metabolism	EC-4.2.3.1
0.194	0.388	0	EC723	homoserine kinase	[c]atp + hom-L --> adp + h + phom	Threonine and Lysine Metabolism	EC-2.7.1.39
0.194	0.385	0.003	R00782	L-Cysteine L-homocysteine-lyase (deaminating)	L-Cysteine + H2O <=> Hydrogen sulfide + Pyruvate + NH3	Cysteine metabolism	4.4.1.1 4.4.1.8
0.1915	0.129	0.254	R00430	GTP:pyruvate O2-phosphotransferase	GTP + Pyruvate <=> GDP + Phosphoenolpyruvate	Purine metabolism	2.7.1.40
0.1865	0.216	0.157	R00344	Pyruvate:carbon-dioxide ligase (ADP-forming)	ATP + Pyruvate + HCO3- <=> ADP + Orthophosphate + Oxaloacetate	Citrate cycle (TCA cycle),Alanine and aspartate metabolism,Pyruvate metabolism	6.4.1.1
0.186	0.372	0	EC669	phosphoribosylaminoimidazole carboxylase	[c]air + atp + hco3 --> 5caiz + adp + h + pi	Purine and Pyrimidine Biosynthesis
0.186	0.372	0	EC665	phosphoribosylaminoimidazole carboxylase (mutase rxn)	[c]5aizc <==> 5caiz	Purine and Pyrimidine Biosynthesis
0.186	0.153	0.219	EC898	Tryptophanase (L-tryptophan)	[c]h2o + trp-L <==> indole + nh4 + pyr	Tyrosine, Tryptophan, and Phenylalanine Metabolism	EC-4.1.99.1
0.1855	0.182	0.189	EC578	uridylate kinase (dUMP)	[c]atp + dump <==> adp + dudp	Nucleotide Salvage Pathways
0.185	0.367	0.003	R01088	L-leucine:NAD+ oxidoreductase(deaminating)	L-Leucine + H2O + NAD+ <=> 4-Methyl-2-oxopentanoate + NH3 + NADH + H+	Valine, leucine and isoleucine degradation,Valine, leucine and isoleucine biosynthesis	1.4.1.9
0.184	0.126	0.242	R00346	Pyrophosphate:oxaloacetate carboxy-lyase (transphosphorylating)	Pyrophosphate + Oxaloacetate <=> Orthophosphate + Phosphoenolpyruvate + CO2	Pyruvate metabolism	4.1.1.38
0.1835	0.367	0	R04198	2,3,4,5-Tetrahydrodipicolinate:NAD+ oxidoreductase	2,3,4,5-Tetrahydrodipicolinate + NAD+ <=> L-2,3-Dihydrodipicolinate + NADH + H+	Lysine biosynthesis	1.3.1.26
0.1835	0.123	0.244	R01197		Reduced ferredoxin + Succinyl-CoA + CO2 <=> Oxidized ferredoxin + 2-Oxoglutarate + CoA	Citrate cycle (TCA cycle),Reductive carboxylate cycle (CO2 fixation)	1.2.7.3
0.182	0.228	0.136	EC063	gluconokinase	[c]atp + glcn --> 6pgc + adp + h	Alternate Carbon Metabolism	EC-2.7.1.12
0.179	0.145	0.213	EC899	tryptophan synthase (indole)	[c]indole + ser-L --> h2o + trp-L	Tyrosine, Tryptophan, and Phenylalanine Metabolism	EC-4.2.1.20
0.1785	0.352	0.005	R00529	ATP:sulfate adenylyltransferase	ATP + Sulfate <=> Pyrophosphate + Adenylylsulfate	Purine metabolism,Sulfur metabolism	2.7.7.4
0.178	0.351	0.005	R00709	Isocitrate:NAD+ oxidoreductase (decarboxylating)	Isocitrate + NAD+ <=> 2-Oxoglutarate + CO2 + NADH + H+	Citrate cycle (TCA cycle)	1.1.1.41 1.1.1.286
0.1755	0.351	0	EC508	homoserine O-succinyltransferase	[c]hom-L + succoa --> coa + suchms	Methionine Metabolism	EC-2.3.1.46
0.174	0.347	0.001	R01053	Ribose-5-phosphate:ammonia ligase (ADP-forming)	ATP + D-Ribose 5-phosphate + NH3 <=> ADP + Orthophosphate + 5-Phosphoribosylamine	Purine metabolism	6.3.4.7
0.174	0.149	0.199	R00659	UTP:pyruvate O2-phosphotransferase	UTP + Pyruvate <=> UDP + Phosphoenolpyruvate		2.7.1.40
0.172	0.146	0.198	EC495	Acetyl-CoA ACP transacylase	[c]ACP + accoa <==> acACP + coa	Membrane Lipid Metabolism	EC-2.3.1.38
0.1695	0.338	0.001	EC681	Carbamate kinase	[c]atp + co2 + nh4 --> adp + cbp + (2) h	Putative	EC-2.7.2.2
0.168	0.334	0.002	R00352	ATP:citrate oxaloacetate-lyase ((pro-3S)-CH2COO- ->acetyl-CoA) (ATP-dephosphorylating)	ATP + Citrate + CoA <=> ADP + Orthophosphate + Acetyl-CoA + Oxaloacetate	Citrate cycle (TCA cycle),Reductive carboxylate cycle (CO2 fixation)	2.3.3.8
0.165	0.143	0.187	EC184	arginine decarboxylase	[c]arg-L + h --> agm + co2	Arginine and Proline Metabolism	EC-4.1.1.19
0.164	0.3	0.028	R01773	L-Homoserine:NAD+ oxidoreductase	L-Homoserine + NAD+ <=> L-Aspartate 4-semialdehyde + NADH + H+	Glycine, serine and threonine metabolism,Lysine biosynthesis	1.1.1.3
0.164	0.152	0.176	R01860	4-Aminobenzoate carboxy-lyase	4-Aminobenzoate <=> Aniline + CO2		4.1.1.24
0.164	0.152	0.176	R00990	2-Aminobenzoate carboxy-lyase	Anthranilate <=> Aniline + CO2		4.1.1.24
0.1635	0.28	0.047	R01058	D-glyceraldehyde 3-phosphate:NADP+ oxidoreductase	(2R)-2-Hydroxy-3-(phosphonooxy)-propanal + NADP+ + H2O <=> 3-Phospho-D-glycerate + NADPH + H+		1.2.1.9
0.1635	0.126	0.201	R00320	Pyrophosphate:acetate phosphotransferase	Pyrophosphate + Acetate <=> Orthophosphate + Acetyl phosphate	Pyruvate metabolism	2.7.2.12
0.1625	0.321	0.004	EC906	prephenate dehydrogenase	[c]nad + pphn --> 34hpp + co2 + nadh	Tyrosine, Tryptophan, and Phenylalanine Metabolism	EC-1.3.1.12
0.1615	0.129	0.194	R02086	N-Acetyl-D-glucosamine 1-phosphate 1,6-phosphomutase	N-Acetyl-D-glucosamine 6-phosphate <=> N-Acetyl-D-glucosamine 1-phosphate	Aminosugars metabolism	5.4.2.3
0.1615	0.121	0.202	EC487	Malonyl-ACP decarboxylase	[c]h + malACP --> acACP + co2	Membrane Lipid Metabolism
0.1605	0.14	0.181	R00767	CTP:D-fructose-6-phosphate 1-phosphotransferase	CTP + D-Fructose 6-phosphate <=> CDP + D-Fructose 1,6-bisphosphate		2.7.1.11
0.16	0.285	0.035	R02291	L-Aspartate-4-semialdehyde:NADP+ oxidoreductase (phosphorylating)	L-Aspartate 4-semialdehyde + Orthophosphate + NADP+ <=> 4-Phospho-L-aspartate + NADPH + H+	Glycine, serine and threonine metabolism,Lysine biosynthesis	1.2.1.11
0.16	0.15	0.17	R00769	UTP:D-fructose-6-phosphate 1-phosphotransferase	UTP + D-Fructose 6-phosphate <=> UDP + D-Fructose 1,6-bisphosphate		2.7.1.11
0.16	0.102	0.218	EC521	CMP nucleosidase	[c]cmp + h2o --> csn + r5p	Nucleotide Salvage Pathways	EC-3.2.2.10
0.1565	0.151	0.162	R02038	CTP:ethanolamine-phosphate cytidylyltransferase	CTP + Ethanolamine phosphate <=> Pyrophosphate + CDP-ethanolamine	Glycerophospholipid metabolism	2.7.7.14
0.1555	0.134	0.177	EC431	Glycine Cleavage System	[c]gly + nad + thf --> co2 + mlthf + nadh + nh4	Folate Metabolism
0.1545	0.151	0.158	R00764	Pyrophosphate:D-fructose-6-phosphate 1-phosphotransferase	Pyrophosphate + D-Fructose 6-phosphate <=> Orthophosphate + D-Fructose 1,6-bisphosphate		2.7.1.90
0.154	0.084	0.224	R01858	dATP:pyruvate O2-phosphotransferase	dGTP + Pyruvate <=> dGDP + Phosphoenolpyruvate	Purine metabolism	2.7.1.40
0.1535	0.142	0.165	R00157	Uridine triphosphate:AMP phosphotransferase	UTP + AMP <=> UDP + ADP	Pyrimidine metabolism	2.7.4.10
0.153	0.303	0.003	EC006	asparagine synthase (glutamine-hydrolysing)	[c]asp-L + atp + gln-L + h2o --> amp + asn-L + glu-L + h + ppi	Alanine and aspartate metabolism	EC-6.3.5.4
0.153	0.008	0.298	EC602	purine-nucleoside phosphorylase (Adenosine)	[c]adn + pi <==> ade + r1p	Nucleotide Salvage Pathways	EC-2.4.2.1
0.1525	0.202	0.103	R00667	L-Ornithine:2-oxo-acid aminotransferase	L-Ornithine + 2-Oxoglutarate <=> L-Glutamate 5-semialdehyde + L-Glutamate	Urea cycle and metabolism of amino groups,Arginine and proline metabolism	2.6.1.13
0.152	0.132	0.172	R01573	ATP:D-arabinose 5-phosphotransferase	ATP + D-Arabinose <=> ADP + D-Arabinose 5-phosphate		2.7.1.54
0.1505	0.123	0.178	R01217	5-methyltetrahydrofolate:ferredoxin oxidoreductase	5,10-Methylenetetrahydrofolate + Reduced ferredoxin <=> 5-Methyltetrahydrofolate + Oxidized ferredoxin	One carbon pool by folate	1.5.7.1 1.7.7.-
0.149	0.124	0.174	R02058	Acetyl-CoA:D-glucosamine-6-phosphate N-acetyltransferase	Acetyl-CoA + D-Glucosamine 6-phosphate <=> CoA + N-Acetyl-D-glucosamine 6-phosphate	Glutamate metabolism,Aminosugars metabolism	2.3.1.4
0.1485	0.134	0.163	R05839	pyridoxamine:2-oxoglutarate aminotransferase	Pyridoxamine + 2-Oxoglutarate <=> Pyridoxal + D-Glutamate	Vitamin B6 metabolism	2.6.1.54
0.148	0.296	0	EC509	O-succinylhomoserine lyase (L-cysteine)	[c]cys-L + suchms --> cyst-L + h + succ	Methionine Metabolism	EC-4.2.99.9
0.148	0.296	0	EC005	asparagine synthetase	[c]asp-L + atp + nh4 --> amp + asn-L + h + ppi	Alanine and aspartate metabolism	EC-6.3.1.1
0.1475	0.164	0.131	EC577	ribonucleoside-triphosphate reductase (UTP)	[c]trdrd + utp --> dutp + h2o + trdox	Nucleotide Salvage Pathways	EC-1.17.4.2
0.1475	0	0.295	R00568	CTP aminohydrolase	CTP + H2O <=> UTP + NH3	Pyrimidine metabolism	3.5.4.13
0.147	0.286	0.008	EC429	methenyltetrahydrofolate cyclohydrolase	[c]h2o + methf <==> 10fthf	Folate Metabolism	EC-3.5.4.9
0.1465	0.292	0.001	R02200	Valine:(S)-3-methyl-2-oxopentanoate aminotransferase	L-Valine + (S)-3-Methyl-2-oxopentanoic acid <=> 3-Methyl-2-oxobutanoic acid + L-Isoleucine		2.6.1.32
0.144	0.202	0.086	EC528	adentylate kinase (GTP)	[c]amp + gtp <==> adp + gdp	Nucleotide Salvage Pathways
0.144	0.118	0.17	R01846	CTP:Sedoheptulose 7-phosphate 1-phosphotransferase	CTP + Sedoheptulose 7-phosphate <=> CDP + Sedoheptulose 1,7-bisphosphate		2.7.1.11
0.142	0.129	0.155	EC565	nucleoside-diphosphate kinase (ATP:dGDP)	[c]atp + dgdp <==> adp + dgtp	Nucleotide Salvage Pathways	EC-2.7.4.6
0.142	0.111	0.173	R01830	beta-D-Fructose 6-phosphate:D-glyceraldehyde-3-phosphate glycolaldehyde transferase	beta-D-Fructose 6-phosphate + (2R)-2-Hydroxy-3-(phosphonooxy)-propanal <=> D-Erythrose 4-phosphate + D-Xylulose 5-phosphate	Pentose phosphate pathway	2.2.1.1
0.138	0.133	0.143	R01663	dCMP aminohydrolase	dCMP + H2O <=> dUMP + NH3	Pyrimidine metabolism	3.5.4.12
0.138	0.126	0.15	R00748	Ethanolamine-phosphate phospho-lyase (deaminating)	Ethanolamine phosphate + H2O <=> Acetaldehyde + NH3 + Orthophosphate		4.2.3.2
0.137	0.135	0.139	EC572	ribonucleoside-diphosphate reductase (UDP)	[c]trdrd + udp --> dudp + h2o + trdox	Nucleotide Salvage Pathways	EC-1.17.4.1
0.136	0.12	0.152	EC185	agmatinase	[c]agm + h2o --> ptrc + urea	Arginine and Proline Metabolism	EC-3.5.3.11
0.1315	0.081	0.182	EC539	Cytosine deaminase	[c]csn + h + h2o --> nh4 + ura	Nucleotide Salvage Pathways	EC-3.5.4.1
0.1315	0.008	0.255	EC534	cytidine deaminase	[c]cytd + h + h2o --> nh4 + uri	Nucleotide Salvage Pathways	EC-3.5.4.5
0.13	0.11	0.15	R01847	UTP:Sedoheptulose 7-phosphate 1-phosphotransferase	UTP + Sedoheptulose 7-phosphate <=> UDP + Sedoheptulose 1,7-bisphosphate		2.7.1.11
0.1295	0.095	0.164	R04180	6-(D-Glucose-1-phospho)-D-mannosylglycoprotein glucose-1-phosphohydrolase	6-(D-Glucose-1-phospho)-D-mannosylglycoprotein + H2O <=> D-Glucose 1-phosphate + D-Mannosylglycoprotein		3.1.4.51
0.1295	0.095	0.164	R04179	UDPglucose:glycoprotein-D-mannose glucosephosphotransferase	UDP-glucose + D-Mannosylglycoprotein <=> UMP + 6-(D-Glucose-1-phospho)-D-mannosylglycoprotein		2.7.8.19
0.1285	0.251	0.006	EC173	carbamoyl-phosphate synthase (glutamine-hydrolysing)	[c](2) atp + gln-L + h2o + hco3 --> (2) adp + cbp + glu-L + (2) h + pi	Arginine and Proline Metabolism	EC-6.3.5.5
0.1285	0.231	0.026	EC710	pyruvate formate lyase	[c]coa + pyr --> accoa + for	Pyruvate metabolism	EC-Undetermined
0.127	0.004	0.25	EC586	uracil phosphoribosyltransferase	[c]prpp + ura --> ppi + ump	Nucleotide Salvage Pathways	EC-2.4.2.9
0.126	0.252	0	EC003	alanine racemase	[c]ala-L <==> ala-D	Alanine and aspartate metabolism	EC-5.1.1.1
0.126	0.105	0.147	R05805	ADP:D-fructose-6-phosphate 1-phosphotransferase	ADP + D-Fructose 6-phosphate <=> AMP + D-Fructose 1,6-bisphosphate		2.7.1.146
0.1245	0.248	0.001	EC425	sulfite reductase (NADPH2)	[c](3) h2o + h2s + (3) nadp <==> (5) h + (3) nadph + so3	Cysteine Metabolism	EC-1.8.2.2
0.124	0.248	0	EC925	isoleucine transaminase	[c]akg + ile-L <==> 3mop + glu-L	Valine, leucine, and isoleucine metabolism	EC-2.6.1.42
0.124	0.236	0.012	R00691	L-Arogenate hydro-lyase (decarboxylating)	L-Arogenate <=> L-Phenylalanine + H2O + CO2	Phenylalanine, tyrosine and tryptophan biosynthesis	4.2.1.51 4.2.1.91
0.124	0.096	0.152	R00848	sn-Glycerol-3-phosphate:(acceptor) 2-oxidoreductase	sn-Glycerol 3-phosphate + FAD <=> Glycerone phosphate + FADH2	Glycerophospholipid metabolism	1.1.99.5
0.123	0.245	0.001	R00482	L-Aspartate:ammonia ligase (ADP-forming)	ATP + L-Aspartate + NH3 <=> ADP + Orthophosphate + L-Asparagine	Nitrogen metabolism	6.3.1.4
0.123	0.242	0.004	R01776	Acetyl-CoA:L-homoserine O-acetyltransferase	Acetyl-CoA + L-Homoserine <=> CoA + O-Acetyl-L-homoserine	Methionine metabolism,Sulfur metabolism	2.3.1.31
0.1225	0.239	0.006	R00149	Carbon-dioxide:ammonia ligase (ADP-forming,carbamate-phosphorylating)	2 ATP + NH3 + CO2 + H2O <=> 2 ADP + Orthophosphate + Carbamoyl phosphate	Urea cycle and metabolism of amino groups,Glutamate metabolism,Arginine and proline metabolism,Nitrogen metabolism	6.3.4.16
0.122	0.216	0.028	R00943	Formate:tetrahydrofolate ligase (ADP-forming)	Tetrahydrofolate + Formate + ATP <=> ADP + Orthophosphate + 10-Formyltetrahydrofolate	Glyoxylate and dicarboxylate metabolism,One carbon pool by folate	3.5.4.9 6.3.4.3
0.121	0.178	0.064	EC563	nucleoside-diphosphate kinase (ATP:UDP)	[c]atp + udp <==> adp + utp	Nucleotide Salvage Pathways	EC-2.7.4.6
0.121	0.166	0.076	EC562	nucleoside-diphosphate kinase (ATP:GDP)	[c]atp + gdp <==> adp + gtp	Nucleotide Salvage Pathways	EC-2.7.4.6
0.1205	0.1	0.141	R06836	Ribose 1,5-biphosphokinase	D-Ribose 1,5-bisphosphate + ATP <=> 5-Phospho-alpha-D-ribose 1-diphosphate + ADP	Pentose phosphate pathway
0.1205	0.1	0.141	R01050	ATP:D-ribose-5-phosphate 1-phosphotransferase	ATP + D-Ribose 5-phosphate <=> ADP + D-Ribose 1,5-bisphosphate		2.7.1.18
0.1205	0.004	0.237	EC603	purine-nucleoside phosphorylase (Guanosine)	[c]gsn + pi <==> gua + r1p	Nucleotide Salvage Pathways	EC-2.4.2.1
0.12	0.232	0.008	R01730	Prephenate:NADP+ oxidoreductase(decarboxylating)	Prephenate + NADP+ <=> 3-(4-Hydroxyphenyl)pyruvate + CO2 + NADPH + H+	Phenylalanine, tyrosine and tryptophan biosynthesis	1.3.1.13 1.3.1.43
0.1195	0.086	0.153	R00085	ATP diphosphohydrolase	ATP + 2 H2O <=> AMP + 2 Orthophosphate		3.6.1.5
0.119	0.146	0.092	R07164	L-aspartate:NAD+ oxidoreductase (deaminating)	L-Aspartate + H2O + NAD+ <=> Oxaloacetate + NH3 + NADH + H+		1.4.1.21
0.119	0.102	0.136	R01568	ADP:thymidine 5\'-phosphotransferase	ADP + Thymidine <=> AMP + dTMP		2.7.1.118
0.1185	0.182	0.055	EC564	nucleoside-diphosphate kinase (ATP:CDP)	[c]atp + cdp <==> adp + ctp	Nucleotide Salvage Pathways	EC-2.7.4.6
0.1175	0.186	0.049	R00695	L-Aspartate:phenylpyruvate aminotransferase	L-Aspartate + Phenylpyruvate <=> Oxaloacetate + L-Phenylalanine		2.6.1.70
0.117	0.135	0.099	R00208	Phosphoenolpyruvate phosphohydrolase	Phosphoenolpyruvate + H2O <=> Pyruvate + Orthophosphate		3.1.3.60
0.117	0.127	0.107	R00206	ATP:pyruvate,orthophosphate phosphotransferase	ATP + Pyruvate + Orthophosphate <=> AMP + Phosphoenolpyruvate + Pyrophosphate	Pyruvate metabolism,Carbon fixation	2.7.9.1
0.1165	0.197	0.036	R00740	3-Oxopropanoate:NADP+ oxidoreductase (decarboxylating, CoA-acetylating)	3-Oxopropanoate + CoA + NADP+ <=> Malonyl-CoA + NADPH	Propanoate metabolism	1.2.1.18
0.1165	0.117	0.116	R01469	Ethanolamine:oxygen oxidoreductase (deaminating)	Ethanolamine + H2O + Oxygen <=> Glycolaldehyde + NH3 + H2O2		1.4.3.8
0.116	0.027	0.205	EC029	phosphopentomutase	[c]r1p <==> r5p	Alternate Carbon Metabolism	EC-5.4.2.7
0.1145	0.141	0.088	R07165	L-aspartate:NADP+ oxidoreductase (deaminating)	L-Aspartate + H2O + NADP+ <=> Oxaloacetate + NH3 + NADPH + H+		1.4.1.21
0.1145	0.051	0.178	R01827	Sedoheptulose-7-phosphate:D-glyceraldehyde-3-phosphate glyceronetransferase	D-Sedoheptulose 7-phosphate + (2R)-2-Hydroxy-3-(phosphonooxy)-propanal <=> D-Erythrose 4-phosphate + D-Fructose 6-phosphate	Pentose phosphate pathway	2.2.1.2
0.1135	0.041	0.186	R00551	L-Arginine amidinohydrolase	L-Arginine + H2O <=> L-Ornithine + Urea	Urea cycle and metabolism of amino groups,Arginine and proline metabolism	3.5.3.1
0.113	0.222	0.004	EC430	methylenetetrahydrofolate dehydrogenase (NADP)	[c]mlthf + nadp <==> h + methf + nadph	Folate Metabolism	EC-1.5.1.5
0.112	0.104	0.12	R01138	dATP:pyruvate O2-phosphotransferase	dATP + Pyruvate <=> dADP + Phosphoenolpyruvate	Purine metabolism	2.7.1.40
0.11	0.199	0.021	R05861	D-alanine:oxygen oxidoreductase (deaminating)	D-Alanine + H2O + Oxygen <=> Pyruvate + NH3 + H2O2		1.4.3.3 1.4.3.19
0.109	0.218	0	R02196	L-Isoleucine:NAD+ oxidoreductase(deaminating)	L-Isoleucine + NAD+ + H2O <=> (S)-3-Methyl-2-oxopentanoic acid + NH3 + NADH + H+	Valine, leucine and isoleucine biosynthesis	1.4.1.9
0.1065	0.107	0.106	R00849	sn-Glycerol-3-phosphate:(acceptor) 2-oxidoreductase	sn-Glycerol 3-phosphate + Acceptor <=> Glycerone phosphate + Reduced acceptor		1.1.99.4 1.1.99.5
0.106	0.101	0.111	R00842	sn-Glycerol-3-phosphate:NAD+ 2-oxidoreductase	sn-Glycerol 3-phosphate + NAD+ <=> Glycerone phosphate + NADH + H+	Glycerophospholipid metabolism	1.1.1.8 1.1.1.94
0.106	0.1	0.112	R00834	D-Sorbitol 6-phosphate:NADP+ 1-oxidoreductase	Sorbitol 6-phosphate + NADP+ <=> D-Glucose 6-phosphate + NADPH + H+		1.1.1.200
0.1055	0.104	0.107	R00846	sn-Glycerol-3-phosphate:oxygen 2-oxidoreductase	sn-Glycerol 3-phosphate + Oxygen <=> Glycerone phosphate + H2O2	Glycerophospholipid metabolism	1.1.3.21
0.105	0.152	0.058	R01517	GTP:3-phospho-D-glycerate 1-phosphotransferase	GTP + 3-Phospho-D-glycerate <=> GDP + 3-Phospho-D-glyceroyl phosphate		2.7.2.10
0.104	0.198	0.01	R00733	L-arogenate:NAD+ oxidoreductase	L-Arogenate + NADP+ <=> L-Tyrosine + CO2 + NADPH	Phenylalanine, tyrosine and tryptophan biosynthesis	1.3.1.43 1.3.1.78 1.3.1.79
0.104	0.061	0.147	R00959	alpha-D-Glucose 1-phosphate 1,6-phosphomutase	D-Glucose 1-phosphate <=> alpha-D-Glucose 6-phosphate	Glycolysis / Gluconeogenesis,Galactose metabolism,Starch and sucrose metabolism,Streptomycin biosynthesis	5.4.2.2 5.4.2.5
0.1035	0.162	0.045	R07159	D-glyceraldehyde-3-phosphate:ferredoxin oxidoreductase	(2R)-2-Hydroxy-3-(phosphonooxy)-propanal + H2O + 2 Oxidized ferredoxin <=> 3-Phospho-D-glycerate + 2 H+ + 2 Reduced ferredoxin		1.2.7.6
0.1025	0.156	0.049	R00373	Glycine:oxaloacetate aminotransferase	Glycine + Oxaloacetate <=> Glyoxylate + L-Aspartate		2.6.1.35
0.1025	0.059	0.146	R00878	alpha-D-Glucose ketol-isomerase	alpha-D-Glucose <=> D-Fructose	Fructose and mannose metabolism	5.3.1.5
0.102	0.204	0	R00999	O-Succinyl-L-homoserine succinate-lyase (adding cysteine)	O-Succinyl-L-homoserine + H2O <=> 2-Oxobutanoate + Succinate + NH3	Methionine metabolism	2.5.1.48
0.101	0.197	0.005	EC142	Isocitrate lyase	[c]icit --> glx + succ	Anaplerotic reactions	EC-4.1.3.1
0.1005	0.201	0	R04326		5\'-Phosphoribosylglycinamide + 5,10-Methenyltetrahydrofolate + H2O <=> 5\'-Phosphoribosyl-N-formylglycinamide + Tetrahydrofolate	One carbon pool by folate	2.1.2.2
0.1	0.036	0.164	R00210	Pyruvate:NADP+ 2-oxidoreductase (CoA-acetylating)	Pyruvate + CoA + NADP+ <=> Acetyl-CoA + CO2 + NADPH	Glycolysis / Gluconeogenesis,Alanine and aspartate metabolism,Pyruvate metabolism	1.2.1.51 1.2.4.1 1.8.1.4 2.3.1.12
0.0995	0.199	0	R04336		L-2-Amino-6-oxoheptanedioate <=> 2,3,4,5-Tetrahydrodipicolinate + H2O	Lysine biosynthesis
0.0995	0.199	0	R02755	meso-2,6-diaminoheptanedioate:NADP+ oxidoreductase (deaminating)	meso-2,6-Diaminoheptanedioate + NADP+ + H2O <=> L-2-Amino-6-oxoheptanedioate + NH3 + NADPH + H+	Lysine biosynthesis	1.4.1.16
0.0995	0.04	0.159	R00211	Glyoxylate:oxygen oxidoreductase	Pyruvate + CoA + Oxygen <=> H2O2 + Acetyl-CoA + CO2	Pyruvate metabolism	1.2.3.6
0.099	0.1	0.098	R02415	Shikimate:pyrroloquinoline-quinone 5-oxidoreductase	Shikimate + PQQ <=> 3-Dehydroshikimate + PQQH2	Phenylalanine, tyrosine and tryptophan biosynthesis	1.1.99.25
0.099	0.042	0.156	R01641	Sedoheptulose-7-phosphate:D-glyceraldehyde-3-phosphate glycolaldehyde transferase	D-Sedoheptulose 7-phosphate + (2R)-2-Hydroxy-3-(phosphonooxy)-propanal <=> D-Ribose 5-phosphate + D-Xylulose 5-phosphate	Pentose phosphate pathway,Carbon fixation	2.2.1.1
0.099	0.01	0.188	EC585	pyrimidine-nucleoside phosphorylase (uracil)	[c]pi + uri <==> r1p + ura	Nucleotide Salvage Pathways	EC-2.4.2.2
0.0985	0.018	0.179	R01128	5\'-Inosinate phosphoribohydrolase	IMP + H2O <=> Hypoxanthine + D-Ribose 5-phosphate	Purine metabolism	3.2.2.12
0.098	0.191	0.005	R01287	O-Acetyl-L-homoserine acetate-lyase (adding methanethiol)	O-Acetyl-L-homoserine + Hydrogen sulfide <=> L-Homocysteine + Acetate	Methionine metabolism	2.5.1.49
0.098	0.191	0.005	EC008	aspartate transaminase	[c]akg + asp-L <==> glu-L + oaa	Alanine and aspartate metabolism	EC-2.6.1.1
0.096	0.057	0.135	R01526	ATP:D-ribulose 5-phosphotransferase	ATP + D-Ribulose <=> ADP + D-Ribulose 5-phosphate	Pentose and glucuronate interconversions	2.7.1.16 2.7.1.47
0.0955	0.19	0.001	R02282	N2-Acetyl-L-ornithine:L-glutamate N-acetyltransferase	N-Acetylornithine + L-Glutamate <=> L-Ornithine + N-Acetyl-L-glutamate	Urea cycle and metabolism of amino groups	2.3.1.35
0.0955	0.19	0.001	R00858	hydrogen-sulfide:NADP+ oxidoreductase	Hydrogen sulfide + 3 NADP+ + 3 H2O <=> Sulfite + 3 NADPH + 3 H+	Sulfur metabolism	1.8.1.2
0.0955	0.048	0.143	R00317	Acetyl phosphate phosphohydrolase	Acetyl phosphate + H2O <=> Acetate + Orthophosphate	Pyruvate metabolism	3.6.1.7
0.095	0.182	0.008	EC453	glyceraldehyde-3-phosphate dehydrogenase	[c]g3p + nad + pi <==> 13dpg + h + nadh	Glycolysis/Gluconeogenesis	EC-1.2.1.12
0.095	0.172	0.018	R01218	5,10-methylenetetrahydrofolate:NAD+ oxidoreductase	5,10-Methylenetetrahydrofolate + NAD+ <=> 5,10-Methenyltetrahydrofolate + NADH + H+	One carbon pool by folate	1.5.1.15
0.0945	0.098	0.091	R01010	Glycerone phosphate phosphohydrolase (alkaline optimum)	Glycerone phosphate + H2O <=> Glycerone + Orthophosphate		3.1.3.1
0.094	0.114	0.074	EC279	2-Oxogluterate dehydrogenase	[c]akg + coa + nad --> co2 + nadh + succoa	Citrate Cycle (TCA)	EC-Undetermined
0.0935	0.186	0.001	R02199	L-Isoleucine:2-oxoglutarate aminotransferase	L-Isoleucine + 2-Oxoglutarate <=> (S)-3-Methyl-2-oxopentanoic acid + L-Glutamate	Valine, leucine and isoleucine biosynthesis	2.6.1.42
0.0915	0.101	0.082	EC541	dCTP deaminase	[c]dctp + h + h2o --> dutp + nh4	Nucleotide Salvage Pathways	EC-3.5.4.13
0.091	0.181	0.001	EC926	valine transaminase	[c]akg + val-L <==> 3mob + glu-L	Valine, leucine, and isoleucine metabolism	EC-2.6.1.42
0.0905	0.153	0.028	R05717	AMP,sulfite:oxidized-glutathione oxidoreductase (adenosine-5\'-phosphosulfate-forming)	AMP + Sulfite + Oxidized glutathione <=> Adenylylsulfate + 2 Glutathione		1.8.4.9
0.0905	0.052	0.129	R02599	CTP:N-acylneuraminate cytidylyltransferase	CTP + N-Acylneuraminate <=> Pyrophosphate + CMP-N-acylneuraminate		2.7.7.43
0.0905	0.052	0.129	R02598	CMP-N-acylneuraminate N-acylneuraminohydrolase	CMP-N-acylneuraminate + H2O <=> CMP + N-Acylneuraminate		3.1.4.40
0.0895	0.179	0	R01216	2-Hydroxy-2-isopropylbutanedioate formaldehyde-lyase	2-Dehydropantoate <=> 3-Methyl-2-oxobutanoic acid + Formaldehyde		4.1.2.12
0.0895	0.063	0.116	R05804	ADP:D-glucose 6-phosphotransferase	ADP + D-Glucose <=> AMP + D-Glucose 6-phosphate		2.7.1.147
0.0895	0.012	0.167	R01571	ATP:thymidine 5\'-phosphotransferase	AMP + Thymidine <=> Adenosine + dTMP		2.7.1.114
0.089	0.178	0	EC011	alanine racemase (irreversible)	[c]ala-L --> ala-D	Alanine and aspartate metabolism	EC-5.1.1.1
0.0875	0.173	0.002	R00861	Hydrogen-sulfide:(acceptor) oxidoreductase	Hydrogen sulfide + Acceptor + 3 H2O <=> Sulfite + Reduced acceptor	Sulfur metabolism	1.8.99.1
0.0875	0.151	0.024	R00688	L-phenylalanine:NAD+ oxidoreductase (deaminating)	L-Phenylalanine + H2O + NAD+ <=> Phenylpyruvate + NH3 + NADH + H+	Phenylalanine metabolism,Phenylalanine, tyrosine and tryptophan biosynthesis	1.4.1.20
0.087	0.047	0.127	R01196		Reduced ferredoxin + Acetyl-CoA + CO2 <=> Oxidized ferredoxin + Pyruvate + CoA	Pyruvate metabolism,Butanoate metabolism,Reductive carboxylate cycle (CO2 fixation)	1.2.7.1
0.0865	0.173	0	EC426	cysteine synthase	[c]acser + h2s --> ac + cys-L + h	Cysteine Metabolism	EC-4.2.99.8
0.0855	0.159	0.012	R01726		Nicotinate + CO2 <=> Pyridine-2,3-dicarboxylate	Alkaloid biosynthesis II
0.0855	0.142	0.029	R07276	L-arogenate:2-oxoglutarate aminotransferase	L-Arogenate + 2-Oxoglutarate <=> Prephenate + L-Glutamate		2.6.1.79
0.085	0.142	0.028	R01731	L-Aspartate:2-oxoglutarate aminotransferase	Oxaloacetate + L-Arogenate <=> L-Aspartate + Prephenate	Phenylalanine, tyrosine and tryptophan biosynthesis	2.6.1.57 2.6.1.78
0.0845	0.141	0.028	R07407	L-aspartate:NADP+ oxidoreductase (deaminating)	L-Aspartate + NADP+ <=> Iminoaspartate + NADPH + H+	Nicotinate and nicotinamide metabolism	1.4.1.21
0.0845	0.132	0.037	R01063	D-Glyceraldehyde-3-phosphate:NADP+ oxidoreductase(phosphorylating)	(2R)-2-Hydroxy-3-(phosphonooxy)-propanal + Orthophosphate + NADP+ <=> 3-Phospho-D-glyceroyl phosphate + NADPH + H+	Glycolysis / Gluconeogenesis,Carbon fixation	1.2.1.12 1.2.1.13 1.2.1.59
0.0845	0.068	0.101	R02236	Dihydrofolate:NADP+ oxidoreductase	Dihydrofolate + NADP+ <=> Folate + NADPH + H+	One carbon pool by folate,Folate biosynthesis	1.5.1.3
0.0835	0.117	0.05	R00604	Formaldehyde:NAD+ oxidoreductase	Formaldehyde + NAD+ + H2O <=> Formate + NADH + H+	Urea cycle and metabolism of amino groups,Methane metabolism	1.2.1.46
0.0835	0.079	0.088	R01139	dATP:D-hexose 6-phosphotransferase	dATP + D-Glucose <=> dADP + D-Glucose 6-phosphate		2.7.1.1
0.0835	0.034	0.133	R02405	Itaconate:CoA ligase (IDP-forming)	GTP + Itaconate + CoA <=> GDP + Orthophosphate + Itaconyl-CoA		6.2.1.4
0.083	0.081	0.085	R00850	sn-Glycerol-3-phosphate:D-glucose 6-phosphotransferase	sn-Glycerol 3-phosphate + D-Glucose <=> Glycerol + D-Glucose 6-phosphate		2.7.1.142
0.083	0.064	0.102	R00514	CDP diphosphohydrolase	CDP + H2O <=> CMP + Orthophosphate	Pyrimidine metabolism	3.6.1.5
0.0825	0.165	0	EC423	serine O-acetyltransferase	[c]accoa + ser-L <==> acser + coa	Cysteine Metabolism	EC-2.3.1.30
0.0825	0.064	0.101	R01140	dATP:D-hexose 6-phosphotransferase	dATP + D-Fructose <=> dADP + D-Fructose 6-phosphate		2.7.1.1
0.0825	0.056	0.109	R01577	D-Arabinose ketol-isomerase	D-Arabinose <=> D-Ribulose		5.3.1.3
0.081	0.076	0.086	R00727	Succinate:CoA ligase (GDP-forming)	ITP + Succinate + CoA <=> IDP + Orthophosphate + Succinyl-CoA	Citrate cycle (TCA cycle)	6.2.1.4
0.0805	0.161	0	R01283	L-Homocysteine hydrogen-sulfide-lyase (deaminating)	L-Homocysteine + H2O <=> Hydrogen sulfide + NH3 + 2-Oxobutanoate	Nitrogen metabolism,Sulfur metabolism	4.4.1.2
0.0805	0.144	0.017	EC648	2-dehydro-3-deoxy-phosphogluconate aldolase	[c]2ddg6p --> g3p + pyr	Pentose Phosphate Cycle	EC-4.1.2.14
0.0805	0.135	0.026	R00907	L-Alanine:3-oxopropanoate aminotransferase	L-Alanine + 3-Oxopropanoate <=> Pyruvate + beta-Alanine	Alanine and aspartate metabolism,beta-Alanine metabolism,Propanoate metabolism	2.6.1.18
0.0805	0.064	0.097	R00940	5,6,7,8-Tetrahydrofolate:NADP+ oxidoreductase	Tetrahydrofolate + NADP+ <=> Folate + NADPH	Folate biosynthesis	1.5.1.3
0.08	0.16	0	R01434	L-Valine:NAD+ oxidoreductase(deaminating)	L-Valine + H2O + NAD+ <=> 3-Methyl-2-oxobutanoic acid + NH3 + NADH	Valine, leucine and isoleucine biosynthesis	1.4.1.9
0.08	0.032	0.128	R01117	CTP:N-acylneuraminate cytidylyltransferase	CTP + N-Acetylneuraminate <=> Pyrophosphate + CMP-N-acetylneuraminate	Aminosugars metabolism	2.7.7.43
0.0795	0.135	0.024	EC054	glycerol-3-phosphate dehydrogenase (NADP)	[c]glyc3p + nadp <==> dhap + h + nadph	Alternate Carbon Metabolism	EC-1.1.1.94
0.0795	0.119	0.04	EC709	phosphotransacetylase	[c]accoa + pi <==> actp + coa	Pyruvate metabolism	EC-2.3.1.8
0.0795	0.069	0.09	R00937	5,6,7,8-Tetrahydrofolate:NAD+ oxidoreductase	Tetrahydrofolate + NAD+ <=> Folate + NADH	Folate biosynthesis	1.5.1.3
0.0795	0.067	0.092	R02235	Dihydrofolate:NAD+ oxidoreductase	Dihydrofolate + NAD+ <=> Folate + NADH + H+	Folate biosynthesis	1.5.1.3
0.0785	0.157	0	EC009	Valine-pyruvate aminotransferase	[c]3mob + ala-L --> pyr + val-L	Alanine and aspartate metabolism	EC-2.6.1.66
0.0785	0.146	0.011	R00014	2-(alpha-Hydroxyethyl)thiamine diphosphate pyruvate-lyase (carboxylating)	2-(alpha-Hydroxyethyl)thiamine diphosphate + CO2 <=> Thiamin diphosphate + Pyruvate	Glycolysis / Gluconeogenesis,Valine, leucine and isoleucine biosynthesis,Butanoate metabolism	1.2.4.1 2.2.1.6 4.1.1.1
0.0775	0.145	0.01	R00134	Formate:NADP+ oxidoreductase	Formate + NADP+ <=> CO2 + NADPH	Methane metabolism	1.2.1.43
0.0775	0.106	0.049	R00224	Pyruvate carboxy-lyase	Pyruvate <=> Acetaldehyde + CO2		4.1.1.1
0.0775	0.095	0.06	R01713	Pyridoxamine:oxaloacetate aminotransferase	Pyridoxamine + Oxaloacetate <=> Pyridoxal + L-Aspartate	Vitamin B6 metabolism	2.6.1.31
0.077	0.147	0.007	R01869	(S)-Dihydroorotate:(acceptor) oxidoreductase; (S)-Dihydroorotate:NAD+ oxidoreductase	(S)-Dihydroorotate + NAD+ <=> Orotate + H+ + NADH	Pyrimidine metabolism	1.3.1.14 1.3.99.11
0.077	0.13	0.024	R00692	L-Phenylalanine(L-histidine):pyruvate aminotransferase	L-Phenylalanine + Pyruvate <=> Phenylpyruvate + L-Alanine		2.6.1.58
0.077	0.061	0.093	R02568	D-Fructose 1-phosphate D-glyceraldehyde-3-phosphate-lyase	D-Fructose 1-phosphate <=> Glycerone phosphate + D-Glyceraldehyde	Fructose and mannose metabolism	4.1.2.13
0.0765	0.146	0.007	R01866	(S)-dihydroorotate:NADP+ oxidoreductase	(S)-Dihydroorotate + NADP+ <=> Orotate + NADPH + H+		1.3.1.15
0.0765	0.127	0.026	R00908	3-Aminopropanoate:2-oxoglutarate aminotransferase	beta-Alanine + 2-Oxoglutarate <=> 3-Oxopropanoate + L-Glutamate	Alanine and aspartate metabolism,beta-Alanine metabolism,Propanoate metabolism	2.6.1.19 2.6.1.55
0.0765	0.068	0.085	R01724	Nicotinate D-ribonucleotide:pyrophosphate phosphoribosyltransferase	Nicotinate D-ribonucleotide + Pyrophosphate <=> Nicotinate + 5-Phospho-alpha-D-ribose 1-diphosphate	Nicotinate and nicotinamide metabolism	2.4.2.11
0.076	0.105	0.047	R01343	L-Ornithine:2-oxo-acid aminotransferase	L-Ornithine + 2-Oxo acid <=> L-Glutamate 5-semialdehyde + L-Amino acid		2.6.1.13
0.076	0.028	0.124	EC549	xanthine phosphoribosyltransferase	[c]prpp + xan --> ppi + xmp	Nucleotide Salvage Pathways	EC-2.4.2.22
0.0755	0.134	0.017	EC462	phosphoenolpyruvate synthase	[c]atp + h2o + pyr --> amp + (2) h + pep + pi	Glycolysis/Gluconeogenesis	EC-2.7.9.2
0.0755	0.058	0.093	R00021	L-Glutamate:ferredoxin oxidoreductase (transaminating)	2 L-Glutamate + 2 Oxidized ferredoxin <=> L-Glutamine + 2-Oxoglutarate + 2 Reduced ferredoxin	Nitrogen metabolism	1.4.7.1
0.075	0.15	0	EC002	L-alanine transaminase	[c]akg + ala-L <==> glu-L + pyr	Alanine and aspartate metabolism	EC-2.6.1.2
0.0745	0.068	0.081	R03237	CTP:D-Tagatose 6-phosphate 1-phosphotransferase	CTP + D-Tagatose 6-phosphate <=> CDP + D-Tagatose 1,6-bisphosphate	Galactose metabolism	2.7.1.11
0.074	0.145	0.003	EC908	phenylalanine transaminase	[c]akg + phe-L <==> glu-L + phpyr	Tyrosine, Tryptophan, and Phenylalanine Metabolism	EC-2.6.1.58
0.074	0.12	0.028	EC449	enolase	[c]2pg <==> h2o + pep	Glycolysis/Gluconeogenesis	EC-4.2.1.11
0.0735	0.138	0.009	EC368	L-aspartate oxidase	[c]asp-L + fum --> iasp + succ	Cofactor and Prosthetic Group Biosynthesis
0.0735	0.002	0.145	EC659	GMP reductase	[c]gmp + (2) h + nadph --> imp + nadp + nh4	Purine and Pyrimidine Biosynthesis	EC-1.6.6.8
0.073	0.146	0	R01795	L-Phenylalanine,tetrahydrobiopterin:oxygen oxidoreductase (4-hydroxylating)	Tetrahydrobiopterin + L-Phenylalanine + Oxygen <=> Dihydrobiopterin + L-Tyrosine + H2O	Phenylalanine, tyrosine and tryptophan biosynthesis	1.14.16.1
0.0725	0.061	0.084	R00337	GDPglucose glucohydrolase	GDP-glucose + H2O <=> GDP + D-Glucose		3.2.1.42
0.0725	0.06	0.085	R01233	GDPglucose sugarphosphohydrolase	GDP-glucose + H2O <=> GMP + D-Glucose 1-phosphate	Starch and sucrose metabolism	3.6.1.21
0.072	0.063	0.081	R01070	beta-D-Fructose 1,6-bisphosphate D-glyceraldehyde-3-phosphate-lyase	beta-D-Fructose 1,6-bisphosphate <=> Glycerone phosphate + (2R)-2-Hydroxy-3-(phosphonooxy)-propanal	Glycolysis / Gluconeogenesis,Pentose phosphate pathway,Fructose and mannose metabolism,Carbon fixation	4.1.2.13
0.0715	0.028	0.115	R01081	D-Ribose ketol-isomerase	D-Ribose <=> D-Ribulose		5.3.1.20
0.071	0.09	0.052	EC205	Ethanolamine ammonia-lyase	[c]etha --> acald + nh4	Cell Envelope Biosynthesis	EC-4.3.1.7
0.071	0.076	0.066	R03238	UTP:D-Tagatose 6-phosphate 1-phosphotransferase	UTP + D-Tagatose 6-phosphate <=> UDP + D-Tagatose 1,6-bisphosphate	Galactose metabolism	2.7.1.11
0.0705	0.136	0.005	R00859	Hydrogen-sulfide:ferredoxin oxidoreductase	Hydrogen sulfide + 3 Oxidized ferredoxin + 3 H2O <=> Sulfite + 3 Reduced ferredoxin	Sulfur metabolism	1.8.7.1
0.07	0.062	0.078	R01848	ITP:Sedoheptulose 7-phosphate 1-phosphotransferase	ITP + Sedoheptulose 7-phosphate <=> IDP + Sedoheptulose 1,7-bisphosphate		2.7.1.11
0.07	0.033	0.107	R00760	ATP:D-fructose 6-phosphotransferase	ATP + D-Fructose <=> ADP + D-Fructose 6-phosphate		2.7.1.1 2.7.1.4
0.0695	0	0.139	EC295	nicotinamide-nucleotide amidase	[c]h2o + nmn --> nh4 + nicrnt	Cofactor and Prosthetic Group Biosynthesis	EC-3.5.1.42
0.0685	0.035	0.102	R00876	ITP:D-hexose 6-phosphotransferase	ITP + D-Fructose <=> IDP + D-Fructose 6-phosphate		2.7.1.1
0.068	0.081	0.055	R00372	Glycine:2-oxoglutarate aminotransferase	Glycine + 2-Oxoglutarate <=> Glyoxylate + L-Glutamate	Glycine, serine and threonine metabolism	2.6.1.4
0.0675	0.134	0.001	R00669	N2-Acetyl-L-ornithine amidohydrolase	N-Acetylornithine + H2O <=> Acetate + L-Ornithine	Urea cycle and metabolism of amino groups	3.5.1.14 3.5.1.16
0.0675	0.133	0.002	R01212	L-valine:NADP+ oxidoreductase (deaminating)	L-Valine + NADP+ + H2O <=> 3-Methyl-2-oxobutanoic acid + NH3 + NADPH + H+		1.4.1.8
0.0675	0.061	0.074	R00770	ITP:D-fructose-6-phosphate 1-phosphotransferase	ITP + D-Fructose 6-phosphate <=> IDP + D-Fructose 1,6-bisphosphate		2.7.1.11
0.067	0.089	0.045	R00711	Acetaldehyde:NADP+ oxidoreductase	Acetaldehyde + NADP+ + H2O <=> Acetate + NADPH + H+	Glycolysis / Gluconeogenesis,Pyruvate metabolism	1.2.1.3 1.2.1.5
0.0665	0.127	0.006	EC369	L-aspartate oxidase	[c]asp-L + o2 --> h2o2 + iasp	Cofactor and Prosthetic Group Biosynthesis
0.0665	0.03	0.103	R01667	dCDP nucleotidohydrolase	dCDP + H2O <=> dCMP + Orthophosphate	Pyrimidine metabolism	3.6.1.12
0.066	0.077	0.055	R01710	Pyridoxamine:oxygen oxidoreductase (deaminating)	Pyridoxamine + H2O + Oxygen <=> Pyridoxal + NH3 + H2O2	Vitamin B6 metabolism	1.4.3.5
0.066	0.006	0.126	EC524	adenosine kinase	[c]adn + atp --> adp + amp + h	Nucleotide Salvage Pathways	EC-2.7.1.20
0.0655	0.076	0.055	R00686	L-Phenylalanine racemase (ATP-hydrolysing)	ATP + L-Phenylalanine + H2O <=> AMP + Pyrophosphate + D-Phenylalanine	Phenylalanine metabolism	5.1.1.11
0.0645	0.075	0.054	R01582	D-Phenylalanine:2-oxoglutarate aminotransferase	D-Phenylalanine + 2-Oxoglutarate <=> Phenylpyruvate + D-Glutamate	Phenylalanine metabolism	2.6.1.21
0.0645	0.068	0.061	R01195	Ferredoxin:NADP+ oxidoreductase	Reduced ferredoxin + NADP+ <=> Oxidized ferredoxin + NADPH + H+		1.18.1.2
0.0645	0.066	0.063	R07227	acetyl-phosphate methylamine:thioredoxin disulfide oxidoreductase(N-methylglycine-forming)	Acetyl phosphate + Methylamine + Oxidized thioredoxin <=> Sarcosine + Orthophosphate + Thioredoxin		1.21.4.3
0.064	0.128	0	EC676	dihydoorotic acid dehydrogenase (quinone8)	[c]dhor-S + q8 --> orot + q8h2	Purine and Pyrimidine Biosynthesis	EC-1.3.3.1
0.064	0.051	0.077	R01843	ATP:Sedoheptulose 7-phosphate 1-phosphotransferase	ATP + Sedoheptulose 7-phosphate <=> ADP + Sedoheptulose 1,7-bisphosphate		2.7.1.11
0.0635	0.036	0.091	R01579	D-Glutamine amidohydrolase	D-Glutamine + H2O <=> D-Glutamate + NH3	D-Glutamine and D-glutamate metabolism,Nitrogen metabolism	3.5.1.2 3.5.1.35 3.5.1.38
0.0635	0.036	0.091	R00579	L-Glutamine racemase	L-Glutamine <=> D-Glutamine	D-Glutamine and D-glutamate metabolism	5.1.1.9 5.1.1.10
0.063	0.035	0.091	R00243	L-Glutamate:NAD+ oxidoreductase (deaminating)	L-Glutamate + NAD+ + H2O <=> 2-Oxoglutarate + NH3 + NADH + H+	Urea cycle and metabolism of amino groups,Glutamate metabolism,Arginine and proline metabolism,D-Glutamine and D-glutamate metabolism,Nitrogen metabolism	1.4.1.2 1.4.1.3 1.4.1.4
0.0625	0.123	0.002	R03217	O-Acetyl-L-homoserine succinate-lyase (adding cysteine)	O-Acetyl-L-homoserine + L-Cysteine <=> L-Cystathionine + Acetate	Methionine metabolism	2.5.1.49
0.0625	0.116	0.009	R01868	(S)-Dihydroorotate:(acceptor) oxidoreductase	(S)-Dihydroorotate + Acceptor <=> Orotate + Reduced acceptor		1.3.99.11
0.062	0.124	0	R02508		Cystathionine + Succinate <=> O-Succinyl-L-homoserine + L-Cysteine	Sulfur metabolism	2.5.1.48
0.0615	0.092	0.031	R00326	Acetaldehyde:(acceptor) oxidoreductase	Acetaldehyde + Acceptor + H2O <=> Acetate + Reduced acceptor	Pyruvate metabolism	1.2.99.6
0.061	0.121	0.001	EC421	adenylyl-sulfate kinase	[c]aps + atp --> adp + h + paps	Cysteine Metabolism	EC-2.7.1.25
0.0605	0.108	0.013	EC649	6-phosphogluconate dehydratase	[c]6pgc --> 2ddg6p + h2o	Pentose Phosphate Cycle
0.06	0.075	0.045	R00400	L-Alanine:2-oxo-acid aminotransferase	L-Alanine + Oxaloacetate <=> Pyruvate + L-Aspartate	Alanine and aspartate metabolism	2.6.1.12
0.06	0.038	0.082	R02740	alpha-D-Glucose 6-phosphate ketol-isomerase	alpha-D-Glucose 6-phosphate <=> beta-D-Fructose 6-phosphate	Glycolysis / Gluconeogenesis,Pentose phosphate pathway,Starch and sucrose metabolism	5.3.1.9
0.0595	0.116	0.003	EC366	L-aspartate oxidase	[c]asp-L + q8 --> iasp + q8h2	Cofactor and Prosthetic Group Biosynthesis
0.059	0.053	0.065	R05875	Ferredoxin:NAD oxidoreductase	Reduced ferredoxin + NAD+ <=> Oxidized ferredoxin + NADH + H+	Toluene and xylene degradation	1.18.1.3
0.059	0.017	0.101	EC104	ribokinase	[c]atp + rib-D --> adp + h + r5p	Alternate Carbon Metabolism	EC-2.7.1.15
0.0585	0.116	0.001	EC143	malate synthase	[c]accoa + glx + h2o --> coa + h + mal-L	Anaplerotic reactions	EC-4.1.3.2
0.058	0.073	0.043	R01712	Pyridoxamine:pyruvate aminotransferase	Pyridoxamine + Pyruvate <=> Pyridoxal + L-Alanine	Vitamin B6 metabolism	2.6.1.30
0.0575	0.043	0.072	R02073	Pyrophosphate:D-fructose-6-phosphate 1-phosphotransferase	Pyrophosphate + beta-D-Fructose 6-phosphate <=> Orthophosphate + beta-D-Fructose 1,6-bisphosphate	Fructose and mannose metabolism	2.7.1.90
0.0575	0.029	0.086	R00093	L-glutamate:NAD+ oxidoreductase (transaminating)	2 L-Glutamate + NAD+ <=> L-Glutamine + 2-Oxoglutarate + NADH + H+	Glutamate metabolism,Nitrogen metabolism	1.4.1.14
0.0565	0.113	0	EC445	L-serine deaminase	[c]ser-L --> nh4 + pyr	Glycine and Serine Metabolism	EC-Undetermined
0.056	0.058	0.054	R00925	Propanoate:CoA ligase (AMP-forming)	ATP + Propanoate + CoA <=> AMP + Pyrophosphate + Propanoyl-CoA		6.2.1.17
0.0555	0.097	0.014	EC458	phosphoglycerate mutase	[c]2pg <==> 3pg	Glycolysis/Gluconeogenesis	EC-5.4.2.1
0.0555	0.091	0.02	EC525	adenylate kinase	[c]amp + atp <==> (2) adp	Nucleotide Salvage Pathways	EC-2.7.4.3
0.0555	0.045	0.066	R02069	D-Fructose 1,6-bisphosphate phosphohydrolase	D-Fructose 1,6-bisphosphate + H2O <=> D-Fructose 1-phosphate + Orthophosphate		3.1.3.68
0.054	0.108	0	R01290	L-Serine hydro-lyase (adding homocysteine)	L-Serine + L-Homocysteine <=> L-Cystathionine + H2O	Glycine, serine and threonine metabolism,Methionine metabolism	4.2.1.22
0.054	0.102	0.006	R01867	(S)-Dihydroorotate:oxygen oxidoreductase	(S)-Dihydroorotate + Oxygen <=> Orotate + H2O2	Pyrimidine metabolism	1.3.3.1 1.3.99.11
0.054	0.002	0.106	R01677	Guanosine ribohydrolase	Guanosine + H2O <=> Guanine + D-Ribose	Purine metabolism	3.2.2.1 3.2.2.8
0.0535	0.104	0.003	R00584	Pyrophosphate:L-serine O-phosphotransferase	Pyrophosphate + L-Serine <=> Orthophosphate + O-Phospho-L-serine		2.7.1.80
0.0535	0.08	0.027	EC111	sorbitol-6-phosphate dehydrogenase	[c]nad + sbt6p <==> f6p + h + nadh	Alternate Carbon Metabolism	EC-1.1.1.140
0.0535	0.068	0.039	R00365	glycine:NAD+ oxidoreductase (deaminating)	Glycine + H2O + NAD+ <=> Glyoxylate + NH3 + NADH + H+		1.4.1.10
0.0525	0.065	0.04	R01440	D-Xylulose-5-phosphate:formaldehyde glycolaldehydetransferase	D-Xylulose 5-phosphate + Formaldehyde <=> (2R)-2-Hydroxy-3-(phosphonooxy)-propanal + Glycerone	Methane metabolism	2.2.1.3
0.0515	0.098	0.005	EC163	N-acetylornithine deacetylase	[c]acg5sa + h2o --> ac + glu5sa	Arginine and Proline Metabolism
0.0515	0.095	0.008	EC461	phosphoglycerate kinase	[c]3pg + atp <==> 13dpg + adp	Glycolysis/Gluconeogenesis	EC-2.7.2.3
0.0515	0.076	0.027	EC390	nicotinic acid mononucleotide pyrophosphorylase	[c]atp + h2o + nac + prpp --> adp + nicrnt + pi + ppi	Cofactor and Prosthetic Group Biosynthesis
0.0515	0.036	0.067	R01468	ATP:ethanolamine O-phosphotransferase	ATP + Ethanolamine <=> ADP + Ethanolamine phosphate	Glycerophospholipid metabolism	2.7.1.82
0.051	0.06	0.042	R01019		PQQ + Acetaldehyde + H2O <=> PQQH2 + Acetate	Pyruvate metabolism	1.2.99.3
0.0505	0.09	0.011	EC527	adentylate kinase (ITP)	[c]amp + itp <==> adp + idp	Nucleotide Salvage Pathways
0.0505	0.047	0.054	EC191	ornithine transaminase	[c]akg + orn --> glu-L + glu5sa	Arginine and Proline Metabolism	EC-2.6.1.13
0.05	0.069	0.031	EC554	Nucleoside triphosphate pyrophosphorylase (dctp)	[c]dctp + h2o --> dcmp + h + ppi	Nucleotide Salvage Pathways
0.05	0.046	0.054	R01044	Pyrophosphate:glycerol 1-phosphotransferase	Pyrophosphate + Glycerol <=> Orthophosphate + Glycerol 1-phosphate		2.7.1.79
0.05	0.038	0.062	R00841	Glycerol-3-phosphate phosphohydrolase	sn-Glycerol 3-phosphate + H2O <=> Glycerol + Orthophosphate	Glycerolipid metabolism	3.1.3.21
0.049	0.095	0.003	R00718		H+ + 3\'-Phosphoadenylyl sulfate + Reduced acceptor <=> Sulfite + Acceptor + ADP
0.049	0.035	0.063	R03239	ITP:D-Tagatose 6-phosphate 1-phosphotransferase	ITP + D-Tagatose 6-phosphate <=> IDP + D-Tagatose 1,6-bisphosphate	Galactose metabolism	2.7.1.11
0.0485	0.056	0.041	EC044	UDPglucose--hexose-1-phosphate uridylyltransferase	[c]gal1p + udpg <==> g1p + udpgal	Alternate Carbon Metabolism	EC-2.7.7.12
0.0485	0.043	0.054	R04386	Acetyl-CoA:carbon-dioxide ligase (ADP-forming)	Acetyl-CoA + Carboxybiotin-carboxyl-carrier protein <=> Malonyl-CoA + Holo-[carboxylase]	Fatty acid biosynthesis	6.4.1.2
0.0485	0.043	0.054	R04385	Biotin-carboxyl-carrier-protein:carbon-dioxide ligase (ADP-forming)	ATP + Holo-[carboxylase] + HCO3- <=> ADP + Orthophosphate + Carboxybiotin-carboxyl-carrier protein	Fatty acid biosynthesis	6.3.4.14
0.0485	0.03	0.067	R00229	Acetate:CoA ligase (ADP-forming)	ATP + Acetate + CoA <=> ADP + Acetyl-CoA + Orthophosphate	Pyruvate metabolism	6.2.1.13
0.0485	0.028	0.069	R00947	D-Glucose-1-phosphate phosphohydrolase	D-Glucose 1-phosphate + H2O <=> alpha-D-Glucose + Orthophosphate	Glycolysis / Gluconeogenesis	3.1.3.10
0.0485	0.021	0.076	R00250	L-Glutamate:oxygen oxidoreductase (deaminating)	L-Glutamate + Oxygen + H2O <=> 2-Oxoglutarate + NH3 + H2O2		1.4.3.11
0.048	0.083	0.013	EC704	acetate kinase	[c]ac + atp <==> actp + adp	Pyruvate metabolism	EC-2.7.2.1
0.048	0.053	0.043	EC647	6-phosphogluconolactonase	[c]6pgl + h2o --> 6pgc + h	Pentose Phosphate Cycle	EC-3.1.1.31
0.048	0.035	0.061	R02628	Phosphoenolpyruvate:protein-L-histidine N-pros-phosphotransferase	Phosphoenolpyruvate + Protein histidine <=> Pyruvate + Protein N(pi)-phospho-L-histidine		2.7.3.9
0.048	0.03	0.066	R02868	dATP:D-hexose 6-phosphotransferase	dATP + D-Sorbitol <=> dADP + Sorbitol 6-phosphate		2.7.1.1
0.047	0.094	0	R04440	(R)-2,3-Dihydroxy-3-methylbutanoate:NADP+ oxidoreductase (isomerizing)	(R)-2,3-Dihydroxy-3-methylbutanoate + NADP+ <=> 3-Hydroxy-3-methyl-2-oxobutanoic acid + NADPH	Valine, leucine and isoleucine biosynthesis	1.1.1.86
0.047	0.022	0.072	R07364	1,2-dihydroxy-5-(methylthio)pent-1-en-3-one:oxygen oxidoreductase (formate-forming)	1,2-Dihydroxy-5-(methylthio)pent-1-en-3-one + Oxygen <=> 4-Methylthio-2-oxobutanoic acid + Formate	Methionine metabolism	1.13.11.54
0.0465	0.052	0.041	R00502	UTP:alpha-D-hexose-1-phosphate uridylyltransferase	UTP + alpha-D-Galactose 1-phosphate <=> Pyrophosphate + UDP-D-galactose	Galactose metabolism,Nucleotide sugars metabolism	2.7.7.10
0.0465	0.033	0.06	R00316	Acetate:CoA ligase (AMP-forming)	ATP + Acetate <=> Pyrophosphate + Acetyl adenylate	Pyruvate metabolism	6.2.1.1
0.0465	0.033	0.06	R00236	Acetyl adenylate:CoA ligase (AMP-forming)	Acetyl adenylate + CoA <=> AMP + Acetyl-CoA	Pyruvate metabolism	6.2.1.1
0.046	0.036	0.056	R00207	Pyruvate:oxygen 2-oxidoreductase (phosphorylating)	Pyruvate + Orthophosphate + Oxygen <=> Acetyl phosphate + H2O2 + CO2	Pyruvate metabolism	1.2.3.3
0.046	0.02	0.072	R00431	GTP:oxaloacetate carboxy-lyase (transphosphorylating)	GTP + Oxaloacetate <=> GDP + Phosphoenolpyruvate + CO2	Citrate cycle (TCA cycle),Pyruvate metabolism	4.1.1.32
0.0455	0.045	0.046	R00665	L-Citrulline N5-carbamoyldihydrolase	L-Citrulline + H2O <=> L-Ornithine + CO2 + NH3		3.5.1.20
0.0455	0.043	0.048	R00725	ITP:D-hexose 6-phosphotransferase	ITP + D-Glucose <=> IDP + D-Glucose 6-phosphate		2.7.1.1
0.0455	0.005	0.086	R00516	UTP:cytidine 5\'-phosphotransferase	UTP + Cytidine <=> UDP + CMP	Pyrimidine metabolism	2.7.1.48
0.0435	0.081	0.006	R01289	L-Serine hydro-lyase (adding homocysteine)	L-Serine + L-Homocysteine <=> Cystathionine + H2O		4.2.1.22
0.0435	0.017	0.07	R01879	2-Deoxyuridine,2-oxoglutarate:oxygen oxidoreductase (2\'-hydroxylating)	Deoxyuridine + 2-Oxoglutarate + Oxygen <=> Uridine + Succinate + CO2		1.14.11.3
0.0435	0.005	0.082	R00962	ITP:cytidine 5\'-phosphotransferase	ITP + Cytidine <=> IDP + CMP	Pyrimidine metabolism	2.7.1.48
0.043	0.081	0.005	EC284	succinyl-CoA synthetase (ADP-forming)	[c]atp + coa + succ <==> adp + pi + succoa	Citrate Cycle (TCA)	EC-6.2.1.5
0.0425	0.063	0.022	R01580	Pyridoxamine-5\'-phosphate:2-oxoglutarate aminotransferase	Pyridoxamine phosphate + 2-Oxoglutarate <=> Pyridoxal phosphate + D-Glutamate	Vitamin B6 metabolism	2.6.1.54
0.0425	0.032	0.053	R05607	D-sorbitol-6-phosphate:NAD 2-oxidoreductase	Sorbitol 6-phosphate + NAD+ <=> beta-D-Fructose 6-phosphate + NADH + H+	Fructose and mannose metabolism	1.1.1.140
0.042	0.082	0.002	R01900	Isocitrate hydro-lyase	Isocitrate <=> cis-Aconitate + H2O	Citrate cycle (TCA cycle),Glyoxylate and dicarboxylate metabolism,Reductive carboxylate cycle (CO2 fixation)	4.2.1.3
0.042	0.082	0.002	R01325	Citrate hydro-lyase	Citrate <=> cis-Aconitate + H2O	Citrate cycle (TCA cycle),Glyoxylate and dicarboxylate metabolism,Reductive carboxylate cycle (CO2 fixation)	4.2.1.3 4.2.1.4
0.042	0.049	0.035	EC656	glucose 6-phosphate dehydrogenase	[c]g6p + nadp <==> 6pgl + h + nadph	Pentose Phosphate Cycle	EC-1.1.1.49
0.0415	0.001	0.082	R00357	L-Aspartic acid:oxygen oxidoreductase (deaminating)	L-Aspartate + H2O + Oxygen <=> Oxaloacetate + NH3 + H2O2	Alanine and aspartate metabolism	1.4.3.2 1.4.3.16
0.0415	0	0.083	R00513	ATP:cytidine 5\'-phosphotransferase	ATP + Cytidine <=> ADP + CMP	Pyrimidine metabolism	2.7.1.48
0.0405	0.028	0.053	R00928	Acetyl-CoA:propanoate CoA-transferase	Acetyl-CoA + Propanoate <=> Acetate + Propanoyl-CoA	Pyruvate metabolism,Propanoate metabolism	2.8.3.1
0.0405	0.019	0.062	EC543	deoxyuridine phosphorylase	[c]duri + pi <==> 2dr1p + ura	Nucleotide Salvage Pathways
0.04	0.009	0.071	R01052	ADP:D-ribose-5-phosphate adenylyltransferase	ADP + D-Ribose 5-phosphate <=> Orthophosphate + ADP-ribose		2.7.7.35
0.0395	0.047	0.032	R05862	sarcosine:oxygen oxidoreductase (deaminating)	Sarcosine + H2O + Oxygen <=> Glyoxylate + Methylamine + H2O2		1.4.3.19
0.0395	0.027	0.052	R00303	D-Glucose-6-phosphate phosphohydrolase	D-Glucose 6-phosphate + H2O <=> D-Glucose + Orthophosphate		3.1.3.9 3.1.3.58
0.0395	0.023	0.056	R02407	Succinyl-CoA:citramalate CoA-transferase	Succinyl-CoA + Itaconate <=> Succinate + Itaconyl-CoA	C5-Branched dibasic acid metabolism	2.8.3.7
0.0395	0.021	0.058	R02738	Protein-N(pai)-phosphohistidine:sugar N(pai)-phosphotransferase	Protein N(pi)-phospho-L-histidine + D-Glucose <=> Protein histidine + alpha-D-Glucose 6-phosphate	Glycolysis / Gluconeogenesis	2.7.1.69
0.0395	0.017	0.062	R07395	5-(Methylthio)-2,3-dioxopentyl-phosphate phosphohydrolase (isomerizing)	2,3-Diketo-5-methylthiopentyl-1-phosphate + H2O <=> 1,2-Dihydroxy-5-(methylthio)pent-1-en-3-one + Orthophosphate		3.1.3.77
0.0395	0	0.079	EC389	nicotinamidase	[c]h2o + ncam --> nac + nh4	Cofactor and Prosthetic Group Biosynthesis	EC-3.5.1.19
0.039	0.078	0	EC516	methylglyoxal synthase	[c]dhap --> mthgxl + pi	Methylglyoxal Metabolism	EC-4.2.3.3
0.0385	0.024	0.053	R00875	D-Glucitol:NAD+ 2-oxidoreductase	D-Sorbitol + NAD+ <=> D-Fructose + NADH + H+	Fructose and mannose metabolism	1.1.1.14 1.1.1.15
0.0385	0.023	0.054	R01787	alpha-D-Glucose:NADP+ 1-oxidoreductase	D-Sorbitol + NADP+ <=> alpha-D-Glucose + NADPH + H+	Fructose and mannose metabolism	1.1.1.21
0.0385	0.019	0.058	EC579	deoxyuridine kinase (ATP:Deoxyuridine)	[c]atp + duri --> adp + dump + h	Nucleotide Salvage Pathways
0.038	0.076	0	R04673	(S)-2-Aceto-2-hydroxybutanoate pyruvate-lyase (carboxylating)	2-Oxobutanoate + 2-(alpha-Hydroxyethyl)thiamine diphosphate <=> (S)-2-Aceto-2-hydroxybutanoate + Thiamin diphosphate	Valine, leucine and isoleucine biosynthesis	2.2.1.6
0.038	0.076	0	R01794	NADPH:6,7-dihydropteridine oxidoreductase	Dihydrobiopterin + NADPH + H+ <=> Tetrahydrobiopterin + NADP+	Folate biosynthesis	1.5.1.34
0.038	0.076	0	R01515	3-Phospho-D-glyceroyl phosphate phosphohydrolase	3-Phospho-D-glyceroyl phosphate + H2O <=> 3-Phospho-D-glycerate + Orthophosphate	Glycolysis / Gluconeogenesis	3.6.1.7
0.038	0.07	0.006	R01285	Cystathionine L-homocysteine-lyase (deaminating)	Cystathionine + H2O <=> L-Homocysteine + NH3 + Pyruvate	Nitrogen metabolism,Sulfur metabolism	4.4.1.8
0.038	0.034	0.042	R00866	ATP:D-fructose 1-phosphotransferase	ATP + D-Fructose <=> ADP + D-Fructose 1-phosphate	Fructose and mannose metabolism	2.7.1.3
0.038	0.034	0.042	R00722	ATP:nucleoside-diphosphate phosphatransferase	ATP + IDP <=> ADP + ITP	Purine metabolism	2.7.4.6
0.038	0.026	0.05	R02154	L-Glutamate:histamine ligase	ATP + L-Glutamate + 1H-Imidazole-4-ethanamine <=> AMP + N(alpha)-gamma-L-Glutamylhistamine + Pyrophosphate		6.3.2.18
0.038	0.026	0.05	R02153	L-Glutamate:histamine ligase	ATP + L-Glutamate + 1H-Imidazole-4-ethanamine <=> ADP + N(alpha)-gamma-L-Glutamylhistamine + Orthophosphate		6.3.2.18
0.0375	0.027	0.048	R07296	choloyl-CoA hydrolase	Choloyl-CoA + H2O <=> 3alpha,7alpha,12alpha-Trihydroxy-5beta-cholanate + CoA		3.1.2.27
0.0375	0.027	0.048	R02794	Cholate:CoA ligase (AMP-forming)	ATP + 3alpha,7alpha,12alpha-Trihydroxy-5beta-cholanate + CoA <=> AMP + Pyrophosphate + Choloyl-CoA	Bile acid biosynthesis	6.2.1.7
0.037	0.073	0.001	R00354	(3S)-Citryl-CoA oxaloacetate-lyase	(3S)-Citryl-CoA <=> Acetyl-CoA + Oxaloacetate	Citrate cycle (TCA cycle)	4.1.3.34
0.037	0.057	0.017	EC180	glutamate 5-kinase	[c]atp + glu-L --> adp + glu5p	Arginine and Proline Metabolism	EC-2.7.2.11
0.037	0.057	0.017	EC179	glutamate-5-semialdehyde dehydrogenase	[c]glu5p + h + nadph --> glu5sa + nadp + pi	Arginine and Proline Metabolism	EC-1.2.1.41
0.037	0.049	0.025	R00614	Formaldehyde:formaldehyde oxidoreductase	2 Formaldehyde + H2O <=> Formate + Methanol		1.2.99.4
0.037	0.031	0.043	R07315	carbamate hydro-lyase	Cyanate + H2O <=> Carbamate		4.2.1.104
0.037	0.031	0.043	R03546	Cyanate C-N-lyase	Cyanate + H+ + HCO3- <=> CO2 + Carbamate	Nitrogen metabolism	4.2.1.104
0.0365	0.063	0.01	R01344	D-Amino acid:pyruvate aminotransferase	D-Amino acid + Pyruvate <=> 2-Oxo acid + D-Alanine	D-Alanine metabolism	2.6.1.41
0.0365	0.022	0.051	R01965	dATP:D-hexose 6-phosphotransferase	dATP + D-Glucosamine <=> dADP + D-Glucosamine 6-phosphate		2.7.1.1
0.0365	0.02	0.053	R01620	Acetyl-phosphate:L-lysine N6-acetyltransferase	Acetyl phosphate + L-Lysine <=> Orthophosphate + N6-Acetyl-L-lysine	Lysine degradation	2.3.1.32
0.0365	0.01	0.063	R02404	Itaconate:CoA ligase (ADP-forming)	ATP + Itaconate + CoA <=> ADP + Orthophosphate + Itaconyl-CoA	C5-Branched dibasic acid metabolism	6.2.1.5
0.036	0.052	0.02	R01261	L-Alanine:2-oxo-acid aminotransferase	L-Alanine + 2-Oxo acid <=> Pyruvate + L-Amino acid		2.6.1.12
0.036	0.028	0.044	R02625	ATP:protein-L-histidine N(pi)-phosphotransferase	ATP + Protein histidine <=> ADP + Protein N(pi)-phospho-L-histidine		2.7.13.1
0.0355	0.071	0	R05069	(S)-2-Aceto-2-hydroxybutanoate:NADP+ oxidoreductase (isomerizing)	(S)-2-Aceto-2-hydroxybutanoate <=> (R)-3-Hydroxy-3-methyl-2-oxopentanoate	Valine, leucine and isoleucine biosynthesis	1.1.1.86 5.4.99.3
0.0355	0.071	0	R05068	(R)-2,3-Dihydroxy-3-methylpentanoate:NADP+ oxidoreductase (isomerizing)	(R)-2,3-Dihydroxy-3-methylpentanoate + NADP+ <=> (R)-3-Hydroxy-3-methyl-2-oxopentanoate + NADPH + H+	Valine, leucine and isoleucine biosynthesis	1.1.1.86
0.0355	0.071	0	R04672	(S)-2-Acetolactate pyruvate-lyase (carboxylating)	(S)-2-Acetolactate + Thiamin diphosphate <=> 2-(alpha-Hydroxyethyl)thiamine diphosphate + Pyruvate	Valine, leucine and isoleucine biosynthesis	2.2.1.6
0.0355	0.069	0.002	EC588	5'-nucleotidase (dTMP)	[c]dtmp + h2o --> pi + thymd	Nucleotide Salvage Pathways	EC-3.1.3.5
0.0355	0.021	0.05	R02406	Itaconate:CoA ligase (IDP-forming)	ITP + Itaconate + CoA <=> IDP + Orthophosphate + Itaconyl-CoA		6.2.1.4
0.0345	0.026	0.043	R02867	ITP:D-hexose 6-phosphotransferase	ITP + D-Sorbitol <=> IDP + Sorbitol 6-phosphate		2.7.1.1
0.0345	0	0.069	R01768	Xanthine:NAD+ oxidoreductase	Hypoxanthine + NAD+ + H2O <=> Xanthine + NADH	Purine metabolism	1.17.1.4
0.034	0.041	0.027	R00412	Succinate:(acceptor) oxidoreductase	Succinate + Acceptor <=> Fumarate + Reduced acceptor	Citrate cycle (TCA cycle),Benzoate degradation via CoA ligation	1.3.99.1
0.0335	0.023	0.044	R02145	Guanosine aminohydrolase	Guanosine + H2O <=> Xanthosine + NH3		3.5.4.15
0.0335	0.02	0.047	R00867	ATP:D-fructose 6-phosphotransferase	ATP + D-Fructose <=> ADP + beta-D-Fructose 6-phosphate	Fructose and mannose metabolism	2.7.1.1 2.7.1.4
0.0335	0.012	0.055	R02295	Nicotinate D-ribonucleoside:orthophosphate ribosyltransferase	Nicotinate D-ribonucleoside + Orthophosphate <=> Nicotinate + alpha-D-Ribose 1-phosphate	Nicotinate and nicotinamide metabolism	2.4.2.1
0.0335	0.011	0.056	R07396		4-Methylthio-2-oxobutanoic acid + L-Glutamate <=> L-Methionine + 2-Oxoglutarate	Methionine metabolism	2.6.1.5 2.6.1.57
0.033	0.066	0	EC677	dihydroorotic acid (menaquinone-8)	[c]dhor-S + mqn8 --> mql8 + orot	Purine and Pyrimidine Biosynthesis	EC-1.3.3.1
0.033	0.021	0.045	R07298	glycerol-1-phosphate phosphohydrolase	Glycerol 1-phosphate + H2O <=> Glycerol + Orthophosphate		3.1.3.21
0.0325	0.065	0	R03012	L-Histidinol:NAD+ oxidoreductase	L-Histidinol + NAD+ <=> L-Histidinal + NADH + H+	Histidine metabolism	1.1.1.23
0.0325	0.065	0	R01793	NADH:6,7-dihydropteridine oxidoreductase	Dihydrobiopterin + NADH + H+ <=> Tetrahydrobiopterin + NAD+	Folate biosynthesis	1.5.1.34
0.0325	0.065	0	R01163	L-Histidinal:NAD+ oxidoreductase	L-Histidinal + H2O + 2 NAD+ <=> L-Histidine + 2 NADH + H+	Histidine metabolism	1.1.1.23
0.0325	0.065	0	R00397	L-Aspartate 4-carboxy-lyase	L-Aspartate <=> L-Alanine + CO2	Alanine and aspartate metabolism	4.1.1.12
0.0325	0.021	0.044	R02296	Cytidine:orthophosphate alpha-D-ribosyltransferase	Cytidine + Orthophosphate <=> Cytosine + alpha-D-Ribose 1-phosphate	Pyrimidine metabolism	2.4.2.2
0.032	0.061	0.003	EC274	fumarate reductase	[c]fum + mql8 --> mqn8 + succ	Citrate Cycle (TCA)	EC-1.3.99.1
0.032	0.049	0.015	EC568	nucleoside-diphosphate kinase (ATP:dADP)	[c]atp + dadp <==> adp + datp	Nucleotide Salvage Pathways	EC-2.7.4.6
0.032	0.029	0.035	R02071	ATP:D-fructose-1-phosphate 6-phosphotransferase	ATP + D-Fructose 1-phosphate <=> ADP + beta-D-Fructose 1,6-bisphosphate	Fructose and mannose metabolism	2.7.1.56
0.0315	0.035	0.028	EC536	cytidylate kinase (dCMP)	[c]atp + dcmp <==> adp + dcdp	Nucleotide Salvage Pathways	EC-2.7.4.14
0.0315	0.021	0.042	R01964	ITP:D-hexose 6-phosphotransferase	ITP + D-Glucosamine <=> IDP + D-Glucosamine 6-phosphate		2.7.1.1
0.0315	0	0.063	R02096	dTTP:cytidine 5\'-phosphotransferase	dTTP + Cytidine <=> dTDP + CMP	Pyrimidine metabolism	2.7.1.48
0.031	0.062	0	EC427	Tryptophanase (L-cysteine)	[c]cys-L + h2o --> h2s + nh4 + pyr	Cysteine Metabolism	EC-4.1.99.1
0.031	0.028	0.034	EC566	nucleoside-diphosphate kinase (ATP:dUDP)	[c]atp + dudp <==> adp + dutp	Nucleotide Salvage Pathways	EC-2.7.4.6
0.031	0.018	0.044	R02866	Sorbitol-6-phosphate phosphohydrolase	Sorbitol 6-phosphate + H2O <=> D-Sorbitol + Orthophosphate		3.1.3.50
0.0305	0.061	0	R05071	(S)-2-Acetolactate methylmutase	(S)-2-Acetolactate <=> 3-Hydroxy-3-methyl-2-oxobutanoic acid	Valine, leucine and isoleucine biosynthesis	1.1.1.86 5.4.99.3
0.0305	0.048	0.013	EC447	pyruvate dehydrogenase	[c]coa + nad + pyr --> accoa + co2 + nadh	Glycolysis/Gluconeogenesis
0.0305	0.035	0.026	R01039	Glycerol:NADP+ 2-oxidoreductase	Glycerol + NADP+ <=> Glycerone + NADPH + H+	Glycerolipid metabolism	1.1.1.156
0.0305	0.035	0.026	R00743	Acetyl-CoA:malonate CoA-transferase	Acetyl-CoA + Malonate <=> Acetate + Malonyl-CoA	beta-Alanine metabolism,Propanoate metabolism	2.8.3.3
0.03	0.058	0.002	R01393	Hydroxypyruvate carboxy-lyase	Hydroxypyruvate <=> Glycolaldehyde + CO2	Glyoxylate and dicarboxylate metabolism	4.1.1.40
0.03	0.035	0.025	R00369	L-Alanine:glyoxylate aminotransferase	L-Alanine + Glyoxylate <=> Pyruvate + Glycine	Alanine and aspartate metabolism,Glycine, serine and threonine metabolism	2.6.1.44
0.03	0.021	0.039	R01207	N-Acyl-D-glucosamine 2-epimerase	N-Acetyl-D-glucosamine <=> N-Acetyl-D-mannosamine	Aminosugars metabolism	5.1.3.8
0.03	0.015	0.045	R00569	CTP diphosphohydrolase	CTP + H2O <=> CDP + Orthophosphate	Pyrimidine metabolism	3.6.1.5
0.03	0.013	0.047	EC597	5'-nucleotidase (UMP)	[c]h2o + ump --> pi + uri	Nucleotide Salvage Pathways	EC-3.1.3.5
0.0295	0.05	0.009	R06973		3-Oxopropanoate <=> Acetaldehyde + CO2	3-Chloroacrylic acid degradation	4.1.1.-
0.0295	0.026	0.033	R01845	Sedoheptulose 1,7-bisphosphate 1-phosphohydrolase	Sedoheptulose 1,7-bisphosphate + H2O <=> Sedoheptulose 7-phosphate + Orthophosphate	Carbon fixation	3.1.3.11 3.1.3.37
0.0295	0.02	0.039	R01330	dATP:D-hexose 6-phosphotransferase	dATP + D-Mannose <=> dADP + D-Mannose 6-phosphate		2.7.1.1
0.0295	0.02	0.039	R00414	UDP-N-acetyl-D-glucosamine 2-epimerase	UDP-N-acetyl-D-glucosamine + H2O <=> N-Acetyl-D-mannosamine + UDP	Aminosugars metabolism	5.1.3.14
0.029	0.054	0.004	EC459	phosphofructokinase	[c]atp + f6p --> adp + fdp + h	Glycolysis/Gluconeogenesis	EC-2.7.1.11
0.029	0.036	0.022	R01655	5,10-Methenyltetrahydrofolate 5-hydrolase(decyclizing)	5,10-Methenyltetrahydrofolate + H2O <=> 10-Formyltetrahydrofolate + H+	Glyoxylate and dicarboxylate metabolism,One carbon pool by folate	3.5.4.9 6.3.4.3
0.0285	0.045	0.012	R01011	ATP:glycerone phosphotransferase	ATP + Glycerone <=> ADP + Glycerone phosphate	Glycerolipid metabolism	2.7.1.29
0.0285	0.03	0.027	R01257	(S)-Malate:(acceptor) oxidoreductase	(S)-Malate + FAD <=> FADH2 + Oxaloacetate	Pyruvate metabolism	1.1.99.16
0.0285	0.026	0.031	R01510	2,3-Dihydroxybenzoate:L-serine ligase	ATP + 2,3-Dihydroxybenzoate + L-Serine <=> AMP + N-(2,3-Dihydroxybenzoyl)-L-serine + Pyrophosphate		6.3.2.14
0.0285	0.026	0.031	R01509	2,3-Dihydroxybenzoate:L-serine ligase	ATP + 2,3-Dihydroxybenzoate + L-Serine <=> ADP + N-(2,3-Dihydroxybenzoyl)-L-serine + Orthophosphate		6.3.2.14
0.028	0.055	0.001	EC367	L-aspartate oxidase	[c]asp-L + mqn8 --> iasp + mql8	Cofactor and Prosthetic Group Biosynthesis
0.028	0.047	0.009	R00094	NADPH:oxidized-glutathione oxidoreductase	NAD+ + 2 Glutathione <=> Oxidized glutathione + NADH + H+	Glutamate metabolism	1.8.1.7
0.028	0.023	0.033	R01511	D-Glycerate-3-phosphate phosphohydrolase	3-Phospho-D-glycerate + H2O <=> D-Glycerate + Orthophosphate	Glycine, serine and threonine metabolism	3.1.3.38
0.028	0.004	0.052	R02371	dCTP:cytidine 5\'-phosphotransferase	dCTP + Cytidine <=> dCDP + CMP	Pyrimidine metabolism	2.7.1.48
0.028	0.003	0.053	EC529	AMP nucleosidase	[c]amp + h2o --> ade + r5p	Nucleotide Salvage Pathways	EC-3.2.2.4
0.0275	0.043	0.012	R01322	Citrate:CoA ligase (ADP-forming)	ATP + Citrate + CoA <=> ADP + Orthophosphate + (3S)-Citryl-CoA	Citrate cycle (TCA cycle)	6.2.1.18
0.0275	0.035	0.02	R01258	L-amino-aicd:NAD+ oxidoreductase (deaminating)	L-Amino acid + NAD+ + H2O <=> 2-Oxo acid + NH3 + NADH + H+		1.4.1.5
0.0275	0.016	0.039	R00269	2-Oxoglutaramate amidohydrolase	2-Oxoglutaramate + H2O <=> 2-Oxoglutarate + NH3	Glutamate metabolism	3.5.1.3
0.0275	0.013	0.042	R00652	L-Methionine:glyoxylate aminotransferase	L-Methionine + Glyoxylate <=> 4-Methylthio-2-oxobutanoic acid + Glycine		2.6.1.73
0.0275	0.013	0.042	R00454		L-Lysine + Acetyl-CoA <=> N6-Acetyl-L-lysine + CoA	Lysine degradation	2.3.1.-
0.0275	0.001	0.054	R01627	3-Dehydroshikimate hydro-lyase	3-Dehydroshikimate <=> 3,4-Dihydroxybenzoate + H2O	Phenylalanine, tyrosine and tryptophan biosynthesis	4.2.1.10
0.027	0.054	0	R00006	2-Acetolactate pyruvate-lyase (carboxylating)	2-Acetolactate + CO2 <=> 2 Pyruvate	Pantothenate and CoA biosynthesis	2.2.1.6
0.027	0.049	0.005	R00753	(S)-Lactate acetaldehyde-lyase	(S)-Lactate <=> Formate + Acetaldehyde	Pyruvate metabolism	4.1.2.36
0.027	0.04	0.014	R01259	L-Amino-acid:oxygen oxidoreductase (deaminating)	L-Amino acid + H2O + Oxygen <=> 2-Oxo acid + NH3 + H2O2		1.4.3.2
0.027	0.001	0.053	R00967	UTP:uridine 5\'-phosphotransferase	UTP + Uridine <=> UDP + UMP	Pyrimidine metabolism	2.7.1.48
0.0265	0.051	0.002	R01851	Methanethiol:oxygen oxidoreductase	Methanethiol + Oxygen + H2O <=> Hydrogen sulfide + Formaldehyde + H2O2		1.8.3.4
0.0265	0.045	0.008	R00800		Nitrite + H2O <=> Nitrate + 2 H+	Nitrogen metabolism
0.0265	0.029	0.024	R00576	L-Glutamine:pyruvate aminotransferase	L-Glutamine + Pyruvate <=> 2-Oxoglutaramate + L-Alanine	Glutamate metabolism	2.6.1.15
0.0265	0.025	0.028	R00402	succinate:NAD+ oxidoreductase	Succinate + NAD+ <=> Fumarate + NADH + H+		1.3.1.6
0.0265	0.001	0.052	R01548	dATP:cytidine 5\'-phosphotransferase	dATP + Cytidine <=> dADP + CMP	Pyrimidine metabolism	2.7.1.48
0.026	0.052	0	R00997	1-Aminocyclopropane-1-carboxylate endolyase (deaminating)	1-Aminocyclopropane-1-carboxylate + H2O <=> 2-Oxobutanoate + NH3	Propanoate metabolism	3.5.99.7
0.026	0.052	0	R00179	S-Adenosyl-L-methionine methylthioadenosine-lyase	S-Adenosyl-L-methionine <=> 1-Aminocyclopropane-1-carboxylate + 5\'-Methylthioadenosine	Propanoate metabolism	4.4.1.14
0.026	0.02	0.032	R05339		D-arabino-3-Hexulose 6-phosphate <=> D-Fructose 6-phosphate	Pentose and glucuronate interconversions,Methane metabolism	5.-.-.-
0.026	0.02	0.032	R05338	D-arabino-3-Hexulose 6-phosphate formaldehyde-lyase	D-Ribulose 5-phosphate + Formaldehyde <=> D-arabino-3-Hexulose 6-phosphate	Pentose and glucuronate interconversions,Methane metabolism	4.1.2.-
0.026	0.018	0.034	R04780	beta-D-Fructose 1,6-bisphosphate 1-phosphohydrolase	beta-D-Fructose 1,6-bisphosphate + H2O <=> beta-D-Fructose 6-phosphate + Orthophosphate	Glycolysis / Gluconeogenesis,Pentose phosphate pathway,Fructose and mannose metabolism	3.1.3.11
0.0255	0.04	0.011	R01751	(R,R)-Tartrate carboxy-lyase	(R,R)-Tartaric acid <=> D-Glycerate + CO2		4.1.1.73
0.0255	0.01	0.041	R01602	alpha-D-Glucose 1-epimerase	alpha-D-Glucose <=> beta-D-Glucose	Glycolysis / Gluconeogenesis	5.1.3.3
0.0255	0.004	0.047	EC599	purine-nucleoside phosphorylase (Inosine)	[c]ins + pi <==> hxan + r1p	Nucleotide Salvage Pathways	EC-2.4.2.1
0.025	0.045	0.005	R00121		Oxygen + H2O + 2 Sulfur <=> Hydrogen sulfide + Sulfite	Sulfur metabolism	1.13.99.-
0.025	0.037	0.013	R00703	(S)-Lactate:NAD+ oxidoreductase	(S)-Lactate + NAD+ <=> Pyruvate + NADH + H+	Glycolysis / Gluconeogenesis,Pyruvate metabolism	1.1.1.27
0.025	0.028	0.022	R01375	L-Glutamine:phenylpyruvate aminotransferase	L-Glutamine + Phenylpyruvate <=> 2-Oxoglutaramate + L-Phenylalanine		2.6.1.64
0.025	0.023	0.027	EC587	5'-nucleotidase (dUMP)	[c]dump + h2o --> duri + pi	Nucleotide Salvage Pathways	EC-3.1.3.5
0.025	0.022	0.028	R02330	dUTP nucleotidohydrolase	dUTP + H2O <=> dUDP + Orthophosphate	Pyrimidine metabolism	3.6.1.39
0.0245	0.033	0.016	R00120	Glutathione:oxygen oxidoreductase	Oxygen + 2 Glutathione <=> Oxidized glutathione + H2O2	Glutathione metabolism	1.8.3.3 1.8.4.1 1.8.4.4
0.0245	0.029	0.02	R00343	(S)-Malate:NADP+ oxidoreductase	(S)-Malate + NADP+ <=> Oxaloacetate + NADPH + H+	Pyruvate metabolism,Carbon fixation	1.1.1.82
0.0245	0.02	0.029	R01416	Agmatine iminohydrolase	Agmatine + H2O <=> N-Carbamoylputrescine + NH3	Arginine and proline metabolism	3.5.3.12
0.024	0.02	0.028	R04779	ATP:D-fructose-6-phosphate 1-phosphotransferase	ATP + beta-D-Fructose 6-phosphate <=> ADP + beta-D-Fructose 1,6-bisphosphate	Glycolysis / Gluconeogenesis,Pentose phosphate pathway,Fructose and mannose metabolism	2.7.1.11
0.024	0.018	0.03	R03154	Succinyl-CoA:citramalate CoA-transferase	Succinyl-CoA + (S)-2-Methylmalate <=> Succinate + (3S)-Citramalyl-CoA	C5-Branched dibasic acid metabolism	2.8.3.7
0.024	0.014	0.034	R05820	Protein-N(pai)-phosphohistidine:sugar N(pai)-phosphotransferase	Protein N(pi)-phospho-L-histidine + D-Sorbitol <=> Protein histidine + Sorbitol 6-phosphate	Fructose and mannose metabolism	2.7.1.69
0.024	0.013	0.035	EC601	purine-nucleoside phosphorylase (Deoxyguanosine)	[c]dgsn + pi <==> 2dr1p + gua	Nucleotide Salvage Pathways	EC-2.4.2.1
0.024	0.003	0.045	R00970	ITP:uridine 5\'-phosphotransferase	ITP + Uridine <=> IDP + UMP	Pyrimidine metabolism	2.7.1.48
0.0235	0.047	0	EC420	3',5'-bisphosphate nucleotidase	[c]h2o + pap --> amp + pi	Cysteine Metabolism	EC-3.1.3.7
0.0235	0.041	0.006	EC276	fumarase	[c]fum + h2o <==> mal-L	Citrate Cycle (TCA)	EC-4.2.1.2
0.0235	0.02	0.027	R05679	sn-Glycerol-1-phosphate:NAD 2-oxidoreductase	Glycerol 1-phosphate + NAD+ <=> Glycerone phosphate + NADH + H+		1.1.1.261
0.0235	0.01	0.037	R02865	ATP:D-hexose 6-phosphotransferase	ATP + D-Sorbitol <=> ADP + Sorbitol 6-phosphate		2.7.1.1
0.0235	0.007	0.04	R01885		ADP-ribose + H2O <=> alpha-D-Ribose 1-phosphate + AMP	Purine metabolism	3.6.1.21
0.0235	0.006	0.041	R01990	4-Guanidinobutanoate amidinohydrolase	4-Guanidinobutanoate + H2O <=> 4-Aminobutanoate + Urea	Arginine and proline metabolism	3.5.3.7
0.0235	0.006	0.041	R01989	L-Arginine:glycine amidinotransferase	L-Arginine + 4-Aminobutanoate <=> L-Ornithine + 4-Guanidinobutanoate	Arginine and proline metabolism	2.1.4.1
0.023	0.009	0.037	R01788	alpha-D-Glucose 6-phosphate phosphohydrolase	alpha-D-Glucose 6-phosphate + H2O <=> alpha-D-Glucose + Orthophosphate	Glycolysis / Gluconeogenesis,Galactose metabolism,Starch and sucrose metabolism	3.1.3.9
0.0225	0.045	0	R01899	Isocitrate:NADP+ oxidoreductase (decarboxylating)	Isocitrate + NADP+ <=> Oxalosuccinate + NADPH + H+	Citrate cycle (TCA cycle)	1.1.1.42
0.0225	0.045	0	R00268	Oxalosuccinate:NADP+ oxidoreductase (decarboxylating)	Oxalosuccinate + NADP+ <=> 2-Oxoglutarate + CO2 + NADPH + H+	Citrate cycle (TCA cycle)	1.1.1.42
0.0225	0.045	0	EC424	phosphoadenylyl-sulfate reductase (thioredoxin)	[c]paps + trdrd --> (2) h + pap + so3 + trdox	Cysteine Metabolism	EC-1.8.4.8
0.0225	0.042	0.003	R00585	L-Serine:pyruvate aminotransferase	L-Serine + Pyruvate <=> Hydroxypyruvate + L-Alanine	Glycine, serine and threonine metabolism	2.6.1.51
0.0225	0.038	0.007	R01340	D-Amino-acid:oxygen oxidoreductase (deaminating)	D-Amino acid + H2O + Oxygen <=> 2-Oxo acid + NH3 + H2O2		1.4.3.3
0.0225	0.032	0.013	R01376	L-Tryptophan:phenylpyruvate aminotransferase	L-Tryptophan + Phenylpyruvate <=> Indolepyruvate + L-Phenylalanine		2.6.1.28
0.0225	0.025	0.02	R05198		Ethanol + PQQ <=> PQQH2 + Acetaldehyde	Glycolysis / Gluconeogenesis	1.1.99.8
0.0225	0.025	0.02	R00605	methanol:NAD+ oxidoreductase	Methanol + NAD+ <=> Formaldehyde + NADH + H+	Methane metabolism	1.1.1.244
0.0225	0.02	0.025	R01045	Glycerol:(acceptor) 1-oxidoreductase	Glycerol + Acceptor <=> Glycerone + Reduced acceptor		1.1.99.22
0.0225	0.015	0.03	EC146	inorganic diphosphatase	[c]h2o + ppi --> h + (2) pi	Anaplerotic reactions	EC-3.6.1.1
0.0225	0.005	0.04	R00775	Guanidinoacetate amidohydrolase	Guanidinoacetate + H2O <=> Glycine + Urea		3.5.3.2
0.0225	0.005	0.04	R00565	L-Arginine:glycine amidinotransferase	L-Arginine + Glycine <=> L-Ornithine + Guanidinoacetate	Urea cycle and metabolism of amino groups,Glycine, serine and threonine metabolism,Arginine and proline metabolism	2.1.4.1
0.022	0.044	0	R03052	2-Acetolactate methylmutase	2-Acetolactate <=> 3-Hydroxy-3-methyl-2-oxobutanoic acid		5.4.99.3
0.022	0.044	0	R00732	L-arogenate:NAD+ oxidoreductase	L-Arogenate + NAD+ <=> L-Tyrosine + CO2 + NADH	Phenylalanine, tyrosine and tryptophan biosynthesis	1.3.1.43 1.3.1.79
0.022	0.027	0.017	R00361	(S)-Malate:(acceptor) oxidoreductase	(S)-Malate + Acceptor <=> Oxaloacetate + Reduced acceptor		1.1.99.16
0.022	0.024	0.02	R05680	sn-Glycerol-1-phosphate:NADP 2-oxidoreductase	Glycerol 1-phosphate + NADP+ <=> Glycerone phosphate + NADPH + H+		1.1.1.261
0.022	0.02	0.024	R02712	4-Methylene-L-glutamine amidohydrolase	4-Methylene-L-glutamine + H2O <=> 4-Methylene-L-glutamate + NH3	C5-Branched dibasic acid metabolism	3.5.1.67
0.022	0.02	0.024	R02711	4-Methylene-L-glutamate:ammonia ligase (AMP-forming)	ATP + 4-Methylene-L-glutamate + NH3 <=> AMP + Pyrophosphate + 4-Methylene-L-glutamine	C5-Branched dibasic acid metabolism	6.3.1.7
0.0215	0.041	0.002	R00651	O-Acetyl-L-homoserine acetate-lyase (adding methanethiol)	O-Acetyl-L-homoserine + Methanethiol <=> L-Methionine + Acetate		2.5.1.49
0.0215	0.037	0.006	EC102	acetate-CoA ligase (ADP-forming)	[c]atp + coa + ppa --> adp + pi + ppcoa	Alternate Carbon Metabolism	EC-6.2.1.13
0.0215	0.03	0.013	EC333	alanine transaminase	[c]ala-L + pydx5p --> pyam5p + pyr	Cofactor and Prosthetic Group Biosynthesis
0.0215	0.018	0.025	R01201	ATP:N-acetyl-D-glucosamine 6-phosphotransferase	ATP + N-Acetyl-D-glucosamine <=> ADP + N-Acetyl-D-glucosamine 6-phosphate	Glutamate metabolism,Aminosugars metabolism	2.7.1.59
0.0215	0.017	0.026	R01752	D-Glyceraldehyde:NAD+ oxidoreductase	D-Glyceraldehyde + NAD+ + H2O <=> D-Glycerate + NADH + H+	Glycerolipid metabolism	1.2.1.3
0.0215	0.012	0.031	EC606	adenine deaminase	[c]ade + h + h2o --> hxan + nh4	Nucleotide Salvage Pathways	EC-3.5.4.2
0.0215	0.009	0.034	EC535	deoxycytidine deaminase	[c]dcyt + h + h2o --> duri + nh4	Nucleotide Salvage Pathways	EC-3.5.4.14
0.0215	0	0.043	R02097	dTTP:uridine 5\'-phosphotransferase	dTTP + Uridine <=> dTDP + UMP	Pyrimidine metabolism	2.7.1.48
0.0215	0	0.043	R00964	ATP:uridine 5\'-phosphotransferase	ATP + Uridine <=> ADP + UMP	Pyrimidine metabolism	2.7.1.48
0.021	0.036	0.006	R00781	Sulfur:oxygen oxidoreductase	Sulfur + Oxygen + H2O <=> Sulfite	Sulfur metabolism	1.13.11.18
0.021	0.014	0.028	R03153	Acetyl-CoA:citramalate CoA-transferase	Acetyl-CoA + (S)-2-Methylmalate <=> Acetate + (3S)-Citramalyl-CoA	C5-Branched dibasic acid metabolism	2.8.3.11 4.1.3.22
0.021	0.013	0.029	R01200	N-Acetyl-D-glucosamine amidohydrolase	N-Acetyl-D-glucosamine + H2O <=> D-Glucosamine + Acetate	Aminosugars metabolism	3.5.1.33
0.0205	0.039	0.002	R01859	Propanoyl-CoA:carbon-dioxide ligase (ADP-forming)	ATP + Propanoyl-CoA + HCO3- <=> ADP + Orthophosphate + (S)-2-Methyl-3-oxopropanoyl-CoA	Valine, leucine and isoleucine degradation,Propanoate metabolism	6.4.1.3
0.0205	0	0.041	R02091	dGTP:cytidine 5\'-phosphotransferase	dGTP + Cytidine <=> dGDP + CMP	Pyrimidine metabolism	2.7.1.48
0.02	0.04	0	R00203	Pyruvaldehyde:NAD+ oxidoreductase; Pyruvaldehyde:NAD+ 2-oxidoreductase	Methylglyoxal + NAD+ + H2O <=> Pyruvate + NADH + H+	Pyruvate metabolism	1.2.1.22 1.2.1.23
0.02	0.037	0.003	EC640	succinate dehyrdogenase	[c]fadh2 + q8 <==> fad + q8h2	Oxidative phosphorylation	EC-Undetermined
0.02	0.036	0.004	EC065	2-dehydro-3-deoxygluconokinase	[c]2ddglcn + atp --> 2ddg6p + adp + h	Alternate Carbon Metabolism	EC-2.7.1.45
0.02	0.034	0.006	EC089	acetaldehyde dehydrogenase (acetylating)	[c]acald + coa + nad --> accoa + h + nadh	Alternate Carbon Metabolism	EC-1.2.1.10
0.02	0.02	0.02	R01516	3-Phospho-D-glycerate 1,2-phosphomutase	2,3-Bisphospho-D-glycerate + H2O <=> 3-Phospho-D-glycerate + Orthophosphate	Glycolysis / Gluconeogenesis	3.1.3.13 5.4.2.4
0.0195	0.037	0.002	R00930	(S)-2-Methyl-3-oxopropanoyl-CoA:pyruvate carboxyltransferase	(S)-2-Methyl-3-oxopropanoyl-CoA + Pyruvate <=> Propanoyl-CoA + Oxaloacetate	Propanoate metabolism	2.1.3.1
0.0195	0.035	0.004	R01538	D-Gluconate hydro-lyase	D-Gluconic acid <=> 2-Dehydro-3-deoxy-D-gluconate + H2O	Pentose phosphate pathway	4.2.1.39
0.0195	0.015	0.024	R06861	D-xylulose-5-phosphate:thiamin diphosphate glycolaldehydetransferase; alpha,beta-dihydroxyethyl-TPP:D-glyceraldehyde-3-phosphate glycolaldehydetransferase	D-Xylulose 5-phosphate + Thiamin diphosphate <=> alpha,beta-Dihydroxyethyl-TPP + (2R)-2-Hydroxy-3-(phosphonooxy)-propanal		2.2.1.1 2.2.1.3
0.0195	0.013	0.026	R01786	ATP:D-glucose 6-phosphotransferase	ATP + alpha-D-Glucose <=> ADP + alpha-D-Glucose 6-phosphate	Glycolysis / Gluconeogenesis,Galactose metabolism,Starch and sucrose metabolism,Streptomycin biosynthesis	2.7.1.1 2.7.1.2
0.0195	0.013	0.026	R01339		2-Oxo acid + L-Glutamate <=> alpha-Amino acid + 2-Oxoglutarate	Nitrogen metabolism
0.0195	0.012	0.027	R03321	beta-D-Glucose 6-phosphate ketol-isomerase	beta-D-Glucose 6-phosphate <=> beta-D-Fructose 6-phosphate	Glycolysis / Gluconeogenesis	5.3.1.9
0.0195	0.012	0.027	R00763	D-Fructose-2,6-bisphosphate 2-phosphohydrolase	beta-D-Fructose 2,6-bisphosphate + H2O <=> D-Fructose 6-phosphate + Orthophosphate		3.1.3.46
0.0195	0.01	0.029	R01789	D-Glucose 6-sulfate sulfohydrolase	D-Glucose 6-sulfate + H2O <=> alpha-D-Glucose + Sulfate	Glycolysis / Gluconeogenesis	3.1.6.3
0.0195	0.009	0.03	R00874	D-Glucose:D-fructose oxidoreductase	D-Fructose + D-Glucose <=> D-Glucono-1,5-lactone + D-Sorbitol		1.1.99.28
0.0195	0.007	0.032	EC600	purine-nucleoside phosphorylase (Deoxyadenosine)	[c]dad-2 + pi <==> 2dr1p + ade	Nucleotide Salvage Pathways	EC-2.4.2.1
0.0195	0.004	0.035	R02294	N-Ribosylnicotinamide:orthophosphate ribosyltransferase	N-Ribosylnicotinamide + Orthophosphate <=> Nicotinamide + alpha-D-Ribose 1-phosphate	Nicotinate and nicotinamide metabolism	2.4.2.1
0.0195	0.003	0.036	R02298	Pyrimidine-nucleoside:orthophosphate alpha-D-ribosyltransferase	Pyrimidine nucleoside + Orthophosphate <=> Pyrimidine + alpha-D-Ribose 1-phosphate		2.4.2.2
0.0195	0.003	0.036	R02172	N-D-Ribosylpyrimidine ribohydrolase	Pyrimidine nucleoside + H2O <=> Pyrimidine + D-Ribose		3.2.2.8
0.019	0.037	0.001	EC706	Acetaldehyde dehydrogenase	[c]accoa + (2) h + (2) nadh <==> coa + etoh + (2) nad	Pyruvate metabolism	EC-Undetermined
0.019	0.037	0.001	EC052	glycerol kinase	[c]atp + glyc --> adp + glyc3p + h	Alternate Carbon Metabolism	EC-2.7.1.30
0.019	0.003	0.035	EC604	purine-nucleoside phosphorylase (Xanthosine)	[c]pi + xtsn <==> r1p + xan	Nucleotide Salvage Pathways	EC-2.4.2.1
0.019	0	0.038	R01549	dATP:uridine 5\'-phosphotransferase	dATP + Uridine <=> dADP + UMP	Pyrimidine metabolism	2.7.1.48
0.0185	0.037	0	EC118	L(+)-tartrate dehydratase	[c]tartr-L --> h2o + oaa	Alternate Carbon Metabolism	EC-4.2.1.32
0.0185	0.026	0.011	R01323	Acetyl-CoA:citrate CoA-transferase	Acetyl-CoA + Citrate <=> Acetate + (3S)-Citryl-CoA	Citrate cycle (TCA cycle)	2.8.3.10
0.0185	0.021	0.016	R01662	3-Phospho-D-glyceroyl phosphate 2,3-phosphomutase	3-Phospho-D-glyceroyl phosphate <=> 2,3-Bisphospho-D-glycerate	Glycolysis / Gluconeogenesis	5.4.2.1 5.4.2.4
0.0185	0.011	0.026	R01256	(S)-Malate:CoA ligase (ADP-forming)	ATP + (S)-Malate + CoA <=> ADP + Orthophosphate + (3S)-3-Carboxy-3-hydroxypropanoyl-CoA	Glyoxylate and dicarboxylate metabolism	6.2.1.9
0.0185	0.009	0.028	EC591	5'-nucleotidase (dCMP)	[c]dcmp + h2o --> dcyt + pi	Nucleotide Salvage Pathways	EC-3.1.3.5
0.0185	0.003	0.034	R01271	Nicotinamide-nucleotide:pyrophosphate phospho-alpha-D-ribosyltransferase	Nicotinamide D-ribonucleotide + Pyrophosphate <=> Nicotinamide + 5-Phospho-alpha-D-ribose 1-diphosphate	Nicotinate and nicotinamide metabolism	2.4.2.12
0.018	0.032	0.004	EC435	glutamate dehydrogenase (NADP)	[c]glu-L + h2o + nadp <==> akg + h + nadph + nh4	Glutamate metabolism	EC-1.4.1.4
0.018	0.014	0.022	R01742	D-Gluconate:(acceptor) 2-oxidoreductase	D-Gluconic acid + Acceptor <=> 2-Dehydro-D-gluconate + Reduced acceptor		1.1.99.3
0.018	0.012	0.024	R02850	dATP:D-hexose 6-phosphotransferase	dATP + D-Hexose <=> dADP + D-Hexose 6-phosphate		2.7.1.1
0.0175	0.03	0.005	EC097	Phosphofructokinase	[c]atp + tag6p-D --> adp + h + tagdp-D	Alternate Carbon Metabolism	EC-2.7.1.11
0.0175	0.016	0.019	R05652	taurine:pyruvate aminotransferase	Taurine + Pyruvate <=> Sulfoacetaldehyde + L-Alanine	Taurine and hypotaurine metabolism	2.6.1.77
0.0175	0.016	0.019	R01873	Quinate:pyrroloquinoline-quinone 5-oxidoreductase	Quinate + PQQ <=> PQQH2 + 3-Dehydroquinate	Phenylalanine, tyrosine and tryptophan biosynthesis	1.1.99.25
0.0175	0.005	0.03	R03346	Nicotinate D-ribonucleotide phosphohydrolase	Nicotinate D-ribonucleotide + H2O <=> Nicotinate D-ribonucleoside + Orthophosphate	Nicotinate and nicotinamide metabolism	3.1.3.5
0.0175	0.004	0.031	R01175	Butanoyl-CoA:oxygen 2-oxidoreductase	Butanoyl-CoA + FAD <=> FADH2 + Crotonoyl-CoA	Fatty acid metabolism	1.3.3.6 1.3.99.2 1.3.99.3 1.3.99.-
0.017	0.032	0.002	EC437	glutamate synthase (NADPH)	[c]akg + gln-L + h + nadph --> (2) glu-L + nadp	Glutamate metabolism	EC-1.4.1.13
0.017	0.03	0.004	EC034	Dihydroxyacetone phosphotransferase	[c]dha + pep --> dhap + pyr	Alternate Carbon Metabolism
0.017	0.025	0.009	EC332	D-alanine transaminase	[c]ala-D + pydx5p --> pyam5p + pyr	Cofactor and Prosthetic Group Biosynthesis
0.017	0.023	0.011	R00755		Acetaldehyde + Thiamin diphosphate <=> 2-(alpha-Hydroxyethyl)thiamine diphosphate	Glycolysis / Gluconeogenesis	4.1.1.1
0.017	0.011	0.023	R05115	Acylneuraminyl hydrolase	GT1b + N-Acetylneuraminate <=> GQ1 + H2O		3.2.1.18
0.017	0.011	0.023	R05114		CMP-N-acetylneuraminate + GT1b <=> CMP + GQ1		2.4.99.-
0.017	0.008	0.026	R06863	D-Sedoheptulose-7-phosphate:thiamin diphosphate glycolaldehydetransferase	D-Sedoheptulose 7-phosphate + Thiamin diphosphate <=> alpha,beta-Dihydroxyethyl-TPP + D-Ribose 5-phosphate		2.2.1.1
0.0165	0.033	0	R00654	L-Methionine methanethiol-lyase (deaminating)	L-Methionine + H2O <=> Methanethiol + NH3 + 2-Oxobutanoate		4.4.1.11
0.0165	0.032	0.001	EC283	succinate dehydrogenase	[c]fad + succ --> fadh2 + fum	Citrate Cycle (TCA)	EC-1.3.99.1
0.0165	0.031	0.002	R00588	L-Serine:glyoxylate aminotransferase	L-Serine + Glyoxylate <=> Hydroxypyruvate + Glycine	Glycine, serine and threonine metabolism	2.6.1.45
0.0165	0.025	0.008	EC596	5'-nucleotidase (XMP)	[c]h2o + xmp --> pi + xtsn	Nucleotide Salvage Pathways	EC-3.1.3.5
0.0165	0.016	0.017	R01819	D-Mannose-6-phosphate ketol-isomerase	D-Mannose 6-phosphate <=> beta-D-Fructose 6-phosphate	Fructose and mannose metabolism	5.3.1.8
0.0165	0.012	0.021	R00534	D-Glucose 6-sulfate sulfohydrolase	D-Glucose 6-sulfate + H2O <=> D-Glucose + Sulfate		3.1.6.3
0.0165	0.007	0.026	R01152	N-Carbamoylputrescine amidohydrolase	N-Carbamoylputrescine + H2O <=> Putrescine + CO2 + NH3	Arginine and proline metabolism	3.5.1.53
0.0165	0.006	0.027	R04634		N-Acetyl-D-galactosaminyl-(N-acetylneuraminyl)-D-galactosyl-D- glucosylceramide + H2O <=> GA2 + N-Acetylneuraminate		3.2.1.18
0.0165	0.006	0.027	R04630	CMP-N-acetylneuraminate:lactosylceramide alpha-2,3-N-acetylneuraminyltransferase	CMP-N-acetylneuraminate + GA2 <=> CMP + N-Acetyl-D-galactosaminyl-(N-acetylneuraminyl)-D-galactosyl-D- glucosylceramide		2.4.99.9
0.0165	0.006	0.027	EC589	5'-nucleotidase (dAMP)	[c]damp + h2o --> dad-2 + pi	Nucleotide Salvage Pathways	EC-3.1.3.5
0.0165	0.005	0.028	R01279	Palmitoyl-CoA:oxygen 2-oxidoreductase	Palmitoyl-CoA + FAD <=> trans-Hexadec-2-enoyl-CoA + FADH2	Fatty acid metabolism	1.3.3.6 1.3.99.3 1.3.99.13 1.3.99.-
0.0165	0	0.033	R01886	N(omega)-(ADP-D-ribosyl)-L-arginine ADPribosylhydrolase	N(omega)-(ADP-D-ribosyl)-L-arginine + H2O <=> L-Arginine + ADP-ribose		3.2.2.19
0.0165	0	0.033	R00555	NAD+:L-arginine ADP-D-ribosyltransferase	NAD+ + L-Arginine <=> Nicotinamide + N(omega)-(ADP-D-ribosyl)-L-arginine		2.4.2.31
0.0165	0	0.033	R00396	L-Alanine:NAD+ oxidoreductase (deaminating)	L-Alanine + NAD+ + H2O <=> Pyruvate + NH3 + NADH + H+	Taurine and hypotaurine metabolism,Reductive carboxylate cycle (CO2 fixation)	1.4.1.1
0.016	0.032	0	R04467		N6-Acetyl-LL-2,6-diaminoheptanedioate + 2-Oxoglutarate <=> N-Acetyl-L-2-amino-6-oxopimelate + L-Glutamate	Lysine biosynthesis	2.6.1.-
0.016	0.032	0	R04364	Acetyl-CoA:L-2,3,4,5-tetrahydrodipicolinate N2-acetyltransferase	2,3,4,5-Tetrahydrodipicolinate + Acetyl-CoA + H2O <=> N-Acetyl-L-2-amino-6-oxopimelate + CoA	Lysine biosynthesis	2.3.1.89
0.016	0.032	0	R02733	N6-Acetyl-LL-2,6-diaminoheptanedioate amidohydrolase	N6-Acetyl-LL-2,6-diaminoheptanedioate + H2O <=> Acetate + LL-2,6-Diaminoheptanedioate	Lysine biosynthesis	3.5.1.47
0.016	0.032	0	EC433	formyltetrahydrofolate deformylase	[c]10fthf + h2o --> for + h + thf	Folate Metabolism	EC-3.5.1.10
0.016	0.025	0.007	R07166	D-amino-acid:(acceptor) oxidoreductase (deaminating)	D-Amino acid + H2O + Acceptor <=> 2-Oxo acid + NH3 + Reduced acceptor		1.4.99.1
0.016	0.021	0.011	R01748	D-Glycerate-2-phosphate phosphohydrolase	2-Phospho-D-glycerate + H2O <=> D-Glycerate + Orthophosphate		3.1.3.20
0.016	0.011	0.021	R01741	D-Gluconate:(acceptor) 2-oxidoreductase	D-Gluconic acid + FAD <=> 2-Dehydro-D-gluconate + FADH2	Pentose phosphate pathway	1.1.99.3
0.016	0.01	0.022	R01327	ITP:D-hexose 6-phosphotransferase	ITP + D-Mannose <=> IDP + D-Mannose 6-phosphate		2.7.1.1
0.016	0.009	0.023	R01204	Acetyl-CoA:D-glucosamine N-acetyltransferase	Acetyl-CoA + D-Glucosamine <=> CoA + N-Acetyl-D-glucosamine	Aminosugars metabolism	2.3.1.3
0.016	0.006	0.026	R02372	dUTP:cytidine 5\'-phosphotransferase	dUTP + Cytidine <=> dUDP + CMP	Pyrimidine metabolism	2.7.1.48
0.016	0.006	0.026	R01684	Taurine:2-oxoglutarate aminotransferase	Taurine + 2-Oxoglutarate <=> Sulfoacetaldehyde + L-Glutamate		2.6.1.55
0.016	0.002	0.03	R01080	Uridine ribohydrolase	Uridine + H2O <=> Uracil + D-Ribose	Pyrimidine metabolism	3.2.2.3
0.0155	0.031	0	EC334	glutathione oxidoreductase	[c]gthox + h + nadph <==> (2) gthrd + nadp	Cofactor and Prosthetic Group Biosynthesis	EC-1.6.4.2
0.0155	0.028	0.003	R00466	Glyoxylate:oxygen oxidoreductase	Glyoxylate + Oxygen + H2O <=> Oxalate + H2O2	Glyoxylate and dicarboxylate metabolism	1.2.3.5
0.0155	0.002	0.029	R04648	CMP-N-acetylneuraminate:D-galactosyl-N-acetyl-D-galactosaminyl-(N- acetylneuraminyl)-D-galactosyl-D-glucosylceramide N-acetylneuraminyltransferase	CMP-N-acetylneuraminate + D-Galactosyl-N-acetyl-D-galactosaminyl-(N-acetylneuraminyl)-D- galactosyl-D-glucosylceramide <=> CMP + N-Acetylneuraminyl-D-galactosyl-N-acetyl-D-galactosaminyl-(N- acetylneuraminyl)-D-galactosyl-D-glucosylceramide		2.4.99.2 2.4.99.4
0.015	0.024	0.006	R01265	L-Amino acid racemase	L-Amino acid <=> D-Amino acid		5.1.1.10
0.015	0.021	0.009	EC010	D-Amino acid dehydrogenase	[c]ala-D + fad + h2o --> fadh2 + nh4 + pyr	Alanine and aspartate metabolism	EC-1.4.99.1
0.015	0.013	0.017	R07167	taurine:(acceptor) oxidoreductase (deaminating)	Taurine + H2O + Acceptor <=> Sulfoacetaldehyde + NH3 + Reduced acceptor		1.4.99.2
0.015	0.007	0.023	R03347		Nicotinate D-ribonucleotide + ADP <=> Nicotinate D-ribonucleoside + ATP	Nicotinate and nicotinamide metabolism	2.7.1.-
0.015	0.006	0.024	R02111	1,4-alpha-D-Glucan:orthophosphate alpha-D-glucosyltransferase	Starch + Orthophosphate <=> Amylose + D-Glucose 1-phosphate	Starch and sucrose metabolism	2.4.1.1
0.015	0.006	0.024	R02109	Dextrin 6-alpha-D-glucanohydrolase	Starch + H2O <=> Amylose + alpha-D-Glucose	Starch and sucrose metabolism	3.2.1.33
0.015	0.002	0.028	EC550	hypoxanthine phosphoribosyltransferase (Hypoxanthine)	[c]hxan + prpp --> imp + ppi	Nucleotide Salvage Pathways	EC-2.4.2.8
0.0145	0.029	0	R01769	Hypoxanthine:oxygen oxidoreductase	Hypoxanthine + Oxygen + H2O <=> Xanthine + H2O2	Purine metabolism	1.17.3.2
0.0145	0.029	0	R00533	Sulfite:oxygen oxidoreductase	Sulfite + Oxygen + H2O <=> Sulfate + H2O2	Sulfur metabolism	1.8.3.1
0.0145	0.029	0	EC446	L-threonine dehydrogenase	[c]nad + thr-L --> 2aobut + h + nadh	Glycine and Serine Metabolism	EC-1.1.1.103
0.0145	0.029	0	EC441	glycine C-acetyltransferase (irreversible)	[c]2aobut + coa --> accoa + gly	Glycine and Serine Metabolism	EC-2.3.1.29
0.0145	0.028	0.001	R07316	carbamate hydro-lyase	Carbamate <=> NH3 + CO2		4.2.1.104
0.0145	0.028	0.001	R01395	ATP:carbamate phosphotransferase	ATP + Carbamate <=> ADP + Carbamoyl phosphate	Nitrogen metabolism	2.7.2.2
0.0145	0.017	0.012	R00282	NADPH:(quinone-acceptor) oxidoreductase	Acceptor + NADPH + H+ <=> Reduced acceptor + NADP+		1.6.99.1 1.6.99.6
0.0145	0.011	0.018	R02658	ATP:2-dehydro-D-gluconate 6-phosphate	ATP + 2-Dehydro-D-gluconate <=> ADP + 6-Phospho-2-dehydro-D-gluconate	Pentose phosphate pathway	2.7.1.13
0.0145	0.006	0.023	R03491		beta-D-Galactosyl-1,4-beta-D-glucosylceramide + N-Acetylneuraminate <=> GM3 + H2O		3.2.1.18
0.0145	0.003	0.026	EC595	5'-nucleotidase (IMP)	[c]h2o + imp --> ins + pi	Nucleotide Salvage Pathways	EC-3.1.3.5
0.0145	0.002	0.027	R04650		D-Galactosyl-N-acetyl-D-galactosaminyl-(N-acetylneuraminyl)-D- galactosyl-D-glucosylceramide + N-Acetylneuraminate <=> N-Acetylneuraminyl-D-galactosyl-N-acetyl-D-galactosaminyl-(N- acetylneuraminyl)-D-galactosyl-D-glucosylceramide + H2O		3.2.1.18
0.0145	0	0.029	R00181	AMP aminohydrolase	AMP + H2O <=> IMP + NH3	Purine metabolism	3.5.4.6 3.5.4.17
0.014	0.016	0.012	R01607	3-Oxopropanoate:NADP+ oxidoreductase	3-Oxopropanoate + NADP+ + H2O <=> Malonate + NADPH + H+	beta-Alanine metabolism	1.2.1.15
0.014	0.014	0.014	R00610	Sarcosine:oxygen oxidoreductase (demethylating)	Sarcosine + H2O + Oxygen <=> Glycine + Formaldehyde + H2O2	Glycine, serine and threonine metabolism	1.5.3.1
0.014	0.013	0.015	R00366	Aminoacetic acid:oxygen oxidoreductase (deaminating)	Glycine + H2O + Oxygen <=> Glyoxylate + NH3 + H2O2	Glycine, serine and threonine metabolism	1.4.3.3 1.4.3.19
0.014	0.008	0.02	R00957	alpha-D-Glucose-1-phosphate:alpha-D-glucose-1-phosphate 4-alpha-D-glucosyltransferase (dephosphorylating)	2 D-Glucose 1-phosphate + H2O <=> Maltose + 2 Orthophosphate		2.4.1.139
0.014	0.007	0.021	R01178	Butanoyl-CoA:(acceptor) 2,3-oxidoreductase	Butanoyl-CoA + Acceptor <=> Crotonoyl-CoA + Reduced acceptor		1.3.99.2
0.014	0.006	0.022	R05117		GT1b + H2O <=> GD1b + N-Acetylneuraminate		3.2.1.18
0.014	0.003	0.025	R02324	ATP:N-ribosylnicotinamide 5\'-phosphotransferase	ATP + N-Ribosylnicotinamide <=> ADP + Nicotinamide D-ribonucleotide	Nicotinate and nicotinamide metabolism	2.7.1.22
0.0135	0.027	0	EC114	2-Oxobutanoate formate lyase	[c]2obut + coa --> for + ppcoa	Alternate Carbon Metabolism
0.0135	0.026	0.001	EC134	Propanoyl-CoA: succinate CoA-transferase	[c]ppcoa + succ --> ppa + succoa	Alternate Carbon Metabolism
0.0135	0.018	0.009	R00476	Glycolate:(acceptor) 2-oxidoreductase	Glycolate + Acceptor <=> Glyoxylate + Reduced acceptor	Glyoxylate and dicarboxylate metabolism	1.1.99.14
0.0135	0.015	0.012	EC196	Phosphatidate phosphatase	[c]h2o + (0.02) pa_EC --> (0.02) 12dgr_EC + pi	Cell Envelope Biosynthesis	EC-3.1.3.4
0.0135	0.012	0.015	R03172	2-Methylbutanoyl-CoA:(acceptor) 2,3-oxidoreductase	2-Methylbutanoyl-CoA + FAD <=> 2-Methylbut-2-enoyl-CoA + FADH2	Valine, leucine and isoleucine degradation	1.3.99.3 1.3.99.12
0.0135	0.012	0.015	R02293	L-2,4-Diaminobutanoate:pyruvate aminotransferase	L-2,4-Diaminobutanoate + Pyruvate <=> L-Aspartate 4-semialdehyde + L-Alanine		2.6.1.46
0.0135	0.01	0.017	R02050	(R)-3-Amino-2-methylpropanoate:pyruvate aminotransferase	(R)-3-Amino-2-methylpropanoate + Pyruvate <=> 2-Methyl-3-oxopropanoate + L-Alanine		2.6.1.40
0.0135	0.01	0.017	R02048	(R)-3-Amino-2-methylpropanoate:2-oxoglutarate aminotransferase	(R)-3-Amino-2-methylpropanoate + 2-Oxoglutarate <=> 2-Methyl-3-oxopropanoate + L-Glutamate		2.6.1.40
0.0135	0.008	0.019	R00724	ITP:pyruvate O2-phosphotransferase	ITP + Pyruvate <=> IDP + Phosphoenolpyruvate		2.7.1.40
0.0135	0.007	0.02	R00155	UDP diphosphohydrolase	UDP + H2O <=> UMP + Orthophosphate	Pyrimidine metabolism	3.6.1.5 3.6.1.6
0.0135	0.006	0.021	R00689	L-Phenylalanine:oxygen oxidoreductase (deaminating)	L-Phenylalanine + H2O + Oxygen <=> Phenylpyruvate + NH3 + H2O2	Phenylalanine metabolism,Phenylalanine, tyrosine and tryptophan biosynthesis	1.4.3.2
0.0135	0.005	0.022	R03488	CMP-N-acetylneuraminate:lactosylceramide alpha-2,3-N-acetylneuraminyltransferase	CMP-N-acetylneuraminate + beta-D-Galactosyl-1,4-beta-D-glucosylceramide <=> CMP + GM3		2.4.99.9
0.0135	0.001	0.026	R02139	Barbiturate amidohydrolase	Barbiturate + 2 H2O <=> Malonate + Urea	Pyrimidine metabolism	3.5.2.1
0.0135	0.001	0.026	R00976	uracil:acceptor oxidoreductase	Uracil + Acceptor + H2O <=> Barbiturate + Reduced acceptor	Pyrimidine metabolism	1.17.99.4
0.013	0.026	0	R00205	2-Oxopropanal:NADP+ oxidoreductase	Methylglyoxal + NADP+ + H2O <=> Pyruvate + NADPH	Pyruvate metabolism	1.2.1.49
0.013	0.025	0.001	EC457	hexokinase (D-glucose:ATP)	[c]atp + glc-D --> adp + g6p + h	Glycolysis/Gluconeogenesis	EC-2.7.1.1
0.013	0.022	0.004	R01220	5,10-methylenetetrahydrofolate:NADP+ oxidoreductase	5,10-Methylenetetrahydrofolate + NADP+ <=> 5,10-Methenyltetrahydrofolate + NADPH + H+	Glyoxylate and dicarboxylate metabolism,One carbon pool by folate	1.5.1.5
0.013	0.021	0.005	R00864		Sulfite + Sulfur <=> Thiosulfate	Sulfur metabolism
0.013	0.016	0.01	R00410	Succinyl-CoA:3-oxo-acid CoA-transferase	Succinyl-CoA + Acetoacetate <=> Succinate + Acetoacetyl-CoA	Synthesis and degradation of ketone bodies,Valine, leucine and isoleucine degradation,Butanoate metabolism	2.8.3.5
0.013	0.014	0.012	R01559	Succinyl-CoA:oxalate CoA-transferase	Succinyl-CoA + Oxalate <=> Succinate + Oxalyl-CoA	Glyoxylate and dicarboxylate metabolism	2.8.3.2
0.013	0.014	0.012	R00611	Sarcosine:(acceptor) oxidoreductase (demethylating)	Sarcosine + Acceptor + H2O <=> Glycine + Formaldehyde + Reduced acceptor	Urea cycle and metabolism of amino groups,Glycine, serine and threonine metabolism	1.5.99.1
0.013	0.013	0.013	R01146		Methanol + PQQ <=> PQQH2 + Formaldehyde	Methane metabolism	1.1.99.8
0.013	0.01	0.016	R01326	ATP:D-glucose 6-phosphotransferase	ATP + D-Mannose <=> ADP + D-Mannose 6-phosphate	Fructose and mannose metabolism	2.7.1.1 2.7.1.7
0.013	0.009	0.017	R00300	D-Glucose:NAD+ 1-oxidoreductase	D-Glucose + NAD+ <=> D-Glucono-1,5-lactone + NADH + H+		1.1.1.118
0.013	0.007	0.019	R00919		Propanoyl-CoA + NADP+ <=> Propenoyl-CoA + NADPH	Propanoate metabolism	1.3.1.-
0.013	0.006	0.02	R05116		CMP-N-acetylneuraminate + GD1b <=> CMP + GT1b		2.4.99.4
0.013	0.005	0.021	EC526	deoxyadenylate kinase	[c]atp + damp <==> adp + dadp	Nucleotide Salvage Pathways	EC-2.7.4.11
0.013	0.003	0.023	R01967	ATP:deoxyguanosine 5\'-phosphotransferase	ATP + Deoxyguanosine <=> ADP + dGMP	Purine metabolism	2.7.1.113
0.013	0.001	0.025	R00552	L-Arginine iminohydrolase	L-Arginine + H2O <=> L-Citrulline + NH3	Arginine and proline metabolism	3.5.3.6
0.013	0.001	0.025	EC552	insosine kinase	[c]atp + ins --> adp + h + imp	Nucleotide Salvage Pathways	EC-2.7.1.73
0.0125	0.022	0.003	R00338	Oxaloacetate acetylhydrolase	Oxaloacetate + H2O <=> Oxalate + Acetate		3.7.1.1
0.0125	0.02	0.005	R02026	O-Acetyl-L-homoserine acetate-lyase (adding methanethiol)	O-Acetyl-L-homoserine + Thiosulfate + Thioredoxin + H+ <=> L-Homocysteine + Sulfite + Oxidized thioredoxin + Acetate	Methionine metabolism	2.5.1.49
0.0125	0.018	0.007	EC145	phosphoenolpyruvate carboxykinase	[c]atp + oaa --> adp + co2 + pep	Anaplerotic reactions	EC-4.1.1.49
0.0125	0.016	0.009	EC030	deoxyribose-phosphate aldolase	[c]2dr5p --> acald + g3p	Alternate Carbon Metabolism	EC-4.1.2.4
0.0125	0.016	0.009	EC028	phosphopentomutase 2 (deoxyribose)	[c]2dr1p <==> 2dr5p	Alternate Carbon Metabolism	EC-5.4.2.7
0.0125	0.014	0.011	R00754	Ethanol:NAD+ oxidoreductase	Ethanol + NAD+ <=> Acetaldehyde + NADH + H+	Glycolysis / Gluconeogenesis	1.1.1.1 1.1.1.71
0.0125	0.011	0.014	R00672	L-Ornithine racemase	L-Ornithine <=> D-Ornithine	D-Arginine and D-ornithine metabolism	5.1.1.9 5.1.1.10 5.1.1.12
0.0125	0.009	0.016	R00159	UTP diphosphohydrolase	UTP + H2O <=> UDP + Orthophosphate	Pyrimidine metabolism	3.6.1.5 3.6.1.39
0.0125	0.008	0.017	R01519	D-Glucono-1,5-lactone lactonohydrolase	D-Glucono-1,5-lactone + H2O <=> D-Gluconic acid	Pentose phosphate pathway	3.1.1.17
0.0125	0.006	0.019	R02739	alpha-D-Glucose 6-phosphate ketol-isomerase	alpha-D-Glucose 6-phosphate <=> beta-D-Glucose 6-phosphate	Glycolysis / Gluconeogenesis,Pentose phosphate pathway	5.1.3.15 5.3.1.9
0.0125	0.006	0.019	R00458	N6-Acyl-L-lysine amidohydrolase	N6-Acetyl-L-lysine + H2O <=> Acetate + L-Lysine	Lysine degradation	3.5.1.17
0.012	0.024	0	R02300	S-Aminomethyldihydrolipoylprotein:(6S)-tetrahydrofolate aminomethyltransferase (ammonia-forming)	5-Formyltetrahydrofolate <=> 5,10-Methenyltetrahydrofolate + H2O	One carbon pool by folate	2.1.2.10
0.012	0.022	0.002	R00676	L-Tryptophan:NADP+ oxidoreductase (deaminating)	L-Tryptophan + NADP+ + H2O <=> Indolepyruvate + NH3 + NADPH + H+		1.4.1.19
0.012	0.016	0.008	R01604	3-Oxopropanoate:NAD+ oxidoreductase	3-Oxopropanoate + NAD+ + H2O <=> Malonate + NADH + H+	beta-Alanine metabolism	1.2.1.15
0.012	0.015	0.009	R00280	Nitric-oxide:(acceptor) oxidoreductase	Acceptor + 2 Nitric oxide + 2 H2O <=> Reduced acceptor + 2 Nitrite		1.7.2.1
0.012	0.014	0.01	R00602	Hydorogen-peroxide:hydrogen-peroxide oxidoreductase	Methanol + H2O2 <=> Formaldehyde + 2 H2O	Methane metabolism	1.11.1.6 1.11.1.7
0.012	0.012	0.012	R06154	methylamine:oxygen oxidoreductase (deaminating) (copper-containing)	Methylamine + Oxygen + H2O <=> Formaldehyde + NH3 + H2O2		1.4.3.6
0.012	0.012	0.012	R00606	Methylamine:(acceptor) oxidoreductase (deaminating)	Methylamine + H2O <=> Formaldehyde + NH3 + 2 H+	Methane metabolism	1.4.99.3
0.012	0.009	0.015	R06977	L-2,4-diaminobutyrate:2-oxoglutarate 4-aminotransferase	L-Glutamate + L-Aspartate 4-semialdehyde <=> 2-Oxoglutarate + L-2,4-Diaminobutanoate	Glycine, serine and threonine metabolism	2.6.1.76
0.012	0.009	0.015	R00791	Nitrite:ferredoxin oxidoreductase	Nitrite + H2O + 2 Oxidized ferredoxin <=> Nitrate + 2 Reduced ferredoxin	Nitrogen metabolism	1.7.7.2
0.012	0.009	0.015	R00473	(3S)-3-Carboxy-3-hydroxypropanoyl-CoA glyoxylate-lyase	(3S)-3-Carboxy-3-hydroxypropanoyl-CoA <=> Acetyl-CoA + Glyoxylate	Glyoxylate and dicarboxylate metabolism	4.1.3.24
0.012	0.006	0.018	R01961	ATP:D-glucosamine phosphotransferase	ATP + D-Glucosamine <=> ADP + D-Glucosamine 6-phosphate	Aminosugars metabolism	2.7.1.1 2.7.1.8
0.012	0.005	0.019	R01230	Xanthosine-5\'-phosphate:ammonia ligase (AMP-forming)	ATP + Xanthosine 5\'-phosphate + NH3 <=> AMP + Pyrophosphate + GMP	Purine metabolism	6.3.4.1
0.012	0.004	0.02	R00924	Propanoyl-CoA:(acceptor) 2,3-oxidoreductase	Propanoyl-CoA + FAD <=> FADH2 + Propenoyl-CoA	beta-Alanine metabolism	1.3.99.3
0.012	0.002	0.022	R00088	ATP aminohydrolase	ATP + H2O <=> ITP + NH3		3.5.4.18
0.012	0.002	0.022	EC548	deoxyguanylate kinase (dGMP:ATP)	[c]atp + dgmp <==> adp + dgdp	Nucleotide Salvage Pathways	EC-2.7.4.8
0.012	0.001	0.023	R06540	leucocyanidin,2-oxoglutarate:oxygen oxidoreductase	cis-3,4-Leucopelargonidin + 2-Oxoglutarate + Oxygen <=> Dihydrokaempferol + Succinate + CO2 + H2O	Flavonoid biosynthesis	1.14.11.19
0.012	0.001	0.023	R03123	cis-3,4-leucopelargonidin:NADP+ 4-oxidoreductase	cis-3,4-Leucopelargonidin + NADP+ <=> Dihydrokaempferol + NADPH + H+	Flavonoid biosynthesis	1.1.1.219
0.0115	0.023	0	R07211	L-phenylalanine,tetrahydrobiopterin:oxygen oxidoreductase(4-hydroxylating)	L-Phenylalanine + Tetrahydrobiopterin + Oxygen <=> L-Tyrosine + 4a-Hydroxytetrahydrobiopterin		1.14.16.1
0.0115	0.023	0	R03051	2,3-Dihydroxy-3-methylbutanoate:NADP+ oxidoreductase (isomerizing)	2-Acetolactate + NADPH + H+ <=> 2,3-Dihydroxy-3-methylbutanoate + NADP+	Pantothenate and CoA biosynthesis	1.1.1.86
0.0115	0.023	0	R01209	2,3-Dihydroxy-3-methylbutanoate hydro-lyase	2,3-Dihydroxy-3-methylbutanoate <=> 3-Methyl-2-oxobutanoic acid + H2O	Pantothenate and CoA biosynthesis	4.2.1.9
0.0115	0.014	0.009	EC467	glycerate kinase	[c]atp + glyc-R --> 3pg + adp + h	Glyoxylate Metabolism	EC-2.7.1.31
0.0115	0.012	0.011	R00017	Ferrocytochrome-c:hydrogen-peroxide oxidoreductase	H2O2 + 2 Ferrocytochrome c <=> 2 Ferricytochrome c + 2 H2O		1.11.1.5
0.0115	0.01	0.013	R01872	Quinate:NAD+ 5-oxidoreductase	Quinate + NAD+ <=> 3-Dehydroquinate + NADH + H+	Phenylalanine, tyrosine and tryptophan biosynthesis	1.1.1.24 1.1.1.282
0.0115	0.009	0.014	R04188	L-3-Amino-isobutanoate:2-oxoglutarate aminotransferase	L-3-Amino-isobutanoate + 2-Oxoglutarate <=> (S)-Methylmalonate semialdehyde + L-Glutamate	Valine, leucine and isoleucine degradation	2.6.1.22
0.0115	0.009	0.014	R04187	L-Alanine:3-oxopropanoate aminotransferase	L-Alanine + (S)-Methylmalonate semialdehyde <=> Pyruvate + L-3-Amino-isobutanoate	Valine, leucine and isoleucine degradation	2.6.1.18
0.0115	0.008	0.015	R02570	Succinyl-CoA:dihydrolipoamide S-succinyltransferase	Succinyl-CoA + Dihydrolipoamide <=> CoA + S-Succinyldihydrolipoamide	Citrate cycle (TCA cycle)	2.3.1.61
0.0115	0.005	0.018	R02732	ATP:D-fructose-6-phosphate 2-phosphotransferase	ATP + beta-D-Fructose 6-phosphate <=> ADP + beta-D-Fructose 2,6-bisphosphate	Fructose and mannose metabolism	2.7.1.105
0.0115	0.003	0.02	R00122	ATP pyrophosphohydrolase	ADP + H2O <=> AMP + Orthophosphate	Purine metabolism	3.6.1.5
0.0115	0.001	0.022	R01308		4-Hydroxybenzoate + Acetate + NADH + H+ <=> 4-Coumarate + 2 H2O + NAD+	Phenylalanine metabolism
0.011	0.022	0	R03198	(R)-4-dehydropantoate:NAD+ 4-oxidoreductase	(R)-4-Dehydropantoate + NAD+ + H2O <=> (R)-3,3-Dimethylmalate + NADH + H+	Pantothenate and CoA biosynthesis	1.2.1.33
0.011	0.022	0	R02471		(R)-Pantoate + NAD+ <=> (R)-4-Dehydropantoate + NADH + H+	Pantothenate and CoA biosynthesis	1.1.1.106
0.011	0.022	0	R01211	(R)-3,3-Dimethylmalate:NAD+ oxidoreductase (decarboxylating)	(R)-3,3-Dimethylmalate + NAD+ <=> 3-Methyl-2-oxobutanoic acid + CO2 + NADH	Pantothenate and CoA biosynthesis	1.1.1.84
0.011	0.015	0.007	R00746	Ethanol:NADP+ oxidoreductase	Ethanol + NADP+ <=> Acetaldehyde + NADPH	Glycolysis / Gluconeogenesis	1.1.1.2 1.1.1.71
0.011	0.01	0.012	R06862	alpha,beta-Dihydroxyethyl-TPP:formaldehyde glycolaldehydetransferase	alpha,beta-Dihydroxyethyl-TPP + Formaldehyde <=> Thiamin diphosphate + Glycerone		2.2.1.3
0.011	0.01	0.012	R03232	Protein-N(pai)-phosphohistidine:sugar N(pai)-phosphotransferase	Protein N(pi)-phospho-L-histidine + D-Fructose <=> Protein histidine + D-Fructose 1-phosphate	Fructose and mannose metabolism	2.7.1.69
0.011	0.009	0.013	R02664		2-Phospho-D-glycerate + ATP <=> 2,3-Bisphospho-D-glycerate + ADP	Glycolysis / Gluconeogenesis	2.7.2.-
0.011	0.007	0.015	R01698	Dihydrolipoamide:NAD+ oxidoreductase	Dihydrolipoamide + NAD+ <=> Lipoamide + NADH	Glycolysis / Gluconeogenesis,Citrate cycle (TCA cycle)	1.8.1.4
0.011	0.006	0.016	R00806	UDPglucose:D-fructose 2-alpha-D-glucosyltransferase	UDP-glucose + D-Fructose <=> UDP + Sucrose	Starch and sucrose metabolism	2.4.1.13
0.011	0.004	0.018	R00952	Cellobiose:orthophosphate alpha-D-glucosyltransferase	Cellobiose + Orthophosphate <=> D-Glucose 1-phosphate + D-Glucose	Starch and sucrose metabolism	2.4.1.20
0.011	0.003	0.019	R02327	dCTP:uridine 5\'-phosphotransferase	dCTP + Uridine <=> dCDP + UMP	Pyrimidine metabolism	2.7.1.48
0.011	0.003	0.019	R02143	Xanthosine ribohydrolase	Xanthosine + H2O <=> Xanthine + D-Ribose	Purine metabolism	3.2.2.1
0.011	0.003	0.019	R01520	beta-D-Glucose:NAD+ 1-oxoreductase	beta-D-Glucose + NAD+ <=> D-Glucono-1,5-lactone + NADH + H+	Pentose phosphate pathway	1.1.1.47
0.011	0.002	0.02	R00123	ADP aminohydrolase	ADP + H2O <=> IDP + NH3		3.5.4.7
0.011	0.001	0.021	R01880	dGTP:uridine 5\'-phosphotransferase	dGTP + Uridine <=> dGDP + UMP	Pyrimidine metabolism	2.7.1.48
0.0105	0.02	0.001	R00675	L-Tryptophan:NAD+ oxidoreductase (deaminating)	L-Tryptophan + NAD+ + H2O <=> Indolepyruvate + NH3 + NADH + H+		1.4.1.19
0.0105	0.018	0.003	EC705	acetyl-CoA synthetase	[c]ac + atp + coa --> accoa + amp + ppi	Pyruvate metabolism	EC-6.2.1.1
0.0105	0.01	0.011	R02703	D-Mannitol-1-phosphate:NAD+ 5-oxidoreductase	D-Mannitol 1-phosphate + NAD+ <=> beta-D-Fructose 6-phosphate + NADH	Fructose and mannose metabolism	1.1.1.17
0.0105	0.009	0.012	R03527	D-Glucoside glucohydrolase	D-Glucoside + H2O <=> ROH + alpha-D-Glucose	Starch and sucrose metabolism	3.2.1.21
0.0105	0.009	0.012	R03526	UDPglucose:phenol beta-D-glucosyltransferase	UDP-glucose + ROH <=> UDP + D-Glucoside	Starch and sucrose metabolism	2.4.1.35
0.0105	0.007	0.014	R03294	trans-4-Hydroxy-L-proline:NAD+ oxidoreductase	trans-4-Hydroxy-L-proline + FAD <=> L-1-Pyrroline-3-hydroxy-5-carboxylate + FADH2	Arginine and proline metabolism	1.5.1.12
0.0105	0.006	0.015	R00557	L-Arginine,NADPH:oxygen oxidoreductase (nitric-oxide-forming)	L-Arginine + Oxygen + NADPH <=> Nitric oxide + L-Citrulline + NADP+	Arginine and proline metabolism	1.14.13.39
0.0105	0.005	0.016	R01521	beta-D-Glucose:NADP+ 1-oxoreductase	beta-D-Glucose + NADP+ <=> D-Glucono-1,5-lactone + NADPH + H+	Pentose phosphate pathway	1.1.1.47
0.0105	0.004	0.017	R03777	Octanoyl-CoA:oxygen 2-oxidoreductase	Octanoyl-CoA + FAD <=> trans-Oct-2-enoyl-CoA + FADH2	Fatty acid metabolism	1.3.3.6 1.3.99.3 1.3.99.13 1.3.99.-
0.0105	0.004	0.017	R03776	trans-Oct-2-enoyl-CoA reductase	Octanoyl-CoA + NADP+ <=> trans-Oct-2-enoyl-CoA + NADPH + H+	Fatty acid elongation in mitochondria	1.3.1.38
0.0105	0.004	0.017	R01441	ATP:cellobiose 6-phosphotransferase	ATP + Cellobiose <=> ADP + 6-Phospho-beta-D-glucosyl-(1,4)-D-glucose		2.7.1.85
0.0105	0.004	0.017	R00839	6-Phospho-beta-D-glucosyl-(1,4)-D-gluxose glucohydrolase	6-Phospho-beta-D-glucosyl-(1,4)-D-glucose + H2O <=> D-Glucose + D-Glucose 6-phosphate		3.2.1.86
0.0105	0.001	0.02	R00279	D-Glutamate(D-aspartate):oxygen oxidoreductase (deaminating)	D-Glutamate + H2O + Oxygen <=> 2-Oxoglutarate + NH3 + H2O2	D-Glutamine and D-glutamate metabolism	1.4.3.7 1.4.3.15
0.01	0.02	0	R07212	L-tyrosine,tetrahydrobiopterin:oxygen oxidoreductase(3-hydroxylating)	L-Tyrosine + Tetrahydrobiopterin + Oxygen <=> 3,4-Dihydroxy-L-phenylalanine + 4a-Hydroxytetrahydrobiopterin		1.14.16.2
0.01	0.02	0	R05704	glycine:acceptor oxidoreductase (hydrogen-cyanide-forming)	Glycine + 2 Acceptor <=> Hydrogen cyanide + CO2 + 2 Reduced acceptor		1.4.99.5
0.01	0.02	0	R01653		10-Formyltetrahydrofolate + Orthophosphate + ADP <=> 5-Formyltetrahydrofolate + ATP + H2O	One carbon pool by folate
0.01	0.02	0	R01199	2-oxobutanoate:ferredoxin 2-oxidoreductase (CoA-propionylating)	Oxidized ferredoxin + 2-Oxobutanoate + CoA <=> Reduced ferredoxin + Propanoyl-CoA + CO2	Propanoate metabolism	1.2.7.1 1.2.7.2
0.01	0.019	0.001	EC183	Proline dehydrogenase	[c]fad + pro-L --> 1pyr5c + fadh2 + h	Arginine and Proline Metabolism	EC-1.5.99.8
0.01	0.015	0.005	R00297	(R)-2-Hydroxy-acid:(acceptor) 2-oxidoreductase	(R)-Lactate + Acceptor <=> Pyruvate + Reduced acceptor		1.1.99.6
0.01	0.009	0.011	R02084	succinyl-CoA:3-hydroxy-3-methylglutarate CoA-transferase	Succinyl-CoA + 3-Hydroxy-3-methylglutarate <=> Succinate + (S)-3-Hydroxy-3-methylglutaryl-CoA		2.8.3.13
0.01	0.009	0.011	R02083	(S)-3-Hydroxy-3-methylglutaryl-CoA hydrolase	(S)-3-Hydroxy-3-methylglutaryl-CoA + H2O <=> CoA + 3-Hydroxy-3-methylglutarate		3.1.2.5
0.01	0.009	0.011	R00281	NADH:(quinone-acceptor) oxidoreductase	Acceptor + NADH + H+ <=> Reduced acceptor + NAD+		1.6.99.3 1.6.99.5
0.01	0.008	0.012	R01700	2-Oxoglutarate:lipoamde 2-oxidoreductase(decarboxylating and acceptor-succinylating)	2-Oxoglutarate + Lipoamide <=> S-Succinyldihydrolipoamide + CO2		1.2.4.2
0.01	0.007	0.013	R02849	ITP:D-hexose 6-phosphotransferase	ITP + D-Hexose <=> IDP + D-Hexose 6-phosphate		2.7.1.1
0.01	0.007	0.013	R02848	ATP:D-hexose 6-phosphotransferase	ATP + D-Hexose <=> ADP + D-Hexose 6-phosphate		2.7.1.1
0.01	0.005	0.015	R03001	D-Methionine:pyruvate aminotransferase	D-Methionine + Pyruvate <=> 4-Methylthio-2-oxobutanoic acid + L-Alanine		2.6.1.41
0.01	0.005	0.015	R01171	Butanoyl-CoA:(acceptor) 2,3-oxidoreductase; Butanoyl-CoA:NAD+ trans-2-oxidoreductase	Butanoyl-CoA + NAD+ <=> Crotonoyl-CoA + NADH + H+	Butanoate metabolism	1.3.1.44 1.3.99.2
0.01	0.005	0.015	EC556	Nucleoside triphosphate pyrophosphorylase (datp)	[c]datp + h2o --> damp + h + ppi	Nucleotide Salvage Pathways
0.01	0	0.02	R01298	4-hydroxybenzoate,NADH:oxygen oxidoreductase (3-hydroxylating)	4-Hydroxybenzoate + Oxygen + NADPH + H+ <=> 3,4-Dihydroxybenzoate + NADP+ + H2O	Benzoate degradation via hydroxylation,2,4-Dichlorobenzoate degradation	1.14.13.2 1.14.13.33
0.0095	0.019	0	R03524	L-cysteine hydrogen-sulfide-lyase (adding HCN)	L-Cysteine + Hydrogen cyanide <=> Hydrogen sulfide + 3-Cyano-L-alanine		4.4.1.9
0.0095	0.017	0.002	EC275	fumarate reductase	[c]2dmmql8 + fum --> 2dmmq8 + succ	Citrate Cycle (TCA)	EC-1.3.99.1
0.0095	0.016	0.003	R04942	L-Serine hydro-lyase (adding homocysteine)	L-Serine + Selenohomocysteine <=> Selenocystathionine + H2O	Selenoamino acid metabolism	4.2.1.22
0.0095	0.016	0.003	R04941	Selenocystathionine L-homocysteine-lyase (deaminating)	Selenocystathionine + H2O <=> Selenohomocysteine + NH3 + Pyruvate	Selenoamino acid metabolism	4.4.1.8
0.0095	0.016	0.003	R02573	Trimethylsulfonium:tetrahydrofolate N-methyltransferase	Trimethylsulfonium + Tetrahydrofolate <=> Dimethyl sulfide + 5-Methyltetrahydrofolate	One carbon pool by folate	2.1.1.19
0.0095	0.016	0.003	R02572	S-Adenosyl-L-methionine:dimethyl-sulfide S-methyltransferase	S-Adenosyl-L-methionine + Dimethyl sulfide <=> S-Adenosyl-L-homocysteine + Trimethylsulfonium		2.1.1.96
0.0095	0.015	0.004	R03140	D-Ribulose 1,5-bisphosphate carboxy-lyase (dimerizing)	D-Ribulose 1,5-bisphosphate + Oxygen <=> 3-Phospho-D-glycerate + 2-Phosphoglycolate	Glyoxylate and dicarboxylate metabolism	4.1.1.39
0.0095	0.015	0.004	EC053	Phosphoglycolate phosphatase	[c]2pglyc + h2o --> glyclt + pi	Alternate Carbon Metabolism	EC-3.1.3.18
0.0095	0.013	0.006	EC079	mannose-6-phosphate isomerase	[c]man6p <==> f6p	Alternate Carbon Metabolism	EC-5.3.1.8
0.0095	0.012	0.007	R00705	3-Oxopropanoate:NAD+ oxidoreductase (decarboxylating, CoA-acetylating)	3-Oxopropanoate + CoA + NAD+ <=> Acetyl-CoA + CO2 + NADH + H+	Inositol metabolism,Alanine and aspartate metabolism,beta-Alanine metabolism,Propanoate metabolism	1.2.1.18 1.2.1.27
0.0095	0.009	0.01	R00706	3-Oxopropanoate:NADP+ oxidoreductase (decarboxylating, CoA-acetylating)	3-Oxopropanoate + CoA + NADP+ <=> Acetyl-CoA + CO2 + NADPH + H+	Inositol metabolism,Alanine and aspartate metabolism,beta-Alanine metabolism,Propanoate metabolism	1.2.1.18
0.0095	0.008	0.011	R02731	D-Fructose-2,6-bisphosphate 2-phosphohydrolase	beta-D-Fructose 2,6-bisphosphate + H2O <=> beta-D-Fructose 6-phosphate + Orthophosphate	Fructose and mannose metabolism	3.1.3.46
0.0095	0.008	0.011	R00475	(S)-2-Hydroxy-acid:oxygen 2-oxidoreductase	Glycolate + Oxygen <=> Glyoxylate + H2O2	Glyoxylate and dicarboxylate metabolism	1.1.3.15
0.0095	0.004	0.015	R00011	Mn(II):hydrogen-peroxide oxidoreductase	2 Manganese + 2 H2O <=> H2O2 + 2 Manganese + 2 H+		1.11.1.13
0.0095	0	0.019	R00728	L-Tyrosine phenol-lyase (deaminating)	L-Tyrosine + H2O <=> Phenol + Pyruvate + NH3	Tyrosine metabolism,Nitrogen metabolism	4.1.99.2
0.009	0.018	0	R00650	S-Adenosyl-L-methionine:L-homocysteine S-methyltransferase	S-Adenosyl-L-methionine + L-Homocysteine <=> S-Adenosyl-L-homocysteine + L-Methionine	Methionine metabolism	2.1.1.10
0.009	0.015	0.003	R01523	ATP:D-ribulose-5-phosphate 1-phosphotransferase	ATP + D-Ribulose 5-phosphate <=> ADP + D-Ribulose 1,5-bisphosphate	Carbon fixation	2.7.1.19
0.009	0.014	0.004	EC037	fructose-1-phosphate kinase	[c]atp + f1p --> adp + fdp + h	Alternate Carbon Metabolism	EC-2.7.1.56
0.009	0.01	0.008	R01354	Propanoate:CoA ligase (AMP-forming)	ATP + Propanoate <=> Pyrophosphate + Propinol adenylate	Propanoate metabolism	6.2.1.1 6.2.1.17
0.009	0.01	0.008	R00926	Propinol adenylate:CoA ligase (AMP-forming)	Propinol adenylate + CoA <=> AMP + Propanoyl-CoA	Propanoate metabolism	6.2.1.1 6.2.1.17
0.009	0.007	0.011	R03173	2-Methylbutanoyl-CoA:(acceptor) oxidoreductase	2-Methylbutanoyl-CoA + Acceptor <=> 2-Methylbut-2-enoyl-CoA + Reduced acceptor		1.3.99.12
0.009	0.005	0.013	R07171	NADH:oxygen oxidoreductase	NADH + H+ + Oxygen <=> NAD+ + H2O2		1.6.3.1
0.009	0.005	0.013	R00305	D-Glucose:(pyrroloquinone-quinone) 1-oxidoreductase	D-Glucose + Acceptor <=> D-Glucono-1,5-lactone + Reduced acceptor	Pentose phosphate pathway	1.1.99.10
0.009	0.004	0.014	R02206	L-Pipecolate:(acceptor) 1,6-oxidoreductase	L-Pipecolate + Acceptor <=> 2,3,4,5-Tetrahydropyridine-2-carboxylate + Reduced acceptor		1.5.99.3
0.009	0.004	0.014	R02205	L-Pipecolate:(acceptor) 1,6-oxidoreductase	L-Pipecolate + FAD <=> FADH2 + 2,3,4,5-Tetrahydropyridine-2-carboxylate	Lysine degradation	1.5.99.3
0.009	0.003	0.015	R01282		Palmitoyl-CoA + Acceptor <=> trans-Hexadec-2-enoyl-CoA + Reduced acceptor
0.009	0.001	0.017	R00737	L-Tyrosine ammonia-lyase	L-Tyrosine <=> 4-Coumarate + NH3	Tyrosine metabolism	4.3.1.5
0.0085	0.017	0	R01090	L-Leucine:2-oxoglutarate aminotransferase	L-Leucine + 2-Oxoglutarate <=> 4-Methyl-2-oxopentanoate + L-Glutamate	Valine, leucine and isoleucine degradation,Valine, leucine and isoleucine biosynthesis	2.6.1.6 2.6.1.42
0.0085	0.017	0	R01078	Dethiobiotin:sulfur sulfurtransferase	Dethiobiotin + Sulfur <=> Biotin	Biotin metabolism	2.8.1.6
0.0085	0.017	0	EC300	biotin synthase (ala-L producing)	[c]cys-L + dtbt <==> ala-L + btn + (2) h	Cofactor and Prosthetic Group Biosynthesis
0.0085	0.012	0.005	R03248	2,5-Diaminopentanoate:2-oxoglutarate aminotransferase	Ornithine + 2-Oxoglutarate <=> 5-Amino-2-oxopentanoic acid + L-Glutamate		2.6.1.8
0.0085	0.009	0.008	R02164	Succinate:ubiquinone oxidoreductase	Ubiquinone + Succinate <=> Ubiquinol + Fumarate	Citrate cycle (TCA cycle)	1.3.5.1
0.0085	0.007	0.01	R00364	Glycine:ferricytochrome-c oxidoreductase (deaminating)	Glycine + H2O + 2 Ferricytochrome c <=> Glyoxylate + NH3 + 2 Ferrocytochrome c	Glycine, serine and threonine metabolism	1.4.2.1
0.0085	0.007	0.01	EC560	Nucleoside triphosphate pyrophosphorylase (dgtp)	[c]dgtp + h2o --> dgmp + h + ppi	Nucleotide Salvage Pathways
0.0085	0.006	0.011	R00113	NADPH:hydrogen-peroxide oxidoreductase	H2O2 + NADPH + H+ <=> NADP+ + 2 H2O		1.11.1.2
0.0085	0.006	0.011	R00081	Ferrocytochrome-c:oxygen oxidoreductase	Oxygen + 4 Ferrocytochrome c <=> 4 Ferricytochrome c + 2 H2O		1.9.3.1
0.0085	0.005	0.012	R00028	alpha-D-Glucoside glucohydrolase	Maltose + H2O <=> 2 alpha-D-Glucose	Starch and sucrose metabolism	3.2.1.20
0.0085	0.002	0.015	R07147	D-glucose:NADP+ 1-oxidoreductase	D-Glucose + NADP+ <=> D-Glucono-1,5-lactone + NADPH + H+		1.1.1.119
0.0085	0.002	0.015	R00961	IDP diphosphohydrolase	IDP + H2O <=> IMP + Orthophosphate	Purine metabolism	3.6.1.5 3.6.1.6
0.0085	0.002	0.015	R00648	L-Methionine:oxygen oxidoreductase (deaminating)	L-Methionine + H2O + Oxygen <=> 4-Methylthio-2-oxobutanoic acid + NH3 + H2O2	Methionine metabolism	1.4.3.2
0.0085	0	0.017	R07410	L-aspartate:NAD+ oxidoreductase (deaminating)	L-Aspartate + NAD+ <=> Iminoaspartate + NADH + H+	Nicotinate and nicotinamide metabolism	1.4.1.21
0.008	0.016	0	R03134	O3-acetyl-L-serine:pyrazole 1-(2-amino-2-carboxyethyl)transferase	O-Acetyl-L-serine + Pyrazole <=> 3-(Pyrazol-1-yl)-L-alanine + Acetate		2.5.1.51
0.008	0.016	0	R02378	L-Serine hydro-lyase (adding pyrazole)	L-Serine + Pyrazole <=> 3-(Pyrazol-1-yl)-L-alanine + H2O		4.2.1.50
0.008	0.016	0	EC281	Malate dehydrogenase (ubiquinone 8 as acceptor)	[c]mal-L + q8 --> oaa + q8h2	Citrate Cycle (TCA)	EC-1.1.99.16
0.008	0.014	0.002	R00719	ITP diphosphohydrolase	ITP + H2O <=> IDP + Orthophosphate	Purine metabolism	3.6.1.5
0.008	0.011	0.005	R00684	L-Tryptophan:2-oxoglutarate aminotransferase	L-Tryptophan + 2-Oxoglutarate <=> Indolepyruvate + L-Glutamate	Tryptophan metabolism	2.6.1.27
0.008	0.009	0.007	R01558	Oxalate:CoA ligase (AMP-forming)	ATP + Oxalate + CoA <=> AMP + Pyrophosphate + Oxalyl-CoA	Glyoxylate and dicarboxylate metabolism	6.2.1.8
0.008	0.009	0.007	R00678	L-tryptophan:oxygen 2,3-oxidoreductase (decyclizing)	L-Tryptophan + Oxygen <=> L-Formylkynurenine	Tryptophan metabolism	1.13.11.11 1.13.11.52
0.008	0.007	0.009	EC016	alcohol dehydrogenase (glycerol)	[c]glyald + h + nadh <==> glyc + nad	Alternate Carbon Metabolism	EC-1.1.1.1
0.008	0.006	0.01	R02034	6-Phospho-D-gluconate:NADP+ 2-oxidoreductase	6-Phospho-D-gluconate + NADP+ <=> 6-Phospho-2-dehydro-D-gluconate + NADPH + H+	Pentose phosphate pathway,Glutathione metabolism	1.1.1.43
0.008	0.005	0.011	R04095	3-Methylbutanoyl-CoA:(acceptor) 2,3-oxidoreductase	3-Methylbutanoyl-CoA + FAD <=> 3-Methylcrotonyl-CoA + FADH2	Valine, leucine and isoleucine degradation	1.3.99.3 1.3.99.10
0.008	0.004	0.012	R01600	ATP:D-glucose 6-phosphotransferase	ATP + beta-D-Glucose <=> ADP + beta-D-Glucose 6-phosphate	Glycolysis / Gluconeogenesis	2.7.1.1 2.7.1.2
0.008	0.004	0.012	R01059	ATP:D-glyceraldehyde 3-phosphotransferase	ATP + D-Glyceraldehyde <=> ADP + (2R)-2-Hydroxy-3-(phosphonooxy)-propanal	Fructose and mannose metabolism	2.7.1.28
0.008	0.003	0.013	R05723	leucocyanidin,2-oxoglutarate:oxygen oxidoreductase	Leucocyanidin + 2-Oxoglutarate + Oxygen <=> Taxifolin + Succinate + CO2 + H2O	Flavonoid biosynthesis	1.14.11.19
0.008	0.003	0.013	R03636	Leucocyanidin:NADP+ 4-oxidoreductase; cis-3,4-Leucopelargonidin:NADP+ 4-oxidoreductase	Leucocyanidin + NADP+ <=> Taxifolin + NADPH	Flavonoid biosynthesis	1.1.1.219
0.008	0.003	0.013	R00877	D-Mannose ketol-isomerase	D-Mannose <=> D-Fructose	Fructose and mannose metabolism	5.3.1.7
0.008	0.003	0.013	R00808	Sucrose:(acceptor) 3-oxidoreductase	Sucrose + Acceptor <=> 3-Ketosucrose + Reduced acceptor		1.1.99.13
0.008	0.003	0.013	R00807	Sucrose:(acceptor) 3-oxidoreductase	Sucrose + FAD <=> 3-Ketosucrose + FADH2	Starch and sucrose metabolism	1.1.99.13
0.008	0.002	0.014	EC598	purine-nucleoside phosphorylase (Deoxyinosine)	[c]din + pi <==> 2dr1p + hxan	Nucleotide Salvage Pathways	EC-2.4.2.1
0.008	0.002	0.014	EC523	Deoxyadenosine deaminase	[c]dad-2 + h + h2o --> din + nh4	Nucleotide Salvage Pathways
0.008	0	0.016	R00491	L-Aspartate racemase	L-Aspartate <=> D-Aspartate	Alanine and aspartate metabolism	5.1.1.13
0.008	0	0.016	R00359	D-Aspartate:oxygen oxidoreductase (deaminating)	D-Aspartate + H2O + Oxygen <=> Oxaloacetate + NH3 + H2O2	Alanine and aspartate metabolism	1.4.3.1 1.4.3.15
0.008	0	0.016	EC007	L-aspartase	[c]asp-L --> fum + nh4	Alanine and aspartate metabolism	EC-4.3.1.1
0.0075	0.015	0	EC048	Glycolate oxidase	[c]glyclt + q8 --> glx + q8h2	Alternate Carbon Metabolism
0.0075	0.012	0.003	R01399	Carbamoyl-phosphate:putrescine carbamoyltransferase	Carbamoyl phosphate + Putrescine <=> Orthophosphate + N-Carbamoylputrescine		2.1.3.6
0.0075	0.011	0.004	R00522	Oxalate carboxy-lyase	Oxalate <=> Formate + CO2	Glyoxylate and dicarboxylate metabolism	4.1.1.2
0.0075	0.004	0.011	R04096	3-Methylbutanoyl-CoA:(acceptor) oxidoreductase	3-Methylbutanoyl-CoA + Acceptor <=> 3-Methylcrotonyl-CoA + Reduced acceptor		1.3.99.10
0.0075	0.002	0.013	R01278	trans-Hexadec-2-enoyl-CoA reductase	Palmitoyl-CoA + NADP+ <=> trans-Hexadec-2-enoyl-CoA + NADPH + H+	Fatty acid elongation in mitochondria	1.3.1.38
0.0075	0.001	0.014	R01296	4-hydroxybenzoate,NAD(P)H:oxygen oxidoreductase (3-hydroxylating)	4-Hydroxybenzoate + Oxygen + NADH + H+ <=> 3,4-Dihydroxybenzoate + NAD+ + H2O	Benzoate degradation via hydroxylation,2,4-Dichlorobenzoate degradation	1.14.13.33
0.007	0.014	0	EC580	thymidine kinase (ATP:thymidine)	[c]atp + thymd --> adp + dtmp + h	Nucleotide Salvage Pathways	EC-2.7.1.21
0.007	0.013	0.001	EC451	fructose-bisphosphatase	[c]fdp + h2o --> f6p + pi	Glycolysis/Gluconeogenesis	EC-3.1.3.11
0.007	0.013	0.001	EC280	malate dehydrogenase	[c]mal-L + nad <==> h + nadh + oaa	Citrate Cycle (TCA)	EC-1.1.1.37
0.007	0.013	0.001	EC090	mannitol-1-phosphate 5-dehydrogenase	[c]mnl1p + nad <==> f6p + h + nadh	Alternate Carbon Metabolism	EC-1.1.1.17
0.007	0.012	0.002	R00360	(S)-Malate:oxygen oxidoreductase	(S)-Malate + Oxygen <=> Oxaloacetate + H2O2	Pyruvate metabolism	1.1.3.3
0.007	0.012	0.002	EC131	Hydroxypyruvate reductase (NADPH)	[c]h + hpyr + nadph --> glyc-R + nadp	Alternate Carbon Metabolism
0.007	0.011	0.003	EC130	Hydroxypyruvate reductase (NADH)	[c]h + hpyr + nadh --> glyc-R + nad	Alternate Carbon Metabolism
0.007	0.008	0.006	R05724	nitric oxide, NAD(P)H2:oxygen oxidoreductase	2 Nitric oxide + 2 Oxygen + NADH + H+ <=> 2 Nitrate + NAD+		1.14.12.17
0.007	0.008	0.006	R01253	L-proline:(acceptor) oxidoreductase	L-Proline + Acceptor <=> (S)-1-Pyrroline-5-carboxylate + Reduced acceptor	Arginine and proline metabolism	1.5.99.8
0.007	0.007	0.007	R01695	L-Sorbose:oxygen 5-oxidoreductase	L-Sorbose + Oxygen <=> 5-Dehydro-D-fructose + H2O2		1.1.3.11
0.007	0.007	0.007	EC466	glyoxalate carboligase	[c](2) glx + h --> 2h3oppan + co2	Glyoxylate Metabolism	EC-4.1.1.47
0.007	0.006	0.008	EC590	5'-nucleotidase (dGMP)	[c]dgmp + h2o --> dgsn + pi	Nucleotide Salvage Pathways	EC-3.1.3.5
0.007	0.005	0.009	R00655	L-Methionine racemase	L-Methionine <=> D-Methionine		5.1.1.2
0.007	0.004	0.01	R01601	D-Glucose 6-sulfate sulfohydrolase	D-Glucose 6-sulfate + H2O <=> beta-D-Glucose + Sulfate	Glycolysis / Gluconeogenesis	3.1.6.3
0.007	0.004	0.01	R00233	Malonyl-CoA carboxy-lyase	Malonyl-CoA <=> Acetyl-CoA + CO2	beta-Alanine metabolism,Propanoate metabolism	4.1.1.9
0.007	0.003	0.011	R00090	NADH:hydrogen-peroxide oxidoreductase	H2O2 + NADH + H+ <=> NAD+ + 2 H2O		1.11.1.1
0.007	0.002	0.012	R07172	NADPH:oxygen oxidoreductase	NADPH + H+ + Oxygen <=> NADP+ + H2O2		1.6.3.1
0.007	0.002	0.012	R02332	dUTP:uridine 5\'-phosphotransferase	dUTP + Uridine <=> dUDP + UMP	Pyrimidine metabolism	2.7.1.48
0.0065	0.012	0.001	EC625	glycerol-3-phosphate dehydrogenase (ubiquinone-8)	[c]glyc3p + q8 --> dhap + q8h2	Oxidative phosphorylation	EC-1.1.99.5
0.0065	0.011	0.002	EC639	pyruvate oxidase	[c]h2o + pyr + q8 --> ac + co2 + q8h2	Oxidative phosphorylation	EC-1.2.2.2
0.0065	0.007	0.006	R01557	Maltose alpha-D-glucosylmutase	Maltose <=> alpha,alpha-Trehalose	Starch and sucrose metabolism	5.4.99.16
0.0065	0.005	0.008	R07394		2-Hydroxy-3-keto-5-methylthiopentenyl-1-phosphate + H2O <=> 1,2-Dihydroxy-5-(methylthio)pent-1-en-3-one + Orthophosphate	Methionine metabolism	3.1.3.77
0.0065	0.005	0.008	R07393		2,3-Diketo-5-methylthiopentyl-1-phosphate <=> 2-Hydroxy-3-keto-5-methylthiopentenyl-1-phosphate	Methionine metabolism	3.1.3.77
0.0065	0.005	0.008	R03169	2-methyl-branched-chain-acyl-CoA:NAD+ 2-oxidoreductase	2-Methylbutanoyl-CoA + NAD+ <=> 2-Methylbut-2-enoyl-CoA + NADH + H+		1.3.1.52
0.0065	0.004	0.009	R03920	ATP:D-fructose 6-phosphotransferase	ATP + beta-D-Fructose <=> ADP + beta-D-Fructose 6-phosphate	Starch and sucrose metabolism	2.7.1.1 2.7.1.4
0.0065	0.004	0.009	R00272	2-Oxoglutarate carboxy-lyase	2-Oxoglutarate <=> Succinate semialdehyde + CO2		4.1.1.71
0.0065	0.004	0.009	R00217	Oxaloacetate carboxy-lyase	Oxaloacetate <=> Pyruvate + CO2	Pyruvate metabolism	4.1.1.3
0.0065	0.003	0.01	R03990	Tetradecanoyl-CoA:(acceptor) 2,3-oxidoreductase	Tetradecanoyl-CoA + FAD <=> trans-Tetradec-2-enoyl-CoA + FADH2	Fatty acid metabolism	1.3.3.6 1.3.99.3 1.3.99.13 1.3.99.-
0.0065	0.003	0.01	R03989	trans-Tetradec-2-enoyl-CoA reductase	Tetradecanoyl-CoA + NADP+ <=> trans-Tetradec-2-enoyl-CoA + NADPH + H+	Fatty acid elongation in mitochondria	1.3.1.38
0.0065	0.003	0.01	R00803	Sucrose:orthophosphate alpha-D-glucosyltransferase	Sucrose + Orthophosphate <=> D-Fructose + D-Glucose 1-phosphate	Starch and sucrose metabolism	2.4.1.7
0.0065	0.002	0.011	R00406		Succinyl-CoA + (S)-Malate <=> Succinate + (3S)-3-Carboxy-3-hydroxypropanoyl-CoA
0.0065	0.001	0.012	EC175	4-aminobutyrate transaminase	[c]4abut + akg --> glu-L + sucsal	Arginine and Proline Metabolism	EC-2.6.1.19
0.0065	0	0.013	R01245	Adenosine ribohydrolase	Adenosine + H2O <=> Adenine + D-Ribose	Purine metabolism	3.2.2.1 3.2.2.7 3.2.2.8
0.006	0.011	0.001	EC042	UDPglucose 4-epimerase	[c]udpg <==> udpgal	Alternate Carbon Metabolism	EC-5.1.3.2
0.006	0.01	0.002	R01874	D-Cysteine sulfide-lyase (deaminating)	D-Cysteine + H2O <=> Hydrogen sulfide + NH3 + Pyruvate	Cysteine metabolism	4.4.1.15
0.006	0.01	0.002	R00903	L-2-Amino-3-mercaptopropionic acid racemase	L-Cysteine <=> D-Cysteine	Cysteine metabolism	5.1.1.10
0.006	0.01	0.002	R00581	L-serine:NAD+ oxidoreductase (deaminating)	L-Serine + NAD+ + H2O <=> Hydroxypyruvate + NH3 + NADH + H+		1.4.1.7
0.006	0.01	0.002	EC051	Glycerol dehydrogenase	[c]glyc + nad --> dha + h + nadh	Alternate Carbon Metabolism	EC-1.1.1.6
0.006	0.007	0.005	R05725	nitric oxide, NADPH2:oxygen oxidoreductase	2 Nitric oxide + 2 Oxygen + NADPH + H+ <=> 2 Nitrate + NADP+		1.14.12.17
0.006	0.006	0.006	R06846	L-quinate:NADP+ 3-oxidoreductase	Quinate + NADP+ <=> 3-Dehydroquinate + NADPH + H+		1.1.1.282
0.006	0.006	0.006	R01696	L-Sorbose:(acceptor) 5-oxidoreductase	L-Sorbose + Acceptor <=> 5-Dehydro-D-fructose + Reduced acceptor		1.1.99.12
0.006	0.005	0.007	R00628	Acetic-ester acetylhydrolase	Acetic ester + H2O <=> Alcohol + Acetate		3.1.1.6
0.006	0.005	0.007	R00627	Acetyl-CoA:alcohol O-acetyltransferase	Acetyl-CoA + Alcohol <=> CoA + Acetic ester		2.3.1.84
0.006	0.005	0.007	EC593	5'-nucleotidase (AMP)	[c]amp + h2o --> adn + pi	Nucleotide Salvage Pathways	EC-3.1.3.5
0.006	0.003	0.009	R01697	D-Sorbitol:(acceptor) 1-oxidoreductase	D-Sorbitol + Acceptor <=> L-Sorbose + Reduced acceptor		1.1.99.21
0.006	0.003	0.009	R00873	D-Fructose:(acceptor) 5-oxidoreductase	D-Fructose + Acceptor <=> 5-Dehydro-D-fructose + Reduced acceptor		1.1.99.11
0.006	0.003	0.009	EC152	succinate-semialdehyde dehydrogenase (NAD)	[c]h2o + nad + sucsal --> (2) h + nadh + succ	Arginine and Proline Metabolism	EC-1.2.1.16
0.006	0.002	0.01	R07346	D-glucitol:NADP+ oxidoreductase	D-Sorbitol + NADP+ <=> L-Sorbose + NADPH + H+		1.1.1.289
0.006	0.001	0.011	R04754	Decanoyl-CoA:(acceptor) 2,3-oxidoreductase	Decanoyl-CoA + FAD <=> trans-Dec-2-enoyl-CoA + FADH2	Fatty acid metabolism	1.3.3.6 1.3.99.3 1.3.99.13 1.3.99.-
0.006	0.001	0.011	R04753	trans-Dec-2-enoyl-CoA reductase	Decanoyl-CoA + NADP+ <=> trans-Dec-2-enoyl-CoA + NADPH + H+	Fatty acid elongation in mitochondria	1.3.1.38
0.006	0.001	0.011	EC522	Adenosine deaminase	[c]adn + h + h2o --> ins + nh4	Nucleotide Salvage Pathways	EC-3.5.4.4
0.006	0	0.012	R00720	Inosine 5\'-triphosphate pyrophosphohydrolase	ITP + H2O <=> IMP + Pyrophosphate	Purine metabolism	3.6.1.8 3.6.1.19
0.006	0	0.012	R00567	L-Arginine racemase	L-Arginine <=> D-Arginine	D-Arginine and D-ornithine metabolism	5.1.1.9
0.0055	0.011	0	R01267	L-Asparagine hydro-lyase	L-Asparagine <=> 3-Cyano-L-alanine + H2O	Cyanoamino acid metabolism	4.2.1.65
0.0055	0.009	0.002	R00503	UDPgalactose:D-glucose 4-beta-D-galactosyltransferase	UDP-D-galactose + D-Glucose <=> UDP + Lactose	Galactose metabolism	2.4.1.22
0.0055	0.008	0.003	R02457	D-Ornithine:oxygen oxidoreductase (deaminating)	D-Ornithine + H2O + Oxygen <=> 5-Amino-2-oxopentanoic acid + NH3 + H2O2	D-Arginine and D-ornithine metabolism	1.4.3.3
0.0055	0.007	0.004	R00335	GTP phosphohydrolase (vesicle-releasing)	GTP + H2O <=> GDP + Orthophosphate	Purine metabolism	3.6.1.5 3.6.5.1 3.6.5.2 3.6.5.3 3.6.5.4 3.6.5.5 3.6.5.6
0.0055	0.006	0.005	R01564	N,N-Dimethylglycine:oxygen oxidoreductase (demethylating)	N,N-Dimethylglycine + H2O + Oxygen <=> Sarcosine + Formaldehyde + H2O2		1.5.3.10
0.0055	0.005	0.006	R02167	D-Mannitol-1-phosphate phosphohydrolase	D-Mannitol 1-phosphate + H2O <=> Mannitol + Orthophosphate	Fructose and mannose metabolism	3.1.3.22
0.0055	0.005	0.006	R01694	L-Sorbose:NADP+ 5-oxidoreductase	L-Sorbose + NADP+ <=> 5-Dehydro-D-fructose + NADPH + H+		1.1.1.123
0.0055	0.005	0.006	R01374	D-phenylalanine:(acceptor) oxidoreductase (deaminating)	D-Phenylalanine + H2O + Acceptor <=> Phenylpyruvate + NH3 + Reduced acceptor	Phenylalanine metabolism	1.4.99.1
0.0055	0.005	0.006	R00468	Glyoxylate:NADP+ oxidoreductase (CoA-oxalylating)	Glyoxylate + CoA + NADP+ <=> Oxalyl-CoA + NADPH + H+	Glyoxylate and dicarboxylate metabolism	1.2.1.17
0.0055	0.004	0.007	R02736	beta-D-Glucose-6-phosphate:NADP+ 1-oxoreductase	beta-D-Glucose 6-phosphate + NADP+ <=> D-Glucono-1,5-lactone 6-phosphate + NADPH + H+	Pentose phosphate pathway,Glutathione metabolism	1.1.1.49
0.0055	0.004	0.007	R01022	Choline:oxygen 1-oxidoreductase	Choline + Oxygen <=> Betaine aldehyde + H2O2		1.1.3.17
0.0055	0.001	0.01	EC174	succinate-semialdehyde dehydrogenase (NADP)	[c]h2o + nadp + sucsal --> (2) h + nadph + succ	Arginine and Proline Metabolism	EC-1.2.1.16
0.0055	0	0.011	R02137	Cytidine ribohydrolase	Cytidine + H2O <=> Cytosine + D-Ribose	Pyrimidine metabolism	3.2.2.8
0.0055	0	0.011	R01238	4-Hydroxybenzoate carboxy-lyase	4-Hydroxybenzoate <=> Phenol + CO2	Benzoate degradation via CoA ligation	4.1.1.61
0.005	0.01	0	R00731	L-Tyrosine:oxygen oxidoreductase	L-Tyrosine + Oxygen <=> 3,4-Dihydroxy-L-phenylalanine + H2O	Tyrosine metabolism	1.14.18.1
0.005	0.01	0	R00589	L-2-Amino-3-hydroxypropionic acid racemase	L-Serine <=> D-Serine	Glycine, serine and threonine metabolism	5.1.1.10
0.005	0.01	0	EC618	Trimethylamine N-oxide reductase (menaquinol 8)	[c]h + mql8 + tmao --> h2o + mqn8 + tma	Oxidative phosphorylation
0.005	0.01	0	EC439	D-serine deaminase	[c]ser-D --> nh4 + pyr	Glycine and Serine Metabolism
0.005	0.007	0.003	R03121	Aromatic-amino-acid:glyoxylate aminotransferase	Aromatic amino acid + Glyoxylate <=> Aromatic oxo acid + Glycine		2.6.1.60
0.005	0.007	0.003	R03120	Aromatic-amino-acid:2-oxoglutarate aminotransferase	Aromatic amino acid + 2-Oxoglutarate <=> Aromatic oxo acid + L-Glutamate		2.6.1.57
0.005	0.007	0.003	R02559	NADH:trimethylamine-N-oxide oxidoreductase	Trimethylamine + NAD+ + H2O <=> Trimethylamine N-oxide + NADH + H+		1.6.6.9
0.005	0.007	0.003	R00227	Acetyl-CoA hydrolase	Acetyl-CoA + H2O <=> CoA + Acetate	Pyruvate metabolism	3.1.2.1
0.005	0.005	0.005	R03936	Formylkynurenine hydrolase	L-Formylkynurenine + H2O <=> Formylanthranilate + L-Alanine	Tryptophan metabolism	3.7.1.3
0.005	0.005	0.005	R02161	Ubiquinol:ferricytochrome-c oxidoreductase	Ubiquinol + 2 Ferricytochrome c <=> Ubiquinone + 2 Ferrocytochrome c		1.10.2.2
0.005	0.005	0.005	R00988	N-Formylanthranilate amidohydrolase	Formylanthranilate + H2O <=> Formate + Anthranilate	Tryptophan metabolism	3.5.1.9
0.005	0.005	0.005	R00407	Succinyl-CoA hydrolase	Succinyl-CoA + H2O <=> CoA + Succinate	Citrate cycle (TCA cycle)	3.1.2.3
0.005	0.003	0.007	R05563	Biuret amidohydrolase	Biuret + H2O <=> Urea-1-carboxylate + NH3	Atrazine degradation	3.5.1.84
0.005	0.003	0.007	R05562	Biuret amidohydrolase	Biuret + H2O <=> Urea + CO2 + NH3	Atrazine degradation	3.5.1.84
0.005	0.003	0.007	R03291	trans-4-Hydroxy-L-proline:NAD+ 5-oxidoreductase	trans-4-Hydroxy-L-proline + NAD+ <=> L-1-Pyrroline-3-hydroxy-5-carboxylate + NADH + H+	Arginine and proline metabolism	1.5.1.2
0.005	0.003	0.007	R01277	hexadecanal:NAD+ oxidoreductase (CoA-acylating)	Hexadecanal + CoA + NAD+ <=> Palmitoyl-CoA + NADH + H+		1.2.1.42
0.005	0.003	0.007	R00774	Urea:carbon-dioxide ligase (ADP-forming)	ATP + Urea + HCO3- <=> ADP + Orthophosphate + Urea-1-carboxylate	Urea cycle and metabolism of amino groups	6.3.4.6
0.005	0.003	0.007	R00146		alpha-Amino acid + H2O + NADP+ <=> 2-Oxo acid + NH3 + NADPH + H+	Nitrogen metabolism	1.4.1.1 1.4.1.2 1.4.1.3 1.4.1.4 1.4.1.5 1.4.1.7 1.4.1.8 1.4.1.9 1.4.1.10 1.4.1.12 1.4.1.15 1.4.1.19 1.4.1.20
0.005	0.002	0.008	R06124		alpha-Amino acid + H2O + Oxygen <=> 2-Oxo acid + NH3 + H2O2	Nitrogen metabolism	1.4.3.1 1.4.3.2 1.4.3.3 1.4.3.7 1.4.3.11
0.005	0.002	0.008	R05882	UDP-glucose:vomilenine 21-O-beta-D-glucosyltransferase	UDP-glucose + Vomilenine <=> UDP + Raucaffricine	Indole and ipecac alkaloid biosynthesis	2.4.1.219
0.005	0.002	0.008	R03703	Raucaffricine beta-D-glucohydrolase	Raucaffricine + H2O <=> Vomilenine + D-Glucose	Indole and ipecac alkaloid biosynthesis	3.2.1.125
0.005	0.002	0.008	R00801	alpha-D-Glucoside glucohydrolase	Sucrose + H2O <=> D-Fructose + D-Glucose	Galactose metabolism	3.2.1.20
0.005	0.001	0.009	R02089	ATP:deoxyadenosine 5\'-phosphotransferase	ATP + Deoxyadenosine <=> ADP + dAMP	Purine metabolism	2.7.1.76
0.005	0.001	0.009	R01357	Acetoacetate:CoA ligase (AMP-forming)	ATP + Acetoacetate + CoA <=> AMP + Pyrophosphate + Acetoacetyl-CoA	Butanoate metabolism	6.2.1.16
0.005	0.001	0.009	R00868	D-Mannitol:NAD+ 2-oxidoreductase	Mannitol + NAD+ <=> D-Fructose + NADH + H+	Fructose and mannose metabolism	1.1.1.11 1.1.1.67
0.005	0	0.01	R02458	D-Arginine amidinohydrolase	D-Arginine + H2O <=> D-Ornithine + Urea	D-Arginine and D-ornithine metabolism	3.5.3.10
0.005	0	0.01	R02323	Nicotinamide ribonucleotide phosphohydrolase	Nicotinamide D-ribonucleotide + H2O <=> N-Ribosylnicotinamide + Orthophosphate	Nicotinate and nicotinamide metabolism	3.1.3.5
0.0045	0.009	0	R01450		(S)-Lactate <=> (R)-Lactate	Pyruvate metabolism	5.1.2.1
0.0045	0.009	0	R00528	Sulfite:ferricytochrome-c oxidoreductase	Sulfite + H2O + 2 Ferricytochrome c <=> Sulfate + 2 Ferrocytochrome c	Sulfur metabolism	1.8.2.1
0.0045	0.009	0	R00031	1,2-Benzenediol:oxygen oxidoreductase	Oxygen + 2 L-Tyrosine <=> 2 3,4-Dihydroxy-L-phenylalanine	Tyrosine metabolism	1.10.3.1
0.0045	0.009	0	EC555	Nucleoside triphosphate pyrophosphorylase (ctp)	[c]ctp + h2o --> cmp + h + ppi	Nucleotide Salvage Pathways
0.0045	0.006	0.003	R00766	UDPglucose:D-fructose-6-phosphate 2-alpha-D-glucosyltransferase	UDP-glucose + D-Fructose 6-phosphate <=> UDP + Sucrose 6-phosphate	Starch and sucrose metabolism	2.4.1.14
0.0045	0.006	0.003	EC095	trehalose-phosphatase	[c]h2o + tre6p --> pi + tre	Alternate Carbon Metabolism	EC-3.1.3.12
0.0045	0.006	0.003	EC094	alpha,alpha-trehalose-phosphate synthase (UDP-forming)	[c]g6p + udpg --> h + tre6p + udp	Alternate Carbon Metabolism	EC-2.4.1.15
0.0045	0.005	0.004	R07265	alpha,alpha-trehalose:phosphate alpha-D-glucosyltransferase	alpha,alpha-Trehalose + Orthophosphate <=> alpha-D-Glucose + D-Glucose 1-phosphate		2.4.1.231
0.0045	0.005	0.004	R02032	6-Phospho-2-dehydro-D-gluconate:NAD+ 2-oxidoreductase	6-Phospho-D-gluconate + NAD+ <=> 6-Phospho-2-dehydro-D-gluconate + NADH + H+	Pentose phosphate pathway	1.1.1.43
0.0045	0.004	0.005	R01498	D-Glucosyl-N-acylsphingosine glucohydrolase	Glucosylceramide + H2O <=> D-Glucose + N-Acylsphingosine	Sphingolipid metabolism	3.2.1.45
0.0045	0.004	0.005	R01497	UDPglucose:N-acylsphingosine D-glucosyltransferase	UDP-glucose + N-Acylsphingosine <=> UDP + Glucosylceramide	Sphingolipid metabolism	2.4.1.80
0.0045	0.004	0.005	R00870	D-Mannitol:NADP+ 2-oxidoreductase	Mannitol + NADP+ <=> D-Fructose + NADPH + H+	Fructose and mannose metabolism	1.1.1.138
0.0045	0.003	0.006	R06620	D-glucose:ubiquinone oxidoreductase	D-Glucose + Ubiquinone <=> D-Glucono-1,5-lactone + Ubiquinol	Pentose phosphate pathway	1.1.5.2
0.0045	0.003	0.006	R00802	alpha-D-Glucoside glucohydrolase	Sucrose + H2O <=> beta-D-Fructose + alpha-D-Glucose	Starch and sucrose metabolism	3.2.1.20 3.2.1.26 3.2.1.48
0.0045	0.003	0.006	R00637	Primary alcohol:oxygen oxidereductase	Primary alcohol + Oxygen <=> Aldehyde + H2O2		1.1.3.13
0.0045	0.002	0.007	R01704	Palmitaldehyde:NAD+ oxidoreductase	Hexadecanal + NAD+ + H2O <=> Hexadecanoic acid + NADH + H+	Fatty acid metabolism	1.2.1.48
0.0045	0.002	0.007	R01280	Palmitate:CoA ligase (AMP-forming)	ATP + Hexadecanoic acid + CoA <=> AMP + Palmitoyl-CoA + Pyrophosphate	Fatty acid metabolism	6.2.1.3
0.0045	0.002	0.007	R00319	(S)-Lactate:oxygen 2-oxidoreductase(decarboxylating)	(S)-Lactate + Oxygen <=> Acetate + CO2 + H2O	Pyruvate metabolism	1.13.12.4
0.0045	0.001	0.008	R02630	Protein-N(pai)-phosphohistidine:sugar N(pai)-phosphotransferase	Protein N(pi)-phospho-L-histidine + D-Mannose <=> Protein histidine + D-Mannose 6-phosphate	Fructose and mannose metabolism	2.7.1.69
0.0045	0.001	0.008	R02595	Coniferin beta-D-glucosidase	Coniferin + H2O <=> Coniferyl alcohol + D-Glucose	Stilbene, coumarine and lignin biosynthesis	3.2.1.126
0.0045	0.001	0.008	R02594	UDPglucose:coniferyl-alcohol 4\'-beta-D-glucosyltransferase	UDP-glucose + Coniferyl alcohol <=> UDP + Coniferin	Stilbene, coumarine and lignin biosynthesis	2.4.1.111
0.0045	0	0.009	R05280		3,4-Dihydroxybenzoate + NH3 <=> 4-Aminobenzoate + Oxygen + 2 H+	2,4-Dichlorobenzoate degradation	1.14.12.-
0.0045	0	0.009	R04006	4-Hydroxycinnamyl alcohol 4-D-glucoside beta-D-glucosidase	4-Hydroxycinnamyl alcohol 4-D-glucoside + H2O <=> 4-Coumaryl alcohol + D-Glucose	Stilbene, coumarine and lignin biosynthesis	3.2.1.126
0.0045	0	0.009	R04005	UDPglucose:coniferyl-alcohol 4\'-beta-D-glucosyltransferase	UDP-glucose + 4-Coumaryl alcohol <=> UDP + 4-Hydroxycinnamyl alcohol 4-D-glucoside	Stilbene, coumarine and lignin biosynthesis	2.4.1.111
0.0045	0	0.009	R03605	UDPglucose:coniferyl-alcohol 4\'-beta-D-glucosyltransferase	UDP-glucose + Sinapyl alcohol <=> UDP + Syringin	Stilbene, coumarine and lignin biosynthesis	2.4.1.111
0.0045	0	0.009	R03604	Syringin beta-D-glucosidase	Syringin + H2O <=> Sinapyl alcohol + D-Glucose	Stilbene, coumarine and lignin biosynthesis	3.2.1.126
0.0045	0	0.009	R00822	Protocatechuate carboxy-lyase	3,4-Dihydroxybenzoate <=> Catechol + CO2	Benzoate degradation via hydroxylation	4.1.1.63
0.004	0.008	0	R04859	O3-Acetyl-L-serine acetate-lyase (adding hydrogen sulfide)	O-Acetyl-L-serine + Thiosulfate + Thioredoxin + H+ <=> L-Cysteine + Sulfite + Oxidized thioredoxin + Acetate	Cysteine metabolism	2.5.1.47 2.5.1.49
0.004	0.008	0	R03050	2-Acetolactate pyruvate-lyase (carboxylating)	2-Acetolactate + Thiamin diphosphate <=> 2-(alpha-Hydroxyethyl)thiamine diphosphate + Pyruvate	Butanoate metabolism	2.2.1.6
0.004	0.008	0	R00486	3-Cyano-L-alanine aminohydrolase	3-Cyano-L-alanine + 2 H2O <=> L-Aspartate + NH3	Cyanoamino acid metabolism	3.5.5.4
0.004	0.007	0.001	R03139	1,3-Diaminopropane:oxygen oxidoreductase (deaminating) (copper-containing)	1,3-Diaminopropane + Oxygen + H2O <=> beta-Aminopropion aldehyde + NH3 + H2O2	beta-Alanine metabolism	1.4.3.6
0.004	0.007	0.001	R00904	beta-Aminopropion aldehyde:NAD+ oxidoreductase	beta-Aminopropion aldehyde + NAD+ + H2O <=> beta-Alanine + NADH	beta-Alanine metabolism	1.2.1.3
0.004	0.006	0.002	R07243	S-adenosyl-L-methionine:sarcosine N-methyltransferase	S-Adenosyl-L-methionine + Sarcosine <=> S-Adenosyl-L-homocysteine + N,N-Dimethylglycine		2.1.1.156 2.1.1.157
0.004	0.006	0.002	R05623		Trimethylamine + NADH + H+ + Oxygen <=> Trimethylamine N-oxide + NAD+ + H2O	Methane metabolism	1.14.13.-
0.004	0.006	0.002	R00508	3\'-Phospho-5\'-adenylyl sulfate 3\'(2\')-phosphohydrolase	3\'-Phosphoadenylyl sulfate + H2O <=> Adenylylsulfate + Orthophosphate	Sulfur metabolism	3.1.3.7
0.004	0.006	0.002	EC465	tartronate semialdehyde reductase	[c]2h3oppan + h + nadh --> glyc-R + nad	Glyoxylate Metabolism	EC-1.1.1.60
0.004	0.005	0.003	R07182	hydrogen:(acceptor) oxidoreductase	Hydrogen + Acceptor <=> Reduced acceptor		1.12.99.6
0.004	0.004	0.004	R03293	trans-4-Hydroxy-L-proline:NADP+ 5-oxidoreductase	trans-4-Hydroxy-L-proline + NADP+ <=> L-1-Pyrroline-3-hydroxy-5-carboxylate + NADPH + H+	Arginine and proline metabolism	1.5.1.2
0.004	0.004	0.004	R02569	Acetyl-CoA:dihydrolipoamide S-acetyltransferase	Acetyl-CoA + Dihydrolipoamide <=> CoA + S-Acetyldihydrolipoamide	Glycolysis / Gluconeogenesis	2.3.1.12
0.004	0.003	0.005	R06985	trans-Hex-2-enoyl-CoA reductase	trans-Hex-2-enoyl-CoA + NADPH + H+ <=> Hexanoyl-CoA + NADP+	Fatty acid elongation in mitochondria	1.3.1.38
0.004	0.003	0.005	R04751	Hexanoyl-CoA:(acceptor) 2,3-oxidoreductase	Hexanoyl-CoA + FAD <=> trans-Hex-2-enoyl-CoA + FADH2	Fatty acid metabolism	1.3.3.6 1.3.99.2 1.3.99.3 1.3.99.13 1.3.99.-
0.004	0.003	0.005	R01747	(R)-Glycerate:NADP+ oxidoreductase	D-Glycerate + NADP+ <=> 2-Hydroxy-3-oxopropanoate + NADPH + H+	Glyoxylate and dicarboxylate metabolism	1.1.1.60
0.004	0.002	0.006	R02163	NADH:ubiquinone oxidoreductase	Ubiquinol + NAD+ <=> Ubiquinone + NADH + H+		1.6.5.3
0.004	0.002	0.006	R01962		D-Glucosamine + Oxygen + H2O <=> 2-Amino-2-deoxy-D-gluconate + H2O2	Aminosugars metabolism
0.004	0.002	0.006	R01544	2-amino-2-deoxy-D-gluconate ammonia-lyase; D-Glucosaminate ammonia-lyase (isomerizing)	2-Amino-2-deoxy-D-gluconate <=> 2-Dehydro-3-deoxy-D-gluconate + NH3	Pentose phosphate pathway	4.3.1.9
0.004	0.002	0.006	R01041	Glycerol:NADP+ oxidoreductase	Glycerol + NADP+ <=> D-Glyceraldehyde + NADPH + H+	Glycerolipid metabolism	1.1.1.1 1.1.1.2 1.1.1.21 1.1.1.72
0.004	0.002	0.006	R00145		alpha-Amino acid + H2O + NAD+ <=> 2-Oxo acid + NH3 + NADH + H+	Nitrogen metabolism	1.4.1.1 1.4.1.2 1.4.1.3 1.4.1.4 1.4.1.5 1.4.1.7 1.4.1.8 1.4.1.9 1.4.1.10 1.4.1.12 1.4.1.15 1.4.1.19 1.4.1.20
0.004	0.001	0.007	R01273	N-Ribosylnicotinamide ribohydrolase	N-Ribosylnicotinamide + H2O <=> Nicotinamide + D-Ribose	Nicotinate and nicotinamide metabolism	3.2.2.1
0.004	0	0.008	R00102	NAD+ glycohydrolase	NAD+ + H2O <=> Nicotinamide + ADP-ribose	Nicotinate and nicotinamide metabolism	3.2.2.5 3.2.2.6
0.0035	0.007	0	R04269		L-threo-3-Methylaspartate + 2-Oxoglutarate <=> Methyloxaloacetate + L-Glutamate	C5-Branched dibasic acid metabolism
0.0035	0.007	0	R02260	(S)-Lactaldehyde:NADP+ oxidoreductase	(S)-Lactaldehyde + NADP+ <=> Methylglyoxal + NADPH + H+	Pyruvate metabolism	1.2.1.49
0.0035	0.007	0	R00995		2-Oxobutanoate + CO2 <=> Methyloxaloacetate	C5-Branched dibasic acid metabolism
0.0035	0.007	0	R00525	N-Formyl-L-glutamate amidohydrolase	N-Formyl-L-glutamate + H2O <=> Formate + L-Glutamate	Histidine metabolism,Glyoxylate and dicarboxylate metabolism	3.5.1.68
0.0035	0.007	0	R00262	L-threo-3-Methylaspartate carboxy-aminomethylmutase	L-threo-3-Methylaspartate <=> L-Glutamate	C5-Branched dibasic acid metabolism	5.4.99.1
0.0035	0.007	0	EC561	Nucleoside triphosphate pyrophosphorylase (gtp)	[c]gtp + h2o --> gmp + h + ppi	Nucleotide Salvage Pathways
0.0035	0.007	0	EC282	Malate dehydrogenase (menaquinone 8 as acceptor)	[c]mal-L + mqn8 --> mql8 + oaa	Citrate Cycle (TCA)	EC-1.1.99.16
0.0035	0.007	0	EC273	Citrate lyase	[c]cit --> ac + oaa	Citrate Cycle (TCA)	EC-4.1.3.6
0.0035	0.006	0.001	EC024	acetyl-CoA:acetoacetyl-CoA transferase	[c]acac + accoa --> aacoa + ac	Alternate Carbon Metabolism
0.0035	0.004	0.003	R07409	choline,reduced-ferredoxin:oxygen oxidoreductase	Choline + Oxygen + 2 Reduced ferredoxin + 2 H+ <=> Betaine aldehyde + 2 H2O + 2 Oxidized ferredoxin	Glycine, serine and threonine metabolism	1.14.15.7
0.0035	0.004	0.003	R07154	pyridoxine:(acceptor) 5-oxidoreductase	Pyridoxine + Acceptor <=> Isopyridoxal + Reduced acceptor		1.1.99.9
0.0035	0.004	0.003	R02560	NADH:trimethylamine-N-oxide oxidoreductase	Trimethylamine + FAD + H2O <=> FADH2 + Trimethylamine N-oxide	Methane metabolism	1.6.6.9
0.0035	0.004	0.003	R01910	Primary alcohol:(acceptor) oxidoreductase	Pyridoxine + Oxygen <=> Isopyridoxal + H2O2	Vitamin B6 metabolism	1.1.99.9
0.0035	0.004	0.003	R01346	L-Asparagine:2-oxo-acid aminotransferase	L-Asparagine + 2-Oxo acid <=> 2-Oxosuccinamate + L-Amino acid	Alanine and aspartate metabolism,Tetracycline biosynthesis	2.6.1.14
0.0035	0.004	0.003	R00608	Methanol:oxygen oxidereductase	Methanol + Oxygen <=> Formaldehyde + H2O2	Methane metabolism	1.1.3.13
0.0035	0.004	0.003	R00348	2-Oxosuccinamate amidohydrolase	2-Oxosuccinamate + H2O <=> Oxaloacetate + NH3	Alanine and aspartate metabolism	3.5.1.3
0.0035	0.004	0.003	EC583	uridine kinase (GTP:Uridine)	[c]gtp + uri --> gdp + h + ump	Nucleotide Salvage Pathways	EC-2.7.1.48
0.0035	0.004	0.003	EC544	Nucleoside triphosphate tripolyhydrolase	[c]dgtp + h2o --> dgsn + pppi	Nucleotide Salvage Pathways	EC-3.1.5.1
0.0035	0.002	0.005	R01054	ADPribose ribophosphohydrolase	ADP-ribose + H2O <=> AMP + D-Ribose 5-phosphate	Purine metabolism	3.6.1.13
0.0035	0.002	0.005	R00975	5,6-Dihydrouracil:oxygen oxidoreductase	5,6-Dihydrouracil + Oxygen <=> Uracil + H2O2		1.3.3.7
0.0035	0.001	0.006	R02319	NTP phosphohydrolase	Nucleoside triphosphate + H2O <=> NDP + Orthophosphate		3.6.1.15
0.0035	0.001	0.006	R01685	Taurine:ferricytochrome-c oxidoreductase (deaminating)	Taurine + H2O + 2 Ferricytochrome c <=> Sulfoacetaldehyde + NH3 + 2 Ferrocytochrome c	Taurine and hypotaurine metabolism,Nitrogen metabolism	1.4.2.-
0.0035	0.001	0.006	R00453	L-Lysine:pyruvate aminotransferase	L-Lysine + Pyruvate <=> L-2-Aminoadipate 6-semialdehyde + L-Alanine		2.6.1.71
0.003	0.006	0	R07139	lactaldehyde:NADP+ oxidoreductase	Lactaldehyde + NADP+ <=> Methylglyoxal + NADPH + H+		1.1.1.283
0.003	0.006	0	R03601	O3-Acetyl-L-serine acetate-lyase (adding hydrogen sulfide)	O-Acetyl-L-serine + Selenide <=> Selenocysteine + Acetate	Selenoamino acid metabolism	2.5.1.47
0.003	0.006	0	R03599	Selenocysteine reductase	Selenocysteine + Reduced acceptor <=> Selenide + L-Alanine + Acceptor	Selenoamino acid metabolism	4.4.1.16
0.003	0.006	0	R02198	L-Isoleucine:2-oxoglutarate aminotransferase	L-Isoleucine + 2-Oxoglutarate <=> 3-Methyl-2-oxopentanoate + L-Glutamate	Valine, leucine and isoleucine degradation	2.6.1.42
0.003	0.006	0	R02197	L-Isoleucine:oxygen oxidoreductase (deaminating)	L-Isoleucine + Oxygen + H2O <=> 3-Methyl-2-oxopentanoate + NH3 + H2O2	Valine, leucine and isoleucine degradation	1.4.3.2
0.003	0.006	0	R02166	NADH:ubiquinone oxidoreductase	Ubiquinol <=> Ubiquinone + 2 H+	Ubiquinone biosynthesis	1.6.5.3
0.003	0.006	0	R01342	D-Amino-acid:(acceptor) oxidoreductase (deaminating)	alpha-Amino acid + H2O + Acceptor <=> 2-Oxo acid + NH3 + Reduced acceptor	Nitrogen metabolism	1.4.99.1
0.003	0.006	0	EC624	glycerol-3-phosphate dehydrogenase (menaquinone-8)	[c]glyc3p + mqn8 --> dhap + mql8	Oxidative phosphorylation	EC-1.1.99.5
0.003	0.006	0	EC481	acetyl-CoA C-acetyltransferase	[c](2) accoa <==> aacoa + coa	Membrane Lipid Metabolism	EC-2.3.1.9
0.003	0.006	0	EC144	malic enzyme (NADP)	[c]mal-L + nadp --> co2 + nadph + pyr	Anaplerotic reactions	EC-1.1.1.40
0.003	0.005	0.001	R05112	Gal-beta1->3GalNAc-beta1->4Gal-beta1->4Glc-beta1->1\'Cer galactohydrolase	GA1 + H2O <=> GA2 + D-Galactose		3.2.1.23
0.003	0.005	0.001	R05111		UDP-D-galactose + GA2 <=> UDP + GA1		2.4.1.62
0.003	0.005	0.001	R01151	Putrescine:oxygen oxidoreductase (deaminating)	Putrescine + Oxygen + H2O <=> 4-Aminobutanal + NH3 + H2O2	Arginine and proline metabolism	1.4.3.6 1.4.3.10
0.003	0.005	0.001	R00500		2 Glutathione <=> Oxidized glutathione	Glutamate metabolism	1.8.4.-
0.003	0.004	0.002	R03915	Glutathione:protein-disulfide oxidoreductase	Protein dithiol + Oxidized glutathione <=> Protein disulfide + 2 Glutathione	Glutathione metabolism	1.8.4.2
0.003	0.004	0.002	R01959	N-Formyl-L-kynurenine amidohydrolase	L-Formylkynurenine + H2O <=> Formate + L-Kynurenine	Tryptophan metabolism,Glyoxylate and dicarboxylate metabolism	3.5.1.9
0.003	0.004	0.002	R00987	L-Kynurenine hydrolase	L-Kynurenine + H2O <=> Anthranilate + L-Alanine	Tryptophan metabolism	3.7.1.3
0.003	0.004	0.002	R00284	Ammonia:(acceptor) oxidoreductase	Acceptor + NH3 + H2O <=> Hydroxylamine + Reduced acceptor		1.7.99.1
0.003	0.003	0.003	R02631	Protein-N(pai)-phosphohistidine:sugar N(pai)-phosphotransferase	Protein N(pi)-phospho-L-histidine + D-Glucosamine <=> Protein histidine + D-Glucosamine 6-phosphate	Aminosugars metabolism	2.7.1.69
0.003	0.003	0.003	R01565	N,N-Dimethylglycine:(acceptor) oxidoreductase (demethylating)	N,N-Dimethylglycine + Acceptor + H2O <=> Sarcosine + Formaldehyde + Reduced acceptor	Glycine, serine and threonine metabolism	1.5.99.2
0.003	0.002	0.004	R04968	Tetradecanoyl-[acyl-carrier protein]:malonyl-[acyl-carrier-protein] C-acyltransferase (decarboxylating)	Tetradecanoyl-[acp] + Malonyl-[acyl-carrier protein] <=> 3-Oxohexadecanoyl-[acp] + CO2 + Acyl-carrier protein	Fatty acid biosynthesis	2.3.1.41 2.3.1.85 2.3.1.86
0.003	0.002	0.004	R04544	(3R)-3-Hydroxypalmitoyl-[acyl-carrier-protein] hydro-lyase	(3R)-3-Hydroxypalmitoyl-[acyl-carrier protein] <=> trans-Hexadec-2-enoyl-[acp] + H2O	Fatty acid biosynthesis	2.3.1.85 2.3.1.86 4.2.1.61
0.003	0.002	0.004	R04543	(3R)-3-Hydroxypalmitoyl-[acyl-carrier-protein]:NADP+ oxidoreductase	(3R)-3-Hydroxypalmitoyl-[acyl-carrier protein] + NADP+ <=> 3-Oxohexadecanoyl-[acp] + NADPH	Fatty acid biosynthesis	1.1.1.100 2.3.1.85 2.3.1.86
0.003	0.002	0.004	R02459	D-Ornithine:2-oxoglutarate aminotransferase	D-Ornithine + 2-Oxo acid <=> 5-Amino-2-oxopentanoic acid + D-Amino acid	D-Arginine and D-ornithine metabolism	2.6.1.21
0.003	0.002	0.004	R01699	Pyruvate:lipoamide 2-oxidoreductase(decarboxylating and acceptor-acetylating)	Pyruvate + Lipoamide <=> S-Acetyldihydrolipoamide + CO2		1.2.4.1
0.003	0.002	0.004	R01449	Acetyl-CoA:propanoate CoA-transferase	Lactoyl-CoA + Propanoate <=> (S)-Lactate + Propanoyl-CoA	Propanoate metabolism	2.8.3.1
0.003	0.002	0.004	R00530	ADP:sulfate adenylyltransferase	ADP + Sulfate <=> Orthophosphate + Adenylylsulfate	Sulfur metabolism	2.7.7.5
0.003	0.001	0.005	R07160	3-methyl-2-oxobutanoate:ferredoxin oxidoreductase (decarboxylating;CoA-2-methylpropanoylating)	3-Methyl-2-oxobutanoic acid + CoA + Oxidized ferredoxin <=> 2-Methylpropanoyl-CoA + CO2 + Reduced ferredoxin		1.2.7.7
0.003	0.001	0.005	R05199	Protein-N(pai)-phosphohistidine:sugar N(pai)-phosphotransferase	Protein N(pi)-phospho-L-histidine + N-Acetyl-D-glucosamine <=> Protein histidine + N-Acetyl-D-glucosamine 6-phosphate	Aminosugars metabolism	2.7.1.69
0.003	0.001	0.005	R01210	3-Methyl-2-oxobutanoate:NAD+ oxidoreductase (CoA-mehtylpropanoylating)	3-Methyl-2-oxobutanoic acid + CoA + NAD+ <=> 2-Methylpropanoyl-CoA + CO2 + NADH	Valine, leucine and isoleucine degradation	1.2.1.25
0.003	0.001	0.005	R00333	nucleoside-triphosphate:AMP phosphotransferase	Nucleoside triphosphate + AMP <=> NDP + ADP		2.7.4.10
0.003	0	0.006	R05048	GTP 7,8-8,9-dihydrolase	2,5-Diaminopyrimidine nucleoside triphosphate <=> 2,5-Diamino-6-(5\'-triphosphoryl-3\',4\'-trihydroxy-2\'-oxopentyl)- amino-4-oxopyrimidine	Folate biosynthesis	3.5.4.16 6.-.-.-
0.003	0	0.006	R05046	Formamidopyrimidine nucleoside triphosphate 7,8-8,9-dihydrolase	Formamidopyrimidine nucleoside triphosphate + H2O <=> 2,5-Diaminopyrimidine nucleoside triphosphate + Formate	Folate biosynthesis	3.5.4.16
0.003	0	0.006	R04639	2-Amino-4-hydroxy-6-(erythro-1,2,3-trihydroxypropyl) dihydropteridine triphosphate 7,8-8,9-dihydrolase	2-Amino-4-hydroxy-6-(erythro-1,2,3-trihydroxypropyl)dihydropteridine triphosphate + H2O <=> 2,5-Diamino-6-(5\'-triphosphoryl-3\',4\'-trihydroxy-2\'-oxopentyl)- amino-4-oxopyrimidine	Folate biosynthesis	3.5.4.16
0.003	0	0.006	R00815	phenol,NADPH:oxogen oxidoreductase (2-hydroxylating)	Phenol + Oxygen + NADPH + H+ <=> Catechol + NADP+ + H2O	Nitrobenzene degradation	1.14.13.7
0.003	0	0.006	R00697	L-Phenylalanine ammonia-lyase	L-Phenylalanine <=> trans-Cinnamate + NH3	Phenylalanine metabolism,Nitrogen metabolism,Alkaloid biosynthesis II	4.3.1.5
0.003	0	0.006	R00457	L-Lysine:2-oxoglutarate 6-aminotransferase	L-Lysine + 2-Oxoglutarate <=> L-2-Aminoadipate 6-semialdehyde + L-Glutamate	Lysine biosynthesis	2.6.1.36
0.003	0	0.006	R00428	GTP 7,8-8,9-dihydrolase	GTP + H2O <=> Formamidopyrimidine nucleoside triphosphate	Folate biosynthesis	3.5.4.16
0.003	0	0.006	R00287	UDPglucose pyrophosphohydrolase	UDP-glucose + H2O <=> UMP + D-Glucose 1-phosphate	Pyrimidine metabolism,Starch and sucrose metabolism	3.6.1.8 3.6.1.9
0.003	0	0.006	EC584	cytidine kinase (GTP)	[c]cytd + gtp --> cmp + gdp + h	Nucleotide Salvage Pathways
0.003	0	0.006	EC438	glutaminase	[c]gln-L + h2o --> glu-L + nh4	Glutamate metabolism	EC-3.5.1.2
0.0025	0.005	0	R07286	3-mercaptopyruvate:cyanide sulfurtransferase	Mercaptopyruvate + Cyanide <=> Pyruvate + Thiocyanate		2.8.1.2
0.0025	0.005	0	R01048	Glycerol hydro-lyase	Glycerol <=> Lactaldehyde + H2O	Glycerolipid metabolism	4.2.1.30
0.0025	0.005	0	R00895	L-Cysteine:2-oxoglutarate aminotransferase	L-Cysteine + 2-Oxoglutarate <=> Mercaptopyruvate + L-Glutamate	Cysteine metabolism	2.6.1.3
0.0025	0.005	0	R00790	Ammonia:ferredoxin oxidoreductase	NH3 + 2 H2O + 6 Oxidized ferredoxin <=> Nitrite + 6 Reduced ferredoxin + 7 H+	Nitrogen metabolism	1.7.7.1
0.0025	0.005	0	EC913	Cyanide sulfurtransferase	[c]cyan + tsul --> h + so3 + tcynt	Unassigned	EC-2.8.1.1
0.0025	0.005	0	EC707	D-lactate dehydrogenase	[c]lac-D + nad <==> h + nadh + pyr	Pyruvate metabolism	EC-1.1.1.28
0.0025	0.005	0	EC468	Glycolate dehydrogenase (NADP)	[c]glx + h + nadph --> glyclt + nadp	Glyoxylate Metabolism
0.0025	0.005	0	EC456	glycogen phosphorylase	[c]glycogen + pi --> g1p	Glycolysis/Gluconeogenesis	EC-2.4.1.1
0.0025	0.005	0	EC049	Glycolate oxidase	[c]glyclt + mqn8 --> glx + mql8	Alternate Carbon Metabolism
0.0025	0.004	0.001	R03441	Kynurenate,acceptor:oxygen oxidoreductase (hydroxylating)	4-Hydroxy-2-quinolinecarboxylic acid + Reduced acceptor + Oxygen <=> 7,8-Dihydro-7,8-dihydroxykynurenate + Acceptor		1.14.99.2
0.0025	0.004	0.001	R01914	Spermidine:(acceptor) oxidoreductase	Spermidine + Oxygen + H2O <=> 1,3-Diaminopropane + 4-Aminobutanal + H2O2	beta-Alanine metabolism	1.5.99.6
0.0025	0.004	0.001	R00921	acetyl-CoA:phosphate acetyltransferase	Propanoyl-CoA + Orthophosphate <=> Propanoyl phosphate + CoA	Propanoate metabolism	2.3.1.8
0.0025	0.004	0.001	R00325	(3S)-citramalate pyruvate-lyase	(S)-2-Methylmalate <=> Acetate + Pyruvate	C5-Branched dibasic acid metabolism	4.1.3.22
0.0025	0.004	0.001	R00237	(3S)-Citramalyl-CoA pyruvate-lyase	(3S)-Citramalyl-CoA <=> Acetyl-CoA + Pyruvate	Pyruvate metabolism,C5-Branched dibasic acid metabolism	4.1.3.22 4.1.3.25
0.0025	0.004	0.001	EC126	xylose isomerase	[c]fru --> glc-D	Alternate Carbon Metabolism	EC-5.3.1.5
0.0025	0.004	0.001	EC113	Propionate kinase	[c]adp + ppap <==> atp + ppa	Alternate Carbon Metabolism
0.0025	0.003	0.002	R05318	Ferrocytochrome-c:Fe3+ oxidoreductase	Ferrocytochrome c + Fe3+ <=> Ferricytochrome c + Fe2+		1.9.99.1
0.0025	0.003	0.002	R02057	CDPethanolamine:1,2-diacylglycerol ethanolaminephosphotransferase	CDP-ethanolamine + 1,2-Diacyl-sn-glycerol <=> CMP + Phosphatidylethanolamine	Glycerophospholipid metabolism	2.7.8.1
0.0025	0.003	0.002	R02052	Phosphatidylethanolamine cholinephosphohydrolase	Phosphatidylethanolamine + H2O <=> 1,2-Diacyl-sn-glycerol + Ethanolamine phosphate	Glycine, serine and threonine metabolism,Glycerophospholipid metabolism	3.1.4.3
0.0025	0.003	0.002	R01112	Glutathione:dehydroascorbate oxidoreductase	Dehydroascorbate + 2 Glutathione <=> Oxidized glutathione + Ascorbate	Glutamate metabolism,Glutathione metabolism	1.8.5.1
0.0025	0.002	0.003	R03857	Lauroyl-CoA:(acceptor) 2,3-oxidoreductase	Lauroyl-CoA + FAD <=> 2-trans-Dodecenoyl-CoA + FADH2	Fatty acid metabolism	1.3.3.6 1.3.99.3 1.3.99.13 1.3.99.-
0.0025	0.002	0.003	R03856	trans-Dodec-2-enoyl-CoA reductase	Lauroyl-CoA + NADP+ <=> 2-trans-Dodecenoyl-CoA + NADPH + H+	Fatty acid elongation in mitochondria	1.3.1.38
0.0025	0.002	0.003	R02728	beta-D-Glucose 1-phosphate 1,6-phosphomutase	beta-D-Glucose 1-phosphate <=> beta-D-Glucose 6-phosphate	Starch and sucrose metabolism	5.4.2.6
0.0025	0.002	0.003	R01817	D-mannitol-1-phosphate:NADP+ 6-oxidoreductase	D-Mannitol 1-phosphate + NADP+ <=> D-Mannose 6-phosphate + NADPH + H+		1.1.1.224
0.0025	0.002	0.003	R00977	5,6-Dihydrouracil:NAD+ oxidoreductase	5,6-Dihydrouracil + NAD+ <=> Uracil + NADH + H+	Pyrimidine metabolism,beta-Alanine metabolism,Pantothenate and CoA biosynthesis	1.3.1.1
0.0025	0.002	0.003	R00783	Ferrocytochrome-c:oxygen oxidoreductase	Nitric oxide + H2O + Ferricytochrome c <=> Nitrite + Ferrocytochrome c + 2 H+	Nitrogen metabolism	1.7.2.1
0.0025	0.002	0.003	R00631	Aldehyde:NAD+ oxidoreductase	Aldehyde + NAD+ + H2O <=> Fatty acid + NADH	Fatty acid metabolism	1.2.1.3
0.0025	0.001	0.004	R00538	Aldehyde:NAD+ oxidoreductase	Aldehyde + NAD+ + H2O <=> Carboxylate + NADH		1.2.1.3
0.0025	0	0.005	R05735	acetone:carbon-dioxide ligase (AMP-forming)	Acetone + CO2 + ATP + 2 H2O <=> Acetoacetate + AMP + 2 Orthophosphate		6.4.1.6
0.0025	0	0.005	R02321	NTP:deoxycitidine 5\'-phosphotransferase	Nucleoside triphosphate + Deoxycytidine <=> NDP + dCMP		2.7.1.74
0.0025	0	0.005	R01366	Acetoacetate carboxy-lyase	Acetoacetate <=> Acetone + CO2	Synthesis and degradation of ketone bodies,Propanoate metabolism	4.1.1.4
0.0025	0	0.005	R01018	CTP:dolichol O-phosphotransferase	CTP + Dolichol <=> CDP + Dolichyl phosphate	N-Glycan biosynthesis	2.7.1.108
0.0025	0	0.005	R01003	Dolichyl-phosphate phosphohydrolase	Dolichyl phosphate + H2O <=> Dolichol + Orthophosphate	N-Glycan biosynthesis	3.1.3.51
0.0025	0	0.005	R00026	beta-D-Glucoside glucohydrolase	Cellobiose + H2O <=> 2 beta-D-Glucose	Starch and sucrose metabolism	3.2.1.21
0.002	0.004	0	R04293		Pyridine-2,3-dicarboxylate + H2O <=> 2-Amino-3-carboxymuconate semialdehyde	Tryptophan metabolism
0.002	0.004	0	R03189	5-Formyltetrahydrofolate:L-glutamate N-formiminotransferase	5-Formyltetrahydrofolate + L-Glutamate <=> Tetrahydrofolate + N-Formyl-L-glutamate	One carbon pool by folate	2.1.2.5
0.002	0.004	0	R02665	3-Hydroxyanthranilate:oxygen 3,4-oxidoreductase (decyclizing)	3-Hydroxyanthranilate + Oxygen <=> 2-Amino-3-carboxymuconate semialdehyde	Tryptophan metabolism	1.13.11.6
0.002	0.004	0	R02527	(R)-Lactaldehyde:NAD+ oxidoreductase	(R)-Lactaldehyde + NAD+ <=> Methylglyoxal + NADH + H+	Pyruvate metabolism	1.1.1.78 1.1.1.79
0.002	0.004	0	R01816	Anthranilate,tetrahydrobiopterin:oxygen oxidoreductase (3-hydroxylating)	Tetrahydrobiopterin + Anthranilate + Oxygen <=> 3-Hydroxyanthranilate + Dihydrobiopterin + H2O	Tryptophan metabolism	1.14.16.3
0.002	0.004	0	R01735	(R)-Lactaldehyde:NAD+ 2-oxidoreductase	(R)-Lactaldehyde + NAD+ + H2O <=> (R)-Lactate + NADH	Pyruvate metabolism	1.2.1.23
0.002	0.004	0	EC594	5'-nucleotidase (GMP)	[c]gmp + h2o --> gsn + pi	Nucleotide Salvage Pathways	EC-3.1.3.5
0.002	0.004	0	EC558	Nucleoside triphosphate pyrophosphorylase (dttp)	[c]dttp + h2o --> dtmp + h + ppi	Nucleotide Salvage Pathways
0.002	0.004	0	EC482	CDP-Diacylglycerol pyrophostatase (Ecoli)	[c](0.02) cdpdag1 + h2o --> cmp + (2) h + (0.02) pa_EC	Membrane Lipid Metabolism	EC-3.6.1.26
0.002	0.004	0	EC137	2-dehydro-D-gluconate reductase (NADPH)	[c]2dhglcn + h + nadph --> glcn + nadp	Alternate Carbon Metabolism	EC-1.1.1.215
0.002	0.004	0	EC043	galactokinase	[c]atp + gal <==> adp + gal1p + h	Alternate Carbon Metabolism	EC-2.7.1.6
0.002	0.004	0	EC019	lactaldehyde dehydrogenase	[c]h2o + lald-L + nad <==> (2) h + lac-L + nadh	Alternate Carbon Metabolism	EC-1.2.1.22
0.002	0.004	0	EC012	beta-fructofuranosidase	[c]h2o + suc6p --> fru + g6p	Alternate Carbon Metabolism	EC-3.2.1.26
0.002	0.003	0.001	R03914	NADPH:protein-disulfide oxidoreductase	Protein dithiol + NADP+ <=> Protein disulfide + NADPH + H+		1.8.1.8
0.002	0.003	0.001	R03793		(S)-Mandelate + Acceptor <=> alpha-Oxo-benzeneacetic acid + Reduced acceptor		1.1.99.-
0.002	0.003	0.001	R03792		(S)-Mandelate + NAD+ <=> alpha-Oxo-benzeneacetic acid + NADH		1.1.1.-
0.002	0.003	0.001	R02963	Lactoyl-CoA hydro-lyase	Lactoyl-CoA <=> Propenoyl-CoA + H2O	Propanoate metabolism,Styrene degradation	4.2.1.54
0.002	0.003	0.001	R02212	Progesterone,hydrogen-donor:oxygen oxidoreductase (hydroxylating)	Progesterone + Reduced acceptor + Oxygen <=> Testosterone acetate + Acceptor + H2O		1.14.99.4
0.002	0.003	0.001	R02210	Ketosteroid,NADPH:oxygen oxidoreductase (20-hydroxylating, ester-producing/20-hydroxylating, side-chain cleaving/17-hydroxylating, lactonizing)	Progesterone + Oxygen + NADPH <=> Testosterone acetate + NADP+ + H2O		1.14.13.54
0.002	0.003	0.001	R01854	RCH2NH2:(acceptor) oxidoreductase (deaminating)	RCH2NH2 + H2O + Acceptor <=> Aldehyde + NH3 + Reduced acceptor		1.4.99.3 1.4.99.4
0.002	0.003	0.001	R01853	RCH2NH2:oxygen oxidoreductase(deaminating)(flavin-containing); RCH2NH2:oxygen oxidoreductase (deaminating) (copper-containing)	RCH2NH2 + H2O + Oxygen <=> Aldehyde + NH3 + H2O2		1.4.3.4 1.4.3.6
0.002	0.003	0.001	EC060	hydroxypyruvate isomerase	[c]hpyr <==> 2h3oppan	Alternate Carbon Metabolism	EC-5.3.1.22
0.002	0.002	0.002	R04919		3-Hydroxypropionyl-CoA + NADP+ <=> 3-Oxopropionyl-CoA + NADPH	Propanoate metabolism
0.002	0.002	0.002	R02269	5,6-Dihydrouracil amidohydrolase	5,6-Dihydrouracil + H2O <=> 3-Ureidopropionate	Pyrimidine metabolism,beta-Alanine metabolism,Pantothenate and CoA biosynthesis	3.5.2.2
0.002	0.002	0.002	R01443	Cellobiose:(acceptor) 1-oxidoreductase	Cellobiose + Acceptor <=> Cellobiono-1,5-lactone + Reduced acceptor		1.1.99.18
0.002	0.002	0.002	R01442	Cellobiose:oxygen 1-oxidoreductase	Cellobiose + Oxygen <=> Cellobiono-1,5-lactone + H2O2		1.1.99.18
0.002	0.002	0.002	R00905	N-Carbamoyl-beta-alanine amidohydrolase	3-Ureidopropionate + H2O <=> beta-Alanine + CO2 + NH3	Pyrimidine metabolism,beta-Alanine metabolism,Pantothenate and CoA biosynthesis	3.5.1.6
0.002	0.002	0.002	R00793	Hydroxylamine:oxygen oxidoreductase	Nitrite + H2O <=> Hydroxylamine + Oxygen	Nitrogen metabolism	1.7.3.4
0.002	0.002	0.002	R00744		Malonyl-CoA + H2O + NADP+ <=> 3-Oxopropionyl-CoA + Oxygen + NADPH	Propanoate metabolism
0.002	0.002	0.002	R00677	L-Tryptophan:oxygen oxidoreductase (deaminating)	L-Tryptophan + H2O + Oxygen <=> Indolepyruvate + NH3 + H2O2	Tryptophan metabolism	1.4.3.2
0.002	0.002	0.002	R00638		Aldehyde + Acceptor + H2O <=> Fatty acid + Reduced acceptor	Fatty acid metabolism	1.2.99.3
0.002	0.002	0.002	R00035	L-Ascorbate:oxygen oxidoreductase	Oxygen + 2 Ascorbate <=> 2 Dehydroascorbate + 2 H2O		1.10.3.3
0.002	0.001	0.003	R05508		Lactoyl-CoA + Acetate <=> (S)-Lactate + Acetyl-CoA	Styrene degradation	2.8.3.1
0.002	0.001	0.003	R04970	Hexadecanoyl-[acyl-carrier protein:malonyl-CoA C-acyltransferase(decarboxylating, oxoacyl- and enoyl-reducing and thioester-hydrolysing)	Hexadecanoyl-[acp] + NADP+ <=> trans-Hexadec-2-enoyl-[acp] + NADPH	Fatty acid biosynthesis	1.3.1.10 2.3.1.85
0.002	0.001	0.003	R03921	Sucrose 6-phosphate fructohydrolase	Sucrose 6-phosphate + H2O <=> beta-D-Fructose + alpha-D-Glucose 6-phosphate	Starch and sucrose metabolism	3.2.1.26
0.002	0.001	0.003	R00805	Sucrose-6-phosphate phosphohydrolase	Sucrose 6-phosphate + H2O <=> Sucrose + Orthophosphate	Starch and sucrose metabolism	3.1.3.24
0.002	0.001	0.003	R00635	Aldehyde:oxygen oxidoreductase	Aldehyde + Oxygen + H2O <=> Carboxylate + H2O2		1.2.3.1
0.002	0.001	0.003	R00625	primary_alcohol:NADP+ oxidoreductase	Primary alcohol + NADP+ <=> Aldehyde + NADPH + H+		1.1.1.2 1.1.1.71
0.002	0.001	0.003	R00274	Glutathione:hydrogen-peroxide oxidoreductase	H2O2 + 2 Glutathione <=> Oxidized glutathione + 2 H2O	Glutathione metabolism	1.11.1.9
0.002	0	0.004	R02704	Protein-N(pai)-phosphohistidine:sugar N(pai)-phosphotransferase	Protein N(pi)-phospho-L-histidine + Mannitol <=> Protein histidine + D-Mannitol 1-phosphate	Fructose and mannose metabolism	2.7.1.69
0.002	0	0.004	R00951	ADPglucose sugarphosphohydrolase	ADP-glucose + H2O <=> AMP + D-Glucose 1-phosphate	Starch and sucrose metabolism	3.6.1.21
0.002	0	0.004	R00184	P1,P4-Bis(5\'-adenosyl) tetraphosphate nucleotidohydrolase	P1,P4-Bis(5\'-adenosyl) tetraphosphate + H2O <=> ATP + AMP	Purine metabolism	3.6.1.17
0.002	0	0.004	R00126	ADP:ATP adenylyltransferase	ADP + ATP <=> Orthophosphate + P1,P4-Bis(5\'-adenosyl) tetraphosphate	Purine metabolism	2.7.7.53
0.002	0	0.004	EC288	NMN nucleosidase	[c]h2o + nmn --> h + ncam + r5p	Cofactor and Prosthetic Group Biosynthesis	EC-3.2.2.14
0.0015	0.003	0	R07213	L-tryptophan,tetrahydrobiopterin:oxygen oxidoreductase(5-hydroxylating)	L-Tryptophan + Tetrahydrobiopterin + Oxygen <=> 5-Hydroxy-L-tryptophan + 4a-Hydroxytetrahydrobiopterin		1.14.16.4
0.0015	0.003	0	R03972		3-Cyano-L-alanine <=> L-2,4-Diaminobutanoate	Cyanoamino acid metabolism
0.0015	0.003	0	R03439	kynurenate:oxygen oxidoreductase (hydroxylating)	4-Hydroxy-2-quinolinecarboxylic acid + Oxygen + NADH + H+ <=> 7,8-Dihydro-7,8-dihydroxykynurenate + NAD+	Tryptophan metabolism	1.14.99.2
0.0015	0.003	0	R02914	4,5-Dihydro-4-oxo-5-imidazolepropanoate hydro-lyase	4-Imidazolone-5-propanoate <=> Urocanate + H2O	Histidine metabolism	4.2.1.49
0.0015	0.003	0	R02288	4-imidazolone-5-propanoate amidohydrolase	4-Imidazolone-5-propanoate + H2O <=> N-Formimino-L-glutamate + H+	Histidine metabolism	3.5.2.7
0.0015	0.003	0	R02286	N-Formimino-L-glutamate iminohydrolase	N-Formimino-L-glutamate + H2O <=> N-Formyl-L-glutamate + NH3	Histidine metabolism	3.5.3.13
0.0015	0.003	0	R01814	L-Tryptophan,tetrahydrobiopterin:oxygen oxidoreductase (5-hydroxylating)	Tetrahydrobiopterin + L-Tryptophan + Oxygen <=> 5-Hydroxy-L-tryptophan + Dihydrobiopterin + H2O	Tryptophan metabolism	1.14.16.4
0.0015	0.003	0	R01365	Butanoyl-CoA:acetoacetate CoA-transferase	Butanoyl-CoA + Acetoacetate <=> Butanoic acid + Acetoacetyl-CoA		2.8.3.9
0.0015	0.003	0	R01168	L-Histidine ammonia-lyase	L-Histidine <=> Urocanate + NH3	Histidine metabolism,Nitrogen metabolism	4.3.1.3
0.0015	0.003	0	R01098	D-Galactose:oxygen 6-oxidoreductase	D-Galactose + Oxygen + H2O <=> D-Galactonate + H2O2	Galactose metabolism	1.1.3.9
0.0015	0.003	0	R00941	10-formyltetrahydrofolate:NADP+ oxidoreductase	10-Formyltetrahydrofolate + NADP+ + H2O <=> Tetrahydrofolate + CO2 + NADPH + H+	One carbon pool by folate	1.5.1.6
0.0015	0.003	0	R00833	(R)-2-Methyl-3-oxopropanoyl-CoA CoA-carbonylmutase	(R)-2-Methyl-3-oxopropanoyl-CoA <=> Succinyl-CoA	Valine, leucine and isoleucine degradation,Propanoate metabolism	5.4.99.2
0.0015	0.003	0	R00136	ATP:polyphosphate phosphotransferase	ATP + Pyrophosphate <=> ADP + Triphosphate		2.7.4.1
0.0015	0.003	0	EC914	catalase	[c](2) h2o2 --> (2) h2o + o2	Unassigned	EC-1.11.1.6
0.0015	0.003	0	EC559	Nucleoside triphosphate pyrophosphorylase (utp)	[c]h2o + utp --> h + ppi + ump	Nucleotide Salvage Pathways
0.0015	0.003	0	EC469	Glycolate dehydrogenase (NAD)	[c]glx + h + nadh --> glyclt + nad	Glyoxylate Metabolism
0.0015	0.003	0	EC386	pyridoxamine kinase	[c]atp + pydam --> adp + h + pyam5p	Cofactor and Prosthetic Group Biosynthesis	EC-2.7.1.35
0.0015	0.003	0	EC293	Pyridoxal 5-phosphate phosphatase	[c]h2o + pydx5p --> pi + pydx	Cofactor and Prosthetic Group Biosynthesis
0.0015	0.003	0	EC153	Aminobutyraldehyde dehydrogenase	[c]4abutn + h2o + nad --> 4abut + (2) h + nadh	Arginine and Proline Metabolism	EC-1.2.1.19
0.0015	0.003	0	EC148	malic enzyme (NAD)	[c]mal-L + nad --> co2 + nadh + pyr	Anaplerotic reactions	EC-1.1.1.38
0.0015	0.003	0	EC033	2-dehydro-3-deoxygalactonokinase	[c]2dh3dgal + atp --> 2dh3dgal6p + adp + h	Alternate Carbon Metabolism	EC-2.7.1.58
0.0015	0.003	0	EC032	2-dehydro-3-deoxy-6-phosphogalactonate aldolase	[c]2dh3dgal6p <==> g3p + pyr	Alternate Carbon Metabolism	EC-4.1.2.21
0.0015	0.003	0	EC031	galactonate dehydratase	[c]galctn-D --> 2dh3dgal + h2o	Alternate Carbon Metabolism	EC-4.2.1.6
0.0015	0.002	0.001	R07153	2-dehydro-D-gluconate:acceptor 2-oxidoreductase	2-Dehydro-D-gluconate + Acceptor <=> 2,5-Didehydro-D-gluconate + Reduced acceptor		1.1.99.4
0.0015	0.002	0.001	R05823	2-dehydro-D-gluconate:NADP+ 2-oxidoreductase	2-Dehydro-D-gluconate + NADP+ <=> 2,5-Didehydro-D-gluconate + NADPH + H+		1.1.1.274
0.0015	0.002	0.001	R05714	glutathione:NADP+ oxidoreductase (CoA-acylating)	CoA + Glutathione + NADP+ <=> CoA-glutathione + NADPH + H+		1.8.1.10
0.0015	0.002	0.001	R02419	(R)-Malate hydro-lyase	(R)-Malate <=> Maleic acid + H2O	Butanoate metabolism	4.2.1.31
0.0015	0.002	0.001	R01706	Oleoyl-[acyl-carrier-protein] hydrolase	Hexadecanoyl-[acp] + H2O <=> Acyl-carrier protein + Hexadecanoic acid	Fatty acid biosynthesis	2.3.1.85 3.1.2.14
0.0015	0.002	0.001	R01608	3-hydroxypropanoate:NAD+ oxidoreductase	3-Hydroxypropanoate + NAD+ <=> 3-Oxopropanoate + NADH + H+	beta-Alanine metabolism,Propanoate metabolism	1.1.1.59
0.0015	0.002	0.001	R01234	Guanosine 3\',5\'-cyclic phosphate 5\'-nucleotidohydrolase	3\',5\'-Cyclic GMP + H2O <=> GMP	Purine metabolism	3.1.4.17 3.1.4.35
0.0015	0.002	0.001	R01111	Coenzyme A:oxidized-glutathione oxidoreductase	Oxidized glutathione + CoA <=> CoA-glutathione + Glutathione	Glutathione metabolism	1.8.4.3
0.0015	0.002	0.001	R01087	Maleate cis-trans-isomerase	Maleic acid <=> Fumarate	Butanoate metabolism,Nicotinate and nicotinamide metabolism	5.2.1.1
0.0015	0.002	0.001	R00954	GTP:alpha-D-glucose-1-phosphate guanylyltransferase	GTP + D-Glucose 1-phosphate <=> Pyrophosphate + GDP-glucose	Starch and sucrose metabolism	2.7.7.34
0.0015	0.002	0.001	R00639	Alkan-1-ol dehydrogenase (acceptor)	Primary alcohol + Acceptor <=> Aldehyde + Reduced acceptor	Fatty acid metabolism	1.1.99.8 1.1.99.9 1.1.99.20
0.0015	0.002	0.001	R00434	GTP pyrophosphate-lyase (cyclizing)	GTP <=> 3\',5\'-Cyclic GMP + Pyrophosphate	Purine metabolism	4.6.1.1 4.6.1.2
0.0015	0.002	0.001	R00215	(R)-Malate:NAD+ oxidoreductase (decarboxylating)	(R)-Malate + NAD+ <=> Pyruvate + CO2 + NADH	Butanoate metabolism	1.1.1.83
0.0015	0.002	0.001	R00138	Triphosphate phosphohydrolase	Triphosphate + H2O <=> Pyrophosphate + Orthophosphate		3.6.1.25
0.0015	0.002	0.001	R00092	NADH:Fe2+ oxidoreductase	NAD+ + 2 Fe2+ <=> NADH + H+ + 2 Fe3+		1.16.1.7
0.0015	0.002	0.001	EC505	adenosylhomocysteinase	[c]ahcys + h2o <==> adn + hcys-L	Methionine Metabolism	EC-3.3.1.1
0.0015	0.002	0.001	EC497	Fatty acid oxidation (n-C16:0)	[c]atp + (8) coa + (7) fad + (7) h2o + hdca + (7) nad --> (8) accoa + amp + (7) fadh2 + (7) h + (7) nadh + ppi	Membrane Lipid Metabolism
0.0015	0.001	0.002	R05185	reduced ferredoxin:dinitrogen oxidoreductase (ATP-hydrolysing)	16 ATP + Nitrogen + 8 Reduced ferredoxin + 8 H+ + 16 H2O <=> 16 Orthophosphate + 16 ADP + 8 Oxidized ferredoxin + 2 NH3 + Hydrogen	Nitrogen metabolism	1.18.6.1
0.0015	0.001	0.002	R01849	Reduced ferredoxin:dinitrogen oxidoreductase (ATP-hydrolysing)	Hydrogen + 2 NH3 + 16 Orthophosphate + 16 ADP <=> Nitrogen + 8 e- + 16 ATP + 16 H2O + 8 H+		1.18.6.1
0.0015	0.001	0.002	R00642	L-Ascorbate:hydrogen-peroxide oxidoreductase	Ascorbate + H2O2 <=> Dehydroascorbate + 2 H2O		1.11.1.11
0.0015	0.001	0.002	R00623	primary_alcohol:NAD+ oxidoreductase	Primary alcohol + NAD+ <=> Aldehyde + NADH + H+	Fatty acid metabolism	1.1.1.1 1.1.1.71
0.0015	0.001	0.002	R00002	Reduced ferredoxin:dinitrogen oxidoreductase (ATP-hydrolysing)	16 ATP + 16 H2O <=> 8 e- + 8 H+ + 16 Orthophosphate + 16 ADP		1.18.6.1
0.0015	0	0.003	R07135	mannitol:NAD+ 1-oxidoreductase	Mannitol + NAD+ <=> D-Mannose + NADH + H+		1.1.1.255
0.0015	0	0.003	R03250		5-Amino-2-oxopentanoic acid + Urea <=> 5-Guanidino-2-oxopentanoate + H2O	D-Arginine and D-ornithine metabolism
0.0015	0	0.003	R03099		L-2-Aminoadipate + ATP + H2O <=> L-2-Aminoadipate adenylate + 2 Orthophosphate
0.0015	0	0.003	R03098	L-2-Aminoadipate-6-semialdehyde:NAD(P)+ 6-oxidoreductase	L-2-Aminoadipate + ATP <=> L-2-Aminoadipate adenylate + Pyrophosphate	Lysine biosynthesis	1.2.1.31
0.0015	0	0.003	R02253	trans-cinnamate,NADPH:oxygen oxidoreductase (4-hydroxylating)	trans-Cinnamate + Oxygen + NADPH + H+ <=> 4-Coumarate + NADP+ + H2O	Phenylalanine metabolism,Stilbene, coumarine and lignin biosynthesis	1.14.13.11
0.0015	0	0.003	R01426		Benzoate + Acetate + NADH + H+ <=> trans-Cinnamate + 2 H2O + NAD+	Phenylalanine metabolism
0.0015	0	0.003	R01203	N-Acyl-D-hexosamine:oxygen 1-oxidoreductase	N-Acetyl-D-glucosamine + Oxygen + H2O <=> N-Acetyl-D-glucosaminate + H2O2		1.1.3.29
0.0015	0	0.003	R01202	N-Acetyl-D-glucosamine:NAD+ 1-oxidoreductase	N-Acetyl-D-glucosamine + NAD+ + H2O <=> N-Acetyl-D-glucosaminate + NADH + H+		1.1.1.240
0.0015	0	0.003	R00978	5,6-Dihydrouracil:NADP+ oxidoreductase	5,6-Dihydrouracil + NADP+ <=> Uracil + NADPH + H+	Pyrimidine metabolism,beta-Alanine metabolism,Pantothenate and CoA biosynthesis	1.3.1.2
0.0015	0	0.003	R00558	L-Arginine,NADPH:oxygen oxidoreductase (nitric-oxide-forming)	L-Arginine + Oxygen + NADPH <=> N-(omega)-Hydroxyarginine + NADP+ + H2O	Arginine and proline metabolism	1.14.13.39
0.0015	0	0.003	R00331	ATP:nucleoside-diphosphate phosphatransferase	ATP + NDP <=> ADP + Nucleoside triphosphate		2.7.4.6
0.0015	0	0.003	R00111	N-(omega)-Hydroxyarginine,NADPH:oxygen oxidoreductase (nitric-oxide-forming)	NADPH + 2 N-(omega)-Hydroxyarginine + Oxygen + H+ <=> NADP+ + 2 Nitric oxide + 2 L-Citrulline	Arginine and proline metabolism	1.14.13.39
0.001	0.002	0	R07244	S-adenosyl-L-methionine:N,N-dimethylglycine N-methyltransferase	S-Adenosyl-L-methionine + N,N-Dimethylglycine <=> S-Adenosyl-L-homocysteine + Betaine		2.1.1.157
0.001	0.002	0	R07144	D-arabinitol:NADP+ oxidoreductase	D-Arabitol + NADP+ <=> D-Ribulose + NADPH + H+		1.1.1.287
0.001	0.002	0	R06982	S-(hydroxymethyl)glutathione synthase	Glutathione + Formaldehyde <=> S-(Hydroxymethyl)glutathione	Methane metabolism	4.4.1.22
0.001	0.002	0	R06870	Phosphoethanolamine phosphohydrolase	Ethanolamine phosphate + H2O <=> Ethanolamine + Orthophosphate	Glycerophospholipid metabolism	3.1.3.75
0.001	0.002	0	R05767	trehalose 6-phosphate:phosphate b-D-glucosyltransferase	alpha,alpha\'-Trehalose 6-phosphate + Orthophosphate <=> D-Glucose 6-phosphate + beta-D-Glucose 1-phosphate		2.4.1.216
0.001	0.002	0	R05554	Ureidoglycine aminohydrolase	Ureidoglycine + H2O <=> (-)-Ureidoglycolate + NH3	Purine metabolism	3.5.3.9
0.001	0.002	0	R03046	beta-Alanyl-CoA cmmonia-lyase	beta-Alanyl-CoA <=> Propenoyl-CoA + NH3	beta-Alanine metabolism,Propanoate metabolism	4.3.1.6
0.001	0.002	0	R02821	Trimethylaminoacetate:L-homosysteine S-methyltransferase	Betaine + L-Homocysteine <=> N,N-Dimethylglycine + L-Methionine	Glycine, serine and threonine metabolism,Methionine metabolism	2.1.1.5
0.001	0.002	0	R02765	(R)-2-Methyl-3-oxopropanoyl-CoA 2-epimerase	(R)-2-Methyl-3-oxopropanoyl-CoA <=> (S)-2-Methyl-3-oxopropanoyl-CoA	Valine, leucine and isoleucine degradation,Propanoate metabolism	5.1.99.1
0.001	0.002	0	R02423	Allantoate amidinohydrolase (decarboxylating)	Allantoate + H2O <=> Ureidoglycine + NH3 + CO2	Purine metabolism	3.5.3.9
0.001	0.002	0	R01915	Spermidine:(acceptor) oxidoreductase	Spermidine + Acceptor + H2O <=> 1,3-Diaminopropane + 4-Aminobutanal + Reduced acceptor	Arginine and proline metabolism	1.5.99.6
0.001	0.002	0	R00914		beta-Alanine + CoA <=> beta-Alanyl-CoA + H2O	Propanoate metabolism
0.001	0.002	0	R00527	S-Formylglutathione hydrolase	S-Formylglutathione + H2O <=> Formate + Glutathione	Methane metabolism	3.1.2.12
0.001	0.002	0	R00488	N-Acetyl-L-aspartate amidohydrolase	N-Acetyl-L-aspartate + H2O <=> Acetate + L-Aspartate	Alanine and aspartate metabolism	3.5.1.15
0.001	0.002	0	R00487	Acetyl-CoA:L-aspartate N-acetyltransferase	Acetyl-CoA + L-Aspartate <=> CoA + N-Acetyl-L-aspartate		2.3.1.17
0.001	0.002	0	EC615	D-lactate dehydrogenase	[c]lac-D + q8 --> pyr + q8h2	Oxidative phosphorylation	EC-1.1.2.4
0.001	0.002	0	EC519	Allantoate amidohydrolase	[c]alltt + h2o --> urdglyc + urea	Nitrogen	EC-3.5.3.4
0.001	0.002	0	EC384	pyridoxamine 5'-phosphate oxidase	[c]h2o + o2 + pyam5p --> h2o2 + nh4 + pydx5p	Cofactor and Prosthetic Group Biosynthesis	EC-1.4.3.5
0.001	0.002	0	EC151	Putrescine Transaminase	[c]akg + ptrc --> 4abutn + glu-L	Arginine and Proline Metabolism
0.001	0.002	0	EC136	2-dehydro-D-gluconate reductase (NADH)	[c]2dhglcn + h + nadh --> glcn + nad	Alternate Carbon Metabolism
0.001	0.002	0	EC128	xylulokinase	[c]atp + xylu-D --> adp + h + xu5p-D	Alternate Carbon Metabolism	EC-2.7.1.17
0.001	0.002	0	EC116	trehalose-6-phosphate hydrolase	[c]h2o + tre6p --> g6p + glc-D	Alternate Carbon Metabolism	EC-3.2.1.93
0.001	0.002	0	EC108	Methylmalonyl-CoA mutase	[c]succoa --> mmcoa-R	Alternate Carbon Metabolism	EC-5.4.99.2
0.001	0.002	0	EC025	Acetyl-CoA:butyrate-CoA transferase	[c]accoa + but --> ac + btcoa	Alternate Carbon Metabolism	EC-2.8.3.8
0.001	0.002	0	EC020	aldehyde dehydrogenase (acetaldehyde, NAD)	[c]acald + h2o + nad --> ac + (2) h + nadh	Alternate Carbon Metabolism	EC-1.2.1.3
0.001	0.002	0	EC017	lactaldehyde dehydrogenase	[c]h2o + lald-L + nad --> (2) h + lac-L + nadh	Alternate Carbon Metabolism	EC-1.2.1.22
0.001	0.002	0	EC014	methylmalonyl-CoA epimerase	[c]mmcoa-R <==> mmcoa-S	Alternate Carbon Metabolism	EC-5.1.99.1
0.001	0.002	0	EC004	L-asparaginase	[c]asn-L + h2o --> asp-L + nh4	Alanine and aspartate metabolism	EC-3.5.1.1
0.001	0.001	0.001	R07384		O-1-Alk-1-enyl-2-acyl-sn-glycero-3-phosphoethanolamine + CMP <=> 1-Alkenyl-2-acylglycerol + CDP-ethanolamine	Ether lipid metabolism	2.7.8.1
0.001	0.001	0.001	R07220	deoxycholate:FAD oxidoreductase (7alpha-dehydroxylating)	3alpha,12alpha-Dihydroxy-5beta-cholanate + FAD + H2O <=> 3alpha,7alpha,12alpha-Trihydroxy-5beta-cholanate + FADH2		1.17.99.5
0.001	0.001	0.001	R05836		3alpha,12alpha-Dihydroxy-5beta-chol-6-enoate + 2 H+ <=> 3alpha,12alpha-Dihydroxy-5beta-cholanate	Bile acid biosynthesis
0.001	0.001	0.001	R05817	(3Z)-phycocyanobilin:ferredoxin oxidoreductase	Biliverdin + Reduced ferredoxin <=> (3Z)-Phycocyanobilin + Oxidized ferredoxin	Porphyrin and chlorophyll metabolism	1.3.7.5
0.001	0.001	0.001	R05712	ammonia:ferricytochrome-c oxidoreductase	NH3 + 2 H2O + 6 Ferricytochrome c <=> Nitrite + 6 Ferrocytochrome c + 7 H+	Nitrogen metabolism	1.7.2.2
0.001	0.001	0.001	R05651	acetyl-phosphate:sulfite S-acetyltransferase (acyl-phosphate hydrolysing, 2-oxoethyl-forming)	Sulfoacetaldehyde + Orthophosphate <=> Acetyl phosphate + Sulfite	Taurine and hypotaurine metabolism	2.3.3.15
0.001	0.001	0.001	R05040		(3Z)-Phycocyanobilin + Acceptor <=> (3Z)-Phytochromobilin + Reduced acceptor + 2 H+	Porphyrin and chlorophyll metabolism
0.001	0.001	0.001	R04969	Hexadecanoyl-[acyl-carrier protein]:malonyl-CoA C-acyltransferase(decarboxylating, oxoacyl- and enoyl-reducing)	Hexadecanoyl-[acp] + NAD+ <=> trans-Hexadec-2-enoyl-[acp] + NADH	Fatty acid biosynthesis	1.3.1.9 2.3.1.86
0.001	0.001	0.001	R04788		Phytofluene + Acceptor <=> zeta-Carotene + Hydrogen + Reduced acceptor	Biosynthesis of steroids
0.001	0.001	0.001	R04787		Phytofluene <=> zeta-Carotene	Biosynthesis of steroids	1.3.99.-
0.001	0.001	0.001	R03913	NADH:protein-disulfide oxidoreductase	Protein dithiol + NAD+ <=> Protein disulfide + NADH + H+		1.8.1.8
0.001	0.001	0.001	R03678	(3Z)-phytochromobilin:ferredoxin oxidoreductase	(3Z)-Phytochromobilin + Oxidized ferredoxin <=> Biliverdin + Reduced ferredoxin	Porphyrin and chlorophyll metabolism	1.3.7.4
0.001	0.001	0.001	R03440	kynurenate:oxygen oxidoreductase (hydroxylating)	4-Hydroxy-2-quinolinecarboxylic acid + Oxygen + NADPH + H+ <=> 7,8-Dihydro-7,8-dihydroxykynurenate + NADP+	Tryptophan metabolism	1.14.99.2
0.001	0.001	0.001	R03249		5-Amino-2-oxopentanoic acid <=> 1-Pyrroline-2-carboxylate + H2O	Arginine and proline metabolism,D-Arginine and D-ornithine metabolism
0.001	0.001	0.001	R03158		3-Hydroxypropanoate + CoA <=> 3-Hydroxypropionyl-CoA + H2O	beta-Alanine metabolism,Propanoate metabolism	3.1.2.4
0.001	0.001	0.001	R02894	D-Proline:oxygen oxidoreductase (deaminating)	D-Proline + Oxygen <=> 1-Pyrroline-2-carboxylate + H2O2	Arginine and proline metabolism	1.4.3.3
0.001	0.001	0.001	R02798		3alpha,7alpha,12alpha-Trihydroxy-5beta-cholanate <=> 3alpha,12alpha-Dihydroxy-5beta-chol-6-enoate + H2O	Bile acid biosynthesis
0.001	0.001	0.001	R02737	UDPglucose:D-glucose-6-phosphate 1-alpha-D-glucosyltransferase	UDP-glucose + alpha-D-Glucose 6-phosphate <=> UDP + alpha,alpha\'-Trehalose 6-phosphate	Starch and sucrose metabolism	2.4.1.15
0.001	0.001	0.001	R02259	Propane-1,2-diol:NADP+ oxidoreductase	Propane-1,2-diol + NADP+ <=> (S)-Lactaldehyde + NADPH + H+		1.1.1.55
0.001	0.001	0.001	R02168	GDPglucose:D-glucose-6-phosphate 1-alpha-D-glucosyltransferase	GDP-glucose + D-Glucose 6-phosphate <=> GDP + alpha,alpha\'-Trehalose 6-phosphate		2.4.1.36
0.001	0.001	0.001	R01908	Oxalyl-CoA carboxy-lyase	Oxalyl-CoA <=> Formyl-CoA + CO2	Glyoxylate and dicarboxylate metabolism	4.1.1.8
0.001	0.001	0.001	R01809	N-Acetylneuraminate,hydrogen-donor:oxygen oxidoreductase (N-acetyl-hydroxylating)	N-Acetylneuraminate + Reduced acceptor + Oxygen <=> N-Glycoloyl-neuraminate + Acceptor + H2O
0.001	0.001	0.001	R01682	3-Sulfoalanine carboxy-lyase	L-Cysteate <=> Taurine + CO2	Taurine and hypotaurine metabolism	4.1.1.15 4.1.1.29
0.001	0.001	0.001	R01281	Palmitoyl-CoA:L-serine C-palmitoyltransferase (decarboxylating)	Palmitoyl-CoA + L-Serine <=> 3-Dehydrosphinganine + CoA + CO2	Sphingolipid metabolism	2.3.1.50
0.001	0.001	0.001	R01255	L-Proline racemase	L-Proline <=> D-Proline	Arginine and proline metabolism	5.1.1.4
0.001	0.001	0.001	R01108	Glutathione:dehydroascorbate oxidoreductase	L-Dehydroascorbate + 2 Glutathione <=> Oxidized glutathione + Ascorbate	Ascorbate and aldarate metabolism	1.8.5.1
0.001	0.001	0.001	R01025	Choline:(acceptor) 1-oxidoreductase	Choline + Acceptor <=> Betaine aldehyde + Reduced acceptor	Glycine, serine and threonine metabolism	1.1.99.1
0.001	0.001	0.001	R00901	L-Cysteine hydrogen-sulfide-lyase (adding sulfite)	L-Cysteine + Sulfite <=> Hydrogen sulfide + L-Cysteate	Cysteine metabolism,Taurine and hypotaurine metabolism	4.4.1.10
0.001	0.001	0.001	R00729	L-Tyrosine:oxygen oxidoreductase (deaminating)	L-Tyrosine + H2O + Oxygen <=> 3-(4-Hydroxyphenyl)pyruvate + NH3 + H2O2	Tyrosine metabolism,Phenylalanine, tyrosine and tryptophan biosynthesis,Alkaloid biosynthesis I	1.4.3.2
0.001	0.001	0.001	R00100	NADH:ferricytochrome-b5 oxidoreductase	NADH + 2 Ferricytochrome b5 + H+ <=> NAD+ + 2 Ferrocytochrome b5	Aminosugars metabolism	1.6.2.2
0.001	0.001	0.001	R00095	NADH:monodehydroascorbate oxidoreductase	NAD+ + 2 Ascorbate <=> NADH + 2 Monodehydroascorbate + H+	Ascorbate and aldarate metabolism	1.6.5.4
0.001	0.001	0.001	R00078	Fe(II):oxygen oxidoreductase	Oxygen + 4 Fe2+ + 4 H+ <=> 4 Fe3+ + 2 H2O	Porphyrin and chlorophyll metabolism	1.16.3.1
0.001	0.001	0.001	EC182	1-pyrroline-5-carboxylate dehydrogenase	[c]1pyr5c + (2) h2o + nad --> glu-L + h + nadh	Arginine and Proline Metabolism	EC-1.5.1.12
0.001	0	0.002	R07181	hydrogen:NADP+ oxidoreductase	Hydrogen + NADP+ <=> NADPH + H+		1.12.1.2
0.001	0	0.002	R05698	Mannitol:oxygen oxidoreductase (cyclizing)	Mannitol + Oxygen <=> D-Mannose + H2O2		1.1.3.40
0.001	0	0.002	R05641	ergosterol:NADP+ D24(241)-oxidoreductase	Ergosterol + NADP+ <=> Ergosta-5,7,22,24(28)-tetraen-3beta-ol + NADPH + H+		1.3.1.71
0.001	0	0.002	R05134	Salicin 6-phosphate glucohydrolase	Salicin 6-phosphate + H2O <=> Salicyl alcohol + beta-D-Glucose 6-phosphate	Glycolysis / Gluconeogenesis	3.2.1.86
0.001	0	0.002	R04661		CMP-N-acetylneuraminate + N-Acetylneuraminyl-D-galactosyl-N-acetyl-D-galactosaminyl-(N- acetylneuraminyl)-D-galactosyl-D-glucosylceramide <=> CMP + GT1b		2.4.99.8
0.001	0	0.002	R04649		CMP-N-acetylneuraminate + D-Galactosyl-N-acetyl-D-galactosaminyl-(N-acetylneuraminyl)-D- galactosyl-D-glucosylceramide <=> CMP + GD1b		2.4.99.8
0.001	0	0.002	R04586	N-Acetyl-D-galactosaminyl-(N-acetylneuraminyl)-D-galactosyl-D- glucosylceramide N-acetylhexosaminohydrolase	N-Acetyl-D-galactosaminyl-(N-acetylneuraminyl)-D-galactosyl-D- glucosylceramide + H2O <=> GM3 + N-Acetyl-D-galactosamine		3.2.1.52
0.001	0	0.002	R04452	1-Alkyl-2-acetyl-sn-glycero-3-phosphocholine acetohydrolase	2-Acetyl-1-alkyl-sn-glycero-3-phosphocholine + H2O <=> 1-Organyl-2-lyso-sn-glycero-3-phosphocholine + Acetate	Ether lipid metabolism	3.1.1.47
0.001	0	0.002	R04394	Protein-N(pai)-phosphohistidine:sugar N(pai)-phosphotransferase	Protein N(pi)-phospho-L-histidine + Salicin <=> Protein histidine + Salicin 6-phosphate	Glycolysis / Gluconeogenesis	2.7.1.69
0.001	0	0.002	R03676		Ergosterol + Acceptor <=> Ergosta-5,7,22,24(28)-tetraen-3beta-ol + Reduced acceptor + 2 H+	Biosynthesis of steroids
0.001	0	0.002	R03558	UDPglucose:salicyl-alcohol beta-D-glucosyltransferase	UDP-glucose + Salicyl alcohol <=> UDP + Salicin		2.4.1.172
0.001	0	0.002	R03492	beta-D-Galactosyl-1,4-beta-D-glucosylceramide N-acetylhexosaminohydrolase	GA2 + H2O <=> beta-D-Galactosyl-1,4-beta-D-glucosylceramide + N-Acetyl-D-galactosamine		3.2.1.52
0.001	0	0.002	R03437	Acetyl-CoA:1-alkyl-sn-glycero-3-phosphocholine 2-O-acetyltransferase	Acetyl-CoA + 1-Organyl-2-lyso-sn-glycero-3-phosphocholine <=> CoA + 2-Acetyl-1-alkyl-sn-glycero-3-phosphocholine	Ether lipid metabolism	2.3.1.67
0.001	0	0.002	R02956	Succinyl-CoA:citramalate CoA-transferase	Succinyl-CoA + Citramalate <=> Succinate + Citramalyl-CoA		2.8.3.7
0.001	0	0.002	R02955	Acetyl-CoA:citramalate CoA-transferase	Acetyl-CoA + Citramalate <=> Acetate + (3S)-Citramalyl-CoA		2.8.3.11
0.001	0	0.002	R02925	D-Sorbitol:(acceptor) 1-oxidoreductase	D-Sorbitol + FAD <=> FADH2 + L-Sorbose	Fructose and mannose metabolism	1.1.99.21
0.001	0	0.002	R02730	D-Fructose-2,6-bisphosphate 6-phosphohydrolase	beta-D-Fructose 2,6-bisphosphate + H2O <=> beta-D-Fructose 2-phosphate + Orthophosphate	Fructose and mannose metabolism	3.1.3.54
0.001	0	0.002	R02491	L-Citramalyl-CoA hydro-lyase	(3S)-Citramalyl-CoA <=> Itaconyl-CoA + H2O	C5-Branched dibasic acid metabolism	4.2.1.56
0.001	0	0.002	R02490	Citramalyl-CoA hydro-lyase	Citramalyl-CoA <=> Itaconyl-CoA + H2O		4.2.1.56
0.001	0	0.002	R01770	Inosine ribohydrolase	Inosine + H2O <=> Hypoxanthine + D-Ribose	Purine metabolism	3.2.2.1 3.2.2.2 3.2.2.8
0.001	0	0.002	R01711	Pyridoxine:oxygen oxidoreductase (deaminating)	Pyridoxine + Oxygen <=> Pyridoxal + H2O2	Vitamin B6 metabolism	1.1.3.12 1.4.3.5
0.001	0	0.002	R01708	Pyridoxine:NADP+ 4-oxidoreductase	Pyridoxine + NADP+ <=> Pyridoxal + NADPH + H+	Vitamin B6 metabolism	1.1.1.65
0.001	0	0.002	R01555	Maltose:orthophosphate 1-beta-D-glucosyltransferase	Maltose + Orthophosphate <=> D-Glucose + beta-D-Glucose 1-phosphate	Starch and sucrose metabolism	2.4.1.8
0.001	0	0.002	R01295	benzoate,NADPH:oxygen oxidoreductase(4-hydroxylating)	Benzoate + Oxygen + NADPH + H+ <=> 4-Hydroxybenzoate + NADP+ + H2O	Benzoate degradation via hydroxylation,Benzoate degradation via CoA ligation	1.14.13.12
0.001	0	0.002	R01232	P1,P4-Bis(5\'-nucleosyl)-tetraphosphate nucleotidohydrolase	P1,P4-Bis(5\'-guanosyl) tetraphosphate + H2O <=> GTP + GMP	Purine metabolism	3.6.1.17
0.001	0	0.002	R00885	GTP:alpha-D-mannose-1-phosphate guanylyltransferase	GTP + D-Mannose 1-phosphate <=> Pyrophosphate + GDP-mannose	Fructose and mannose metabolism	2.7.7.13
0.001	0	0.002	R00881	GDPmannose sugarphosphohydrolase	GDP-mannose + H2O <=> GMP + D-Mannose 1-phosphate	Fructose and mannose metabolism	3.6.1.21
0.001	0	0.002	R00872	D-Fructose 2-phosphate phosphatase	beta-D-Fructose 2-phosphate + H2O <=> D-Fructose + Orthophosphate	Fructose and mannose metabolism	3.1.3.-
0.001	0	0.002	R00865	D-Mannitol:ferricytochrome-c 2-oxidoreductase	Mannitol + 2 Ferricytochrome c <=> D-Fructose + 2 Ferrocytochrome c	Fructose and mannose metabolism	1.1.2.2
0.001	0	0.002	R00825	Anthranilate,NADPH:oxygen oxidoreductase (1,2-hydroxylating, deaminating, decarboxylating)	Anthranilate + Oxygen + NADPH + H+ <=> Catechol + NH3 + CO2 + NADP+	Benzoate degradation via hydroxylation,Carbazole degradation,Nitrogen metabolism	1.14.12.1
0.001	0	0.002	R00813	cis-1,2-dihydroxycyclohexa-3,5-diene-1-carboxylate:NAD+ oxidoreductase	1,6-Dihydroxy-cis-2,4-cyclohexadiene-1-carboxylic acid + NAD+ <=> Catechol + NADH + CO2 + H+	Benzoate degradation via hydroxylation,Benzoate degradation via CoA ligation	1.3.1.25
0.001	0	0.002	R00363	Oxaloacetate keto-enol-isomerase	Oxaloacetate <=> 2-Hydroxyethylenedicarboxylate		5.3.2.2
0.001	0	0.002	R00219		Pyruvate + CO2 <=> 2-Hydroxyethylenedicarboxylate	Pyruvate metabolism	4.1.1.-
0.001	0	0.002	R00040	Choline:oxygen 1-oxidoreductase	Oxygen + 2 Choline <=> 2 Betaine aldehyde + 2 H2O	Glycine, serine and threonine metabolism	1.1.3.17
0.001	0	0.002	R00012	GTP:GTP guanylyltransferase	2 GTP <=> Pyrophosphate + P1,P4-Bis(5\'-guanosyl) tetraphosphate		2.7.7.45
0.001	0	0.002	EC092	glucosamine-6-phosphate deaminase	[c]gam6p + h2o --> f6p + nh4	Alternate Carbon Metabolism	EC-3.5.99.6
0.0005	0.001	0	R07381	Plasmenylethanolamine ethanolamine phosphohydrolase	O-1-Alk-1-enyl-2-acyl-sn-glycero-3-phosphoethanolamine + H2O <=> 1-Alkenyl-2-acylglycerol + Ethanolamine phosphate	Ether lipid metabolism	3.1.4.3
0.0005	0.001	0	R07290	formyl-CoA:oxalate CoA-transferase	Formyl-CoA + Oxalate <=> Formate + Oxalyl-CoA		2.8.3.16
0.0005	0.001	0	R07229	selenite:reduced acceptor oxidoreductase	Selenite + H2O + Acceptor <=> Selenate + Reduced acceptor		1.97.1.9
0.0005	0.001	0	R07200	zeaxanthin,NAD(P)H:oxygen oxidoreductase	Antheraxanthin + NADPH + H+ + Oxygen <=> Violaxanthin + NADP+ + H2O		1.14.13.90
0.0005	0.001	0	R07178	violaxanthin:ascorbate oxidoreductase	Violaxanthin + Ascorbate <=> Antheraxanthin + Dehydroascorbate + H2O		1.10.99.3
0.0005	0.001	0	R07143	D-arabinitol:NADP+ oxidoreductase	D-Arabitol + NADP+ <=> D-Xylulose + NADPH + H+		1.1.1.287
0.0005	0.001	0	R07140	S-(hydroxymethyl)glutathione:NADP+ oxidoreductase	S-(Hydroxymethyl)glutathione + NADP+ <=> S-Formylglutathione + NADPH + H+		1.1.1.284
0.0005	0.001	0	R06983	S-(hydroxymethyl)glutathione dehydrogenase	S-(Hydroxymethyl)glutathione + NAD+ <=> S-Formylglutathione + NADH + H+	Methane metabolism	1.1.1.284
0.0005	0.001	0	R05492		1,1,1-Trichloro-2,2-bis(4-chlorophenyl)ethane + Oxygen <=> cis-2,3-Dihydrodiol 1,1,1-Trichloro-2,2-bis(4\'-chlorophenyl)ethane	1,1,1-Trichloro-2,2-bis(4-chlorophenyl)ethane (DDT),	1.14.99.-
0.0005	0.001	0	R05260		1,1,1-Trichloro-2,2-bis(4-chlorophenyl)ethane + Reduced acceptor + Oxygen <=> cis-2,3-Dihydrodiol 1,1,1-Trichloro-2,2-bis(4\'-chlorophenyl)ethane + Acceptor
0.0005	0.001	0	R04929	ATP:sulfate adenylyltransferase	ATP + Selenate <=> Pyrophosphate + Adenylylselenate	Selenoamino acid metabolism	2.7.7.4
0.0005	0.001	0	R04927	AMP,sulfite:(acceptor) oxidoreductase	Ferricytochrome c + Selenite + AMP <=> Ferrocytochrome c + Adenylylselenate	Selenoamino acid metabolism	1.8.99.2
0.0005	0.001	0	R04584	(N-Acetylneuraminyl)-galactosylglucosylceramide N-acetylgalactosaminyltransferase	UDP-N-acetyl-D-galactosamine + GM3 <=> UDP + N-Acetyl-D-galactosaminyl-(N-acetylneuraminyl)-D-galactosyl-D- glucosylceramide		2.4.1.92
0.0005	0.001	0	R04138	3-Methylcrotonoyl-CoA:carbon-dioxide ligase (ADP-forming)	ATP + 3-Methylcrotonyl-CoA + HCO3- <=> ADP + Orthophosphate + 3-Methylglutaconyl-CoA	Valine, leucine and isoleucine degradation	6.4.1.4
0.0005	0.001	0	R04097		3-Methylbutanoyl-CoA + Dihydrolipoamide <=> S-(3-Methylbutanoyl)-dihydrolipoamide + CoA	Valine, leucine and isoleucine degradation	2.3.1.-
0.0005	0.001	0	R03490	UDP-N-Acetyl-D-galactosamine:(N-acetylneuraminyl)-D-galactosyl--D- glucosylceramide N-acetyl-D-galactrosaminyltransferase	UDP-N-acetyl-D-galactosamine + beta-D-Galactosyl-1,4-beta-D-glucosylceramide <=> UDP + GA2		2.4.1.92
0.0005	0.001	0	R03405	3\'-phosphoadenylylsulfate:alcohol sulfotransferase	3\'-Phosphoadenylyl sulfate + 3beta-Hydroxyandrost-5-en-17-one <=> Adenosine 3\',5\'-bisphosphate + 3beta-Hydroxyandrost-5-en-17-one 3-sulfate	Androgen and estrogen metabolism	2.8.2.2
0.0005	0.001	0	R03404	3beta-Hydroxyandrost-5-en-17-one 3-sulfate sulfohydrolase	3beta-Hydroxyandrost-5-en-17-one 3-sulfate + H2O <=> 3beta-Hydroxyandrost-5-en-17-one + Sulfate	Androgen and estrogen metabolism	3.1.6.2
0.0005	0.001	0	R03270	2-(alpha-Hydroxyethyl)thiamine diphosphate:lipoamide 2-oxidoreductase(decarboxylating and acceptor-acetylating)	2-(alpha-Hydroxyethyl)thiamine diphosphate + Lipoamide <=> S-Acetyldihydrolipoamide + Thiamin diphosphate	Glycolysis / Gluconeogenesis	1.2.4.1
0.0005	0.001	0	R03185		Monodehydroascorbate + Acceptor <=> L-Dehydroascorbate + Reduced acceptor	Ascorbate and aldarate metabolism
0.0005	0.001	0	R03181	4-Maleylacetoacetate cis-trans-isomerase	4-Maleylacetoacetate <=> 4-Fumarylacetoacetate	Tyrosine metabolism,Styrene degradation	5.2.1.2
0.0005	0.001	0	R03157		3-Hydroxypropionyl-CoA + Orthophosphate + ADP <=> 3-Hydroxypropanoate + CoA + ATP	Propanoate metabolism	3.1.2.4 6.2.1.-
0.0005	0.001	0	R03064	acetyl-CoA:deacetylcephalosporin-C O-acetyltransferase	Cephalosporin C + CoA <=> Deacetylcephalosporin C + Acetyl-CoA	Penicillins and cephalosporins biosynthesis	2.3.1.175
0.0005	0.001	0	R03062	Cephalosporin-C acetylhdrolase	Cephalosporin C + H2O <=> Deacetylcephalosporin C + Acetate	Penicillins and cephalosporins biosynthesis	3.1.1.41
0.0005	0.001	0	R02978	Sphinganine:NADP+ 3-oxidoreductase	Sphinganine + NADP+ <=> 3-Dehydrosphinganine + NADPH + H+	Sphingolipid metabolism	1.1.1.102
0.0005	0.001	0	R02976	ATP:sphinganine 1-phosphotransferase	ATP + Sphinganine <=> ADP + Sphinganine 1-phosphate	Sphingolipid metabolism	2.7.1.91
0.0005	0.001	0	R02965	Hydrogen:quinone oxidoreductase	Menaquinone + Hydrogen <=> Menaquinol		1.12.5.1
0.0005	0.001	0	R02964		Menaquinone + 2 H+ <=> Menaquinol		1.6.5.-
0.0005	0.001	0	R02577	Propane-1,2-diol:NAD+ 1-oxidoreductase	Propane-1,2-diol + NADP+ <=> Lactaldehyde + NADPH + H+	Glycerolipid metabolism,Pyruvate metabolism	1.1.1.21
0.0005	0.001	0	R02521	4-Hydroxyphenylpyruvate:oxygen oxidoreductase (hydroxylating,decarboxylating)	3-(4-Hydroxyphenyl)pyruvate + Oxygen <=> Homogentisate + CO2	Tyrosine metabolism	1.13.11.27
0.0005	0.001	0	R02519	Homogentisate:oxygen 1,2-oxidoreductase (decyclizing)	Homogentisate + Oxygen <=> 4-Maleylacetoacetate	Tyrosine metabolism,Styrene degradation	1.13.11.5
0.0005	0.001	0	R02464	Sphinganine-1-phosphate pamlmitaldehyde-lyase	Sphinganine 1-phosphate <=> Ethanolamine phosphate + Hexadecanal	Sphingolipid metabolism	4.1.2.27
0.0005	0.001	0	R02315	N6-(L-1,3-Dicarboxypropyl)-L-lysine:NADP+ oxidoreductase	N6-(L-1,3-Dicarboxypropyl)-L-lysine + NADP+ + H2O <=> L-Glutamate + L-2-Aminoadipate 6-semialdehyde + NADPH + H+	Lysine biosynthesis,Lysine degradation	1.5.1.10
0.0005	0.001	0	R02302	5-Formiminotetrahydrofolate ammonia-lyase (cyclizing)	5-Formiminotetrahydrofolate <=> 5,10-Methenyltetrahydrofolate + NH3	One carbon pool by folate	4.3.1.4
0.0005	0.001	0	R02287	5-Formiminotetrahydrofolate:L-glutamate N-formiminotransferase	5-Formiminotetrahydrofolate + L-Glutamate <=> Tetrahydrofolate + N-Formimino-L-glutamate	Histidine metabolism,One carbon pool by folate	2.1.2.5
0.0005	0.001	0	R02085	(S)-3-Hydroxy-3-methylglutaryl-CoA hydro-lyase	(S)-3-Hydroxy-3-methylglutaryl-CoA <=> 3-Methylglutaconyl-CoA + H2O	Valine, leucine and isoleucine degradation	4.2.1.18
0.0005	0.001	0	R01986	4-Aminobutyraldehyde:NAD+ oxidoreductase	4-Aminobutanal + NADP+ + H2O <=> 4-Aminobutanoate + NADPH	Arginine and proline metabolism	1.2.1.3
0.0005	0.001	0	R01916	N1-Acetylspermidine amidohydrolase	N1-Acetylspermidine + H2O <=> Acetate + Spermidine		3.5.1.48
0.0005	0.001	0	R01803	N-acetylneuraminate,ferrocytochrome-b5:oxygen oxidoreductase (N-acetyl-hydroxylating)	N-Acetylneuraminate + 2 Ferrocytochrome b5 + Oxygen + 2 H+ <=> N-Glycoloyl-neuraminate + 2 Ferricytochrome b5 + H2O	Aminosugars metabolism	1.14.18.2
0.0005	0.001	0	R01702	4-methyl-2-oxopentanoate:lipoamide oxidoreductase(decarboxylating and acceptor-3-methylbutanoylating)	4-Methyl-2-oxopentanoate + Lipoamide <=> S-(3-Methylbutanoyl)-dihydrolipoamide + CO2	Valine, leucine and isoleucine degradation	1.2.4.4
0.0005	0.001	0	R01586	Methylamine:L-glutamate N-methyltransferase	Methylamine + L-Glutamate <=> NH3 + N-Methyl-L-glutamate	Methane metabolism	2.1.1.21
0.0005	0.001	0	R01408	Formamide hydro-lyase	Formamide <=> Hydrogen cyanide + H2O	Cyanoamino acid metabolism	4.2.1.66
0.0005	0.001	0	R01364	4-Fumarylacetoacetate fumarylhydrola	Acetoacetate + Fumarate <=> 4-Fumarylacetoacetate + H2O	Tyrosine metabolism,Styrene degradation	3.7.1.2
0.0005	0.001	0	R01360	(S)-3-Hydroxy-3-methylglutaryl-CoA acetoacetate-lyase	(S)-3-Hydroxy-3-methylglutaryl-CoA <=> Acetyl-CoA + Acetoacetate	Synthesis and degradation of ketone bodies,Valine, leucine and isoleucine degradation,Butanoate metabolism	4.1.3.4
0.0005	0.001	0	R01358	Acetoacetyl-CoA hydrolase	Acetoacetyl-CoA + H2O <=> Acetoacetate + CoA	Butanoate metabolism	3.1.2.11
0.0005	0.001	0	R01291	S-Ribosyl-L-homocysteine ribohydrolase	S-Ribosyl-L-homocysteine + H2O <=> D-Ribose + L-Homocysteine	Methionine metabolism	4.4.1.21
0.0005	0.001	0	R01176	Butanoate:CoA ligase (AMP-forming)	ATP + Butanoic acid + CoA <=> AMP + Pyrophosphate + Butanoyl-CoA	Butanoate metabolism	6.2.1.2
0.0005	0.001	0	R00716	N6-(L-1,3-Dicarboxypropyl)-L-lysine:NADP+ oxidoreductase (L-lysine-forming)	N6-(L-1,3-Dicarboxypropyl)-L-lysine + NADP+ + H2O <=> L-Lysine + 2-Oxoglutarate + NADPH + H+	Lysine biosynthesis,Lysine degradation	1.5.1.8
0.0005	0.001	0	R00609	N-Methyl-L-glutamate:(acceptor) oxidoreductase (demethylating)	N-Methyl-L-glutamate + Acceptor + H2O <=> L-Glutamate + Formaldehyde + Reduced acceptor	Methane metabolism	1.5.99.5
0.0005	0.001	0	R00531	Adenylylsulfate sulfohydrolase	Adenylylsulfate + H2O <=> AMP + Sulfate	Sulfur metabolism	3.6.2.1
0.0005	0.001	0	R00524	Formamide amidohydrolase	Formamide + H2O <=> Formate + NH3	Glyoxylate and dicarboxylate metabolism,Nitrogen metabolism	3.5.1.49
0.0005	0.001	0	R00507	3\'-Phosphoadenylylsulfate nucleotidohydrolase	3\'-Phosphoadenylyl sulfate + H2O <=> Sulfate + Adenosine 3\',5\'-bisphosphate	Purine metabolism,Sulfur metabolism	3.6.1.9 3.6.2.2
0.0005	0.001	0	R00367	S-Adenosyl-L-methionine:glycine methyltransferase	S-Adenosyl-L-methionine + Glycine <=> S-Adenosyl-L-homocysteine + Sarcosine	Glycine, serine and threonine metabolism	2.1.1.20 2.1.1.156
0.0005	0.001	0	R00273	oxalate:oxygen oxidoreductase	Oxalate + Oxygen <=> H2O2 + 2 CO2	Glyoxylate and dicarboxylate metabolism	1.2.3.4
0.0005	0.001	0	R00148		NH3 + Oxygen <=> Hydroxylamine + H2O	Nitrogen metabolism	1.13.12.-
0.0005	0.001	0	EC718	lysine decarboxylase	[c]h + lys-L --> 15dap + co2	Threonine and Lysine Metabolism	EC-4.1.1.18
0.0005	0.001	0	EC708	Formate-hydrogen lyase	[c]for + h --> co2 + h2	Pyruvate metabolism
0.0005	0.001	0	EC683	N-acetyl-D-mannosamine kinase	[c]acmana + atp --> acmanap + adp + h	Putative	EC-2.7.1.60
0.0005	0.001	0	EC682	N-acetylmannosamine 6-phoshpate epimerase	[c]acmanap --> acgam6p	Putative
0.0005	0.001	0	EC623	glycerol-3-phosphate dehydrogenase (demethylmenaquinone-8)	[c]2dmmq8 + glyc3p --> 2dmmql8 + dhap	Oxidative phosphorylation	EC-1.1.99.5
0.0005	0.001	0	EC619	Trimethylamine N-oxide reductase (demethylmenaquinol 8)	[c]2dmmql8 + h + tmao --> 2dmmq8 + h2o + tma	Oxidative phosphorylation
0.0005	0.001	0	EC607	L-Lactate dehydrogenase (ubiquinone)	[c]lac-L + q8 --> pyr + q8h2	Oxidative phosphorylation	EC-1.1.2.3
0.0005	0.001	0	EC545	Nucleoside triphosphate tripolyhydrolase	[c]gtp + h2o --> gsn + pppi	Nucleotide Salvage Pathways	EC-3.1.5.1
0.0005	0.001	0	EC515	hydroxyacylglutathione hydrolase	[c]h2o + lgt-S --> gthrd + h + lac-D	Methylglyoxal Metabolism	EC-3.1.2.6
0.0005	0.001	0	EC513	S-adenosylhomocysteine nucleosidase	[c]ahcys + h2o --> ade + rhcys	Methionine Metabolism	EC-3.2.2.9
0.0005	0.001	0	EC448	Glucose-1-phosphatase	[c]g1p + h2o --> glc-D + pi	Glycolysis/Gluconeogenesis	EC-3.1.3.10
0.0005	0.001	0	EC387	pyridoxal kinase	[c]atp + pydx --> adp + h + pydx5p	Cofactor and Prosthetic Group Biosynthesis	EC-2.7.1.35
0.0005	0.001	0	EC292	hypothetical enyme	[c]h2o + pyam5p --> pi + pydam	Cofactor and Prosthetic Group Biosynthesis
0.0005	0.001	0	EC189	Spermidine acetyltransferase	[c]accoa + spmd --> N1aspmd + coa + h	Arginine and Proline Metabolism	EC-2.3.1.57
0.0005	0.001	0	EC133	Methylmalonyl-CoA decarboxylase	[c]h + mmcoa-S --> co2 + ppcoa	Alternate Carbon Metabolism	EC-4.1.1.41
0.0005	0.001	0	EC066	b-galactosidase	[c]h2o + lcts --> gal + glc-D	Alternate Carbon Metabolism	EC-3.2.1.23
0.0005	0	0.001	R07385		O-1-Alk-1-enyl-2-acyl-sn-glycero-3-phosphoethanolamine + H2O <=> 2-Acyl-1-(1-alkenyl)-sn-glycero-3-phosphate + Ethanolamine	Ether lipid metabolism	3.1.4.4
0.0005	0	0.001	R07383		2-Acyl-1-(1-alkenyl)-sn-glycero-3-phosphate + H2O <=> 1-Alkenyl-2-acylglycerol + Orthophosphate	Ether lipid metabolism	3.1.3.-
0.0005	0	0.001	R06872	Acyl-CoA:sn-glycerol-3-phosphate 2-O-acyltransferase	sn-Glycerol 3-phosphate + Acyl-CoA <=> 2-Acyl-sn-glycerol 3-phosphate + CoA	Glycerophospholipid metabolism
0.0005	0	0.001	R05701	Coniferyl aldehyde:NADP oxidoreductase	Coniferyl aldehyde + H2O + NADP+ <=> Ferulate + NADPH + H+		1.2.1.68
0.0005	0	0.001	R05700	Coniferyl aldehyde:NAD oxidoreductase	Coniferyl aldehyde + H2O + NAD+ <=> Ferulate + NADH + H+		1.2.1.68
0.0005	0	0.001	R05622		Benzoate + NADPH + H+ + Oxygen <=> 1,6-Dihydroxy-cis-2,4-cyclohexadiene-1-carboxylic acid + NADP+	Benzoate degradation via hydroxylation,Benzoate degradation via CoA ligation	1.14.12.10
0.0005	0	0.001	R05621		Benzoate + NADH + H+ + Oxygen <=> 1,6-Dihydroxy-cis-2,4-cyclohexadiene-1-carboxylic acid + NAD+	Benzoate degradation via hydroxylation,Benzoate degradation via CoA ligation	1.14.12.10
0.0005	0	0.001	R05103		3-Ketosphingosine + CO2 + CoA <=> trans-Hexadec-2-enoyl-CoA + L-Serine
0.0005	0	0.001	R04967	Tetradecanoyl-[acyl-carrier protein]:malonyl-CoA C-acyltransferase(decarboxylating, oxoacyl- and enoyl-reducing and thioester-hydrolysing)	Tetradecanoyl-[acp] + NADP+ <=> trans-Tetradec-2-enoyl-[acp] + NADPH	Fatty acid biosynthesis	1.3.1.10 2.3.1.85
0.0005	0	0.001	R04966	Tetradecanoyl-[acyl-carrier protein]:malonyl-CoA C-acyltransferase(decarboxylating, oxoacyl- and enoyl-reducing)	Tetradecanoyl-[acp] + NAD+ <=> trans-Tetradec-2-enoyl-[acp] + NADH	Fatty acid biosynthesis	1.3.1.9 2.3.1.86
0.0005	0	0.001	R04488		4-Carboxy-2-hydroxymuconate semialdehyde + H2O <=> 4-Carboxy-2-oxo-4-pentanoate + Formate	Benzoate degradation via hydroxylation	3.7.1.-
0.0005	0	0.001	R04433	Electron-transferring-flavoprotein:ubiquinone oxidoreductase	Reduced electron-transferring flavoprotein + Ubiquinone <=> Electron-transferring flavoprotein + Ubiquinol		1.5.5.1
0.0005	0	0.001	R04432	Propanoyl-CoA:(acceptor) 2,3-oxidoreductase	Electron-transferring flavoprotein + Propanoyl-CoA <=> Reduced electron-transferring flavoprotein + Propenoyl-CoA	Propanoate metabolism	1.3.99.3
0.0005	0	0.001	R04417		4-Hydroxy-4-methyl-2-oxoglutarate <=> 4-Carboxy-2-oxo-4-pentanoate + H2O	Benzoate degradation via hydroxylation	4.2.1.-
0.0005	0	0.001	R04215	CTP:N-acylneuraminate cytidylyltransferase	CTP + N-Glycoloyl-neuraminate <=> Pyrophosphate + CMP-N-glycoloylneuraminate	Aminosugars metabolism	2.7.7.43
0.0005	0	0.001	R04200	D-threo-2,4-diaminopentanoate:NAD+ oxidoreductase (deaminating)	(2R,4S)-2,4-Diaminopentanoate + H2O + NAD+ <=> 2-Amino-4-oxopentanoic acid + NH3 + NADH + H+	D-Arginine and D-ornithine metabolism	1.4.1.12
0.0005	0	0.001	R04126	ATP:1-O-alkyl-sn-glycerol 3-phosphotransferase	ATP + 1-Alkyl-sn-glycerol <=> ADP + 1-Alkyl-sn-glycero-3-phosphate	Ether lipid metabolism	2.7.1.93
0.0005	0	0.001	R04092		3-Dehydrosphinganine + FAD <=> 3-Ketosphingosine + FADH2
0.0005	0	0.001	R04045		2,3-Dihydroxyindole + H2O <=> Indoxyl + Oxygen	Tryptophan metabolism
0.0005	0	0.001	R04043	2-Acetyl-1-alkyl-sn-glycerol acetylhydrolase	1-Alkyl-2-acetyl-sn-glycerol + H2O <=> 1-Alkyl-sn-glycerol + Acetate		3.1.1.71
0.0005	0	0.001	R04008		4-Guanidinobutanal + CO2 <=> 2-Oxoarginine	Arginine and proline metabolism	4.1.1.-
0.0005	0	0.001	R03891	Benzene-1,2,4-triol:oxygen 1,2-oxidoreductase (decyclizing)	Benzene-1,2,4-triol + Oxygen <=> 2-Maleylacetate	1,4-Dichlorobenzene degradation	1.13.11.37
0.0005	0	0.001	R03455	Acetyl-CoA:1-alkyl-sn-glycero-3-phosphate 2-O-acetyltransferase	Acetyl-CoA + 1-Alkyl-sn-glycero-3-phosphate <=> CoA + 2-Acetyl-1-alkyl-sn-glycero-3-phosphate	Ether lipid metabolism	2.3.1.105
0.0005	0	0.001	R03454	1-Alkyl-2-acetyl-sn-glycero-3-phosphate phosphohydrolase	2-Acetyl-1-alkyl-sn-glycero-3-phosphate + H2O <=> 1-Alkyl-2-acetyl-sn-glycerol + Orthophosphate	Ether lipid metabolism	3.1.3.59
0.0005	0	0.001	R03316	3-Carboxy-1-hydroxypropyl-ThPP:lipoamde 2-oxidoreductase(decarboxylating and acceptor-succinylating)	3-Carboxy-1-hydroxypropyl-ThPP + Lipoamide <=> S-Succinyldihydrolipoamide + Thiamin diphosphate	Citrate cycle (TCA cycle)	1.2.4.2
0.0005	0	0.001	R03288	beta-Alanyl-N(pai)-methyl-L-histidine hydrolase	beta-Alanyl-N(pi)-methyl-L-histidine + H2O <=> beta-Alanine + N(pi)-Methyl-L-histidine	Histidine metabolism,beta-Alanine metabolism	3.4.13.5
0.0005	0	0.001	R03286	N(pai)-Methyl-L-histidine:beta-alanine ligase (AMP-forming)	ATP + N(pi)-Methyl-L-histidine + beta-Alanine <=> AMP + Pyrophosphate + beta-Alanyl-N(pi)-methyl-L-histidine	Histidine metabolism,beta-Alanine metabolism	3.4.13.20 6.3.2.11
0.0005	0	0.001	R03276	(S)-3-Hydroxybutanoyl-CoA 3-epimerase	(S)-3-Hydroxybutanoyl-CoA <=> (R)-3-Hydroxybutanoyl-CoA	Butanoate metabolism	5.1.2.3
0.0005	0	0.001	R03178	2-oxo-5-Guanidinopentanoate carboxy-lyase	5-Guanidino-2-oxopentanoate <=> 4-Guanidinobutanal + CO2		4.1.1.75
0.0005	0	0.001	R03109	Acyl-CoA:1-O-alk-1-enyl-glycero-3-phosphocholine 2-O-acyltransferase; Acyl-CoA:1-alkenylglycerophosphocholine O-acyltransferase	Acyl-CoA + 1-(1-Alkenyl)-sn-glycero-3-phosphocholine <=> CoA + Plasmenylcholine	Ether lipid metabolism	2.3.1.25 2.3.1.104
0.0005	0	0.001	R03107	Plasmenylcholine 2-acylhydrolase	Plasmenylcholine + H2O <=> 1-(1-Alkenyl)-sn-glycero-3-phosphocholine + Fatty acid anion		3.1.1.4
0.0005	0	0.001	R03045	3-Hydroxypropionyl-CoA hydro-lyase	3-Hydroxypropionyl-CoA <=> Propenoyl-CoA + H2O	beta-Alanine metabolism,Propanoate metabolism	4.2.1.17
0.0005	0	0.001	R03032	D-Arabinonate hydro-lyase	D-Arabinonate <=> 2-Dehydro-3-deoxy-D-xylonate + H2O		4.2.1.5
0.0005	0	0.001	R03027	(3R)-3-Hydroxybutanoyl-CoA hydro-lyase	(R)-3-Hydroxybutanoyl-CoA <=> Crotonoyl-CoA + H2O	Butanoate metabolism	4.2.1.55
0.0005	0	0.001	R02990	Succinyl-CoA:3-oxoadipate CoA-transferase	Succinyl-CoA + 3-Oxoadipate <=> Succinate + 3-Oxoadipyl-CoA	Benzoate degradation via hydroxylation	2.8.3.6
0.0005	0	0.001	R02989	3-oxoadipate:NADP+ oxidoreductase	3-Oxoadipate + NADP+ <=> 2-Maleylacetate + NADPH + H+	Benzoate degradation via hydroxylation	1.3.1.32
0.0005	0	0.001	R02924	D-Arginine:2-oxoglutarate aminotransferase	D-Arginine + 2-Oxo acid <=> 5-Guanidino-2-oxopentanoate + D-Amino acid	D-Arginine and D-ornithine metabolism	2.6.1.21
0.0005	0	0.001	R02923	D-Arginine:oxygen oxidoreductase (deaminating)	D-Arginine + H2O + Oxygen <=> 5-Guanidino-2-oxopentanoate + NH3 + H2O2	D-Arginine and D-ornithine metabolism	1.4.3.3
0.0005	0	0.001	R02758	ATP:acylglycerol 3-phosphotransferase	ATP + 2-Acylglycerol <=> ADP + 2-Acyl-sn-glycerol 3-phosphate		2.7.1.94
0.0005	0	0.001	R02727	alpha,alpha-Trehalose:orthophosphate beta-D-glucosyltransferase	alpha,alpha-Trehalose + Orthophosphate <=> D-Glucose + beta-D-Glucose 1-phosphate	Starch and sucrose metabolism	2.4.1.64
0.0005	0	0.001	R02714	D-Arabinono-1,4-lactone lactonohydrolase	D-Arabinono-1,4-lactone + H2O <=> D-Arabinonate		3.1.1.30
0.0005	0	0.001	R02697	4-Hydroxyphenylacetaldehyde:NADP+ oxidoreductase	4-Hydroxyphenylacetaldehyde + NADP+ + H2O <=> 4-Hydroxyphenylacetate + NADPH + H+	Tyrosine metabolism	1.2.1.5
0.0005	0	0.001	R02695	4-Hydroxyphenylacetaldehyde:NAD+ oxidoreductase	4-Hydroxyphenylacetaldehyde + NAD+ + H2O <=> 4-Hydroxyphenylacetate + NADH + H+	Tyrosine metabolism	1.2.1.5 1.2.1.29 1.2.1.53
0.0005	0	0.001	R02461	D-Ornithine 4,5-aminomutase	D-Ornithine <=> (2R,4S)-2,4-Diaminopentanoate	D-Arginine and D-ornithine metabolism	5.4.3.5
0.0005	0	0.001	R02339		Indole + Oxygen <=> Indoxyl + H2O	Tryptophan metabolism	1.14.16.-
0.0005	0	0.001	R02277	Secondary-alcohol:oxygen oxidoreductase	Secondary alcohol + Oxygen <=> Ketone + H2O2		1.1.3.18
0.0005	0	0.001	R02257	Propane-1,2-diol:NAD+ oxidoreductase	Propane-1,2-diol + NAD+ <=> (S)-Lactaldehyde + NADH	Pyruvate metabolism	1.1.1.77
0.0005	0	0.001	R01976	(S)-3-Hydroxybutanoyl-CoA:NADP+ oxidoreductase	(S)-3-Hydroxybutanoyl-CoA + NADP+ <=> Acetoacetyl-CoA + NADPH + H+	Butanoate metabolism	1.1.1.157
0.0005	0	0.001	R01782	2-Dehydro-3-deoxy-D-pentanoate glycoaldehyde-lyase	2-Dehydro-3-deoxy-D-xylonate <=> Pyruvate + Glycolaldehyde	Pentose and glucuronate interconversions	4.1.2.28
0.0005	0	0.001	R01678	Lactose galactohydrolase	Lactose + H2O <=> alpha-D-Glucose + D-Galactose	Galactose metabolism	3.2.1.23 3.2.1.108
0.0005	0	0.001	R01632	Protocatechuate:oxygen 4,5-oxidoreductase (decyclizing)	3,4-Dihydroxybenzoate + Oxygen <=> 4-Carboxy-2-hydroxymuconate semialdehyde	Benzoate degradation via hydroxylation,2,4-Dichlorobenzoate degradation	1.13.11.8
0.0005	0	0.001	R01574	D-Arabinose:NAD+ 1-oxidoreductase	D-Arabinose + NAD+ <=> D-Arabinono-1,4-lactone + NADH + H+		1.1.1.116 1.1.1.117
0.0005	0	0.001	R01371	Phenyllactate:NADP+ oxidoreductase	Phenyllactate + NADP+ <=> Phenylpyruvate + NADPH	Phenylalanine metabolism	1.1.1.222 1.1.1.237
0.0005	0	0.001	R01370	Phenyllactate:NAD+ oxidoreductase	Phenyllactate + NAD+ <=> Phenylpyruvate + NADH	Phenylalanine metabolism	1.1.1.222 1.1.1.237
0.0005	0	0.001	R01352	Glycerol-ester acylhydrolase	2-Acylglycerol + H2O <=> Glycerol + Fatty acid		3.1.1.23
0.0005	0	0.001	R01299	4-hydroxybenzoate,NADPH:oxygen oxidoreductase (1-hydroxylating, decarboxylating)	4-Hydroxybenzoate + Oxygen + NADPH + H+ <=> p-Benzenediol + CO2 + NADP+ + H2O		1.14.13.64
0.0005	0	0.001	R01297	4-hydroxybenzoate,NADH:oxygen oxidoreductase (1-hydroxylating, decarboxylating)	4-Hydroxybenzoate + Oxygen + NADH + H+ <=> p-Benzenediol + CO2 + NAD+ + H2O		1.14.13.64
0.0005	0	0.001	R01115	CMP-N-acetylneuraminate,ferrocytochrome-b5:oxygen oxidoreductase (N-acetyl-hydroxylating)	CMP-N-acetylneuraminate + 2 Ferrocytochrome b5 + Oxygen + 2 H+ <=> CMP-N-glycoloylneuraminate + 2 Ferricytochrome b5 + H2O	Aminosugars metabolism	1.14.18.2
0.0005	0	0.001	R01026	Acetylcholine aectylhydrolase	Acetylcholine + H2O <=> Choline + Acetate	Glycerophospholipid metabolism	3.1.1.7
0.0005	0	0.001	R01023	Acetyl-CoA:choline O-acetyltransferase	Acetyl-CoA + Choline <=> CoA + Acetylcholine	Glycerophospholipid metabolism	2.3.1.6
0.0005	0	0.001	R00983	2,3-Dihydroxyindole:oxygen 2,3-oxidoreductase (decyclizing)	2,3-Dihydroxyindole + Oxygen <=> Anthranilate + CO2	Tryptophan metabolism	1.13.11.23
0.0005	0	0.001	R00856	CTP:sn-glycerol-3-phosphate cytidylyltransferase	CTP + sn-Glycerol 3-phosphate <=> Pyrophosphate + CDP-glycerol	Glycerophospholipid metabolism	2.7.7.39
0.0005	0	0.001	R00855	CDPglycerol phosphoglycerohydrolase	CDP-glycerol + H2O <=> CMP + sn-Glycerol 3-phosphate	Glycerophospholipid metabolism	3.6.1.16
0.0005	0	0.001	R00829	Succinyl-CoA:acetyl-CoA C-acyltransferase	Succinyl-CoA + Acetyl-CoA <=> CoA + 3-Oxoadipyl-CoA	Benzoate degradation via hydroxylation	2.3.1.16 2.3.1.174
0.0005	0	0.001	R00819	Benzoate,NADH:oxygen oxidoreductase (1,2-hydroxylating, decarboxylating)	Benzoate + Oxygen + NADH <=> Catechol + CO2 + NAD+		1.14.12.10
0.0005	0	0.001	R00645		Ascorbate <=> Monodehydroascorbate + H+	Ascorbate and aldarate metabolism	1.14.-.-
0.0005	0	0.001	R00624	Secondary_alcohol:NAD+ oxidoreductase	Secondary alcohol + NAD+ <=> Ketone + NADH + H+		1.1.1.1
0.0005	0	0.001	R00621	2-Oxoglutarate:Thiamin diphosphate 2-oxidoreductase(decarboxylating and acceptor-succinylating)	2-Oxoglutarate + Thiamin diphosphate <=> 3-Carboxy-1-hydroxypropyl-ThPP + CO2	Citrate cycle (TCA cycle)	1.2.4.2
0.0005	0	0.001	R00556		L-Arginine + Oxygen + H2O <=> 2-Oxoarginine + H2O2 + NH3	Arginine and proline metabolism	1.4.3.-
0.0005	0	0.001	R00521	Formyl-CoA hydrolase	Formyl-CoA + H2O <=> CoA + Formate	Glyoxylate and dicarboxylate metabolism	3.1.2.10
0.0005	0	0.001	R00399		L-Alanine + Acetyl-CoA <=> 2-Amino-4-oxopentanoic acid + CoA	D-Arginine and D-ornithine metabolism	2.3.1.-
0.0005	0	0.001	R00393	Acyl-CoA:acetate CoA-transferase	Acyl-CoA + Acetate <=> Fatty acid anion + Acetyl-CoA		2.8.3.8
0.0005	0	0.001	R00383	Acyl-CoA hydrolase	Acyl-CoA + H2O <=> CoA + Carboxylate		3.1.2.18 3.1.2.19 3.1.2.20
0.0005	0	0.001	R00306	1,4-beta-D-Glucan glucohydrolase	Cellobiose + H2O <=> 2 D-Glucose	Starch and sucrose metabolism	3.2.1.74
0.0005	0	0.001	R00197	(R)-Lactate:ferricytochrome-c 2-oxidoreductase	(R)-Lactate + 2 Ferricytochrome c <=> Pyruvate + 2 Ferrocytochrome c	Pyruvate metabolism	1.1.2.4
0.0005	0	0.001	R00160	FAD nucleotidohydrolase	FAD + H2O <=> AMP + FMN	Riboflavin metabolism	3.6.1.9 3.6.1.18
0.0005	0	0.001	R00068	L-Ascorbate:oxygen oxidoreductase	Oxygen + 2 Ascorbate <=> 2 L-Dehydroascorbate + 2 H2O	Ascorbate and aldarate metabolism	1.10.3.3
0.0005	0	0.001	R00024	D-Ribulose 1,5-bisphosphate carboxy-lyase (dimerizing)	D-Ribulose 1,5-bisphosphate + CO2 + H2O <=> 2 3-Phospho-D-glycerate	Carbon fixation	4.1.1.39
0.0005	0	0.001	R00007	4-Hydroxy-4-methyl-2-oxoglutarate pyruvate-lyase	4-Hydroxy-4-methyl-2-oxoglutarate <=> 2 Pyruvate	Benzoate degradation via hydroxylation	4.1.3.17
0.0005	0	0.001	EC035	fatty acid oxidation (Butanoyl-CoA )	[c]btcoa + fad + h2o + nad --> aacoa + fadh2 + h + nadh	Alternate Carbon Metabolism
